# Supplementary material for: Is nucleophilic cleavage chemistry practical for 4-membered heterocycles?
Source: Royal Society of Chemistry journal article supplement (doi:10.1039/b908861j), 2009-01-01
Supplement: b908861j.pdf [file b908861j.pdf]

Supplementary Material (ESI) for Organic & Biomolecular Chemistry  
This journal is (c) The Royal Society of Chemistry 2009

Supplementary Material (ESI) for Organic & Biomolecular Chemistry

## Is Nucleophilic Cleavage Chemistry Practical for 4-Membered Heterocycles?

Harold D. Banks

U.S. Army Edgewood Chemical Biological Center, APG, Maryland 21010-5424

[harold.banks@us.army.mil](mailto:harold.banks@us.army.mil)

### Table of Contents

Energies, Thermal Corrections, Imaginary Frequencies (if any) and Cartesian Coordinates for:

|                                               |    |
|-----------------------------------------------|----|
| Cleavage Reactions of Azetidines – Gas Phase  | 2  |
| Cleavage Reactions of Oxetanes – Gas Phase    | 11 |
| Cleavage Reactions of Thietanes – Gas Phase   | 22 |
| Cleavage Reactions of Azetidines – in AN      | 28 |
| Cleavage Reactions of Oxetanes – in AN        | 35 |
| Cleavage Reactions of Thietanes – in AN       | 39 |
| Halide Displacement of Halocyclobutanes       | 42 |
| Halide Displacement of Azetidines – in AN     | 43 |
| Halide Displacement of Oxetanes – in AN       | 47 |
| Halide Displacement of Halocyclobutanes       | 49 |
| Halide Displacement of Azetidines – Gas Phase | 50 |
| Halide Displacement of Oxetanes – Gas Phase   | 52 |
| Data for Strain Energy Calculations           | 53 |

Energies (E) and thermal corrections (TC) are in hartrees, unique imaginary frequencies are in  $\text{cm}^{-1}$ .

Cleavage Reactions in GAS PHASE

**Transition State for Azetidine:** E= -229.1519685; TC=0.144781.  
Imaginary Frequency = -536.6827.

| Center<br>Number | Atomic<br>Number | Coordinates (Angstroms) |           |           |
|------------------|------------------|-------------------------|-----------|-----------|
|                  |                  | X                       | Y         | Z         |
| 1                | 1                | -0.390018               | -0.950654 | -0.946508 |
| 2                | 6                | -0.579804               | -0.503151 | 0.023810  |
| 3                | 1                | -0.623015               | -1.239633 | 0.816323  |
| 4                | 7                | -2.208717               | -0.065154 | -0.086337 |
| 5                | 6                | 0.124332                | 0.820904  | 0.292059  |
| 6                | 6                | 1.520729                | 0.531125  | -0.265090 |
| 7                | 1                | -2.803297               | -0.887620 | -0.212261 |
| 8                | 1                | -2.357113               | 0.567002  | -0.876697 |
| 9                | 1                | -2.502300               | 0.422584  | 0.764080  |
| 10               | 1                | -0.412104               | 1.680572  | -0.163904 |
| 11               | 1                | 0.173291                | 0.990201  | 1.374949  |
| 12               | 7                | 1.716704                | -0.882901 | -0.019070 |
| 13               | 1                | 1.493377                | 0.726379  | -1.353523 |
| 14               | 1                | 2.267486                | 1.230328  | 0.153892  |
| 15               | 1                | 2.206241                | -0.996036 | 0.876822  |

**Ground State for Azetidine :** E = -229.2678013; TC = 0.0.147117.

| Center<br>Number | Atomic<br>Number | Coordinates (Angstroms) |           |           |
|------------------|------------------|-------------------------|-----------|-----------|
|                  |                  | X                       | Y         | Z         |
| 1                | 1                | 1.721052                | 1.455889  | -0.873229 |
| 2                | 6                | 0.983927                | 1.046448  | -0.173730 |
| 3                | 1                | 0.417810                | 1.876589  | 0.263527  |
| 4                | 6                | 1.577654                | -0.000174 | 0.789394  |
| 5                | 7                | 0.153709                | 0.000173  | -0.843890 |
| 6                | 6                | 0.983667                | -1.046449 | -0.173947 |
| 7                | 1                | 2.660922                | -0.000324 | 0.949993  |
| 8                | 1                | 1.070356                | -0.000213 | 1.759316  |
| 9                | 1                | -0.785789               | 0.000230  | -0.436913 |
| 10               | 1                | 1.720691                | -1.455927 | -0.873531 |
| 11               | 1                | 0.417336                | -1.876538 | 0.263128  |
| 12               | 7                | -2.844376               | -0.000005 | 0.216037  |
| 13               | 1                | -3.255214               | -0.006415 | -0.715781 |
| 14               | 1                | -3.202098               | 0.822370  | 0.698469  |
| 15               | 1                | -3.201883               | -0.815789 | 0.709691  |

**Transition State for 2-Fluoroazetidine:** E = -328.2870825; TC=0.137738.  
Imaginary Frequency = -699.4644.

| Center<br>Number | Atomic<br>Number | Coordinates (Angstroms) |           |           |
|------------------|------------------|-------------------------|-----------|-----------|
|                  |                  | X                       | Y         | Z         |
| 1                | 1                | 1.096895                | -1.545346 | -0.348610 |
| 2                | 6                | 0.771315                | -0.515822 | -0.329271 |
| 3                | 1                | 0.562874                | -0.043460 | -1.278329 |
| 4                | 7                | 2.484128                | 0.207084  | -0.142409 |
| 5                | 6                | 0.115539                | 0.079524  | 0.904883  |
| 6                | 6                | -1.308559               | -0.068833 | 0.432675  |
| 7                | 1                | 3.123040                | -0.140558 | -0.859772 |

Supplementary Material (ESI) for Organic & Biomolecular Chemistry  
 This journal is (c) The Royal Society of Chemistry 2009

|    |   |           |           |           |
|----|---|-----------|-----------|-----------|
| 8  | 1 | 2.880155  | -0.008054 | 0.774345  |
| 9  | 1 | 2.420869  | 1.222794  | -0.232017 |
| 10 | 1 | 0.321505  | -0.530171 | 1.791122  |
| 11 | 1 | 0.401830  | 1.118699  | 1.089949  |
| 12 | 7 | -1.234860 | -1.213420 | -0.278456 |
| 13 | 9 | -1.420328 | 1.253692  | -0.483313 |
| 14 | 1 | -2.148441 | 0.168594  | 1.097122  |
| 15 | 1 | -2.090426 | -1.450582 | -0.787664 |

**Transition State for 2-Fluoroazetidone @ C<sub>2</sub>:** E = -328.2513786;  
 TC=0.137017. Imaginary Frequency = -482.4612.

| Center<br>Number | Atomic<br>Number | Atomic<br>Type | Coordinates (Angstroms) |           |           |
|------------------|------------------|----------------|-------------------------|-----------|-----------|
|                  |                  |                | X                       | Y         | Z         |
| 1                | 1                | 0              | 0.202709                | 0.285110  | -1.271719 |
| 2                | 6                | 0              | 0.465314                | 0.145266  | -0.228593 |
| 3                | 7                | 0              | 1.980306                | -0.582250 | -0.294737 |
| 4                | 6                | 0              | -0.376732               | -0.790897 | 0.594424  |
| 5                | 6                | 0              | -1.725071               | -0.653191 | -0.101495 |
| 6                | 1                | 0              | 2.629370                | 0.029800  | -0.797642 |
| 7                | 1                | 0              | 1.938411                | -1.493295 | -0.759223 |
| 8                | 1                | 0              | 2.332918                | -0.708397 | 0.658793  |
| 9                | 1                | 0              | 0.041847                | -1.809347 | 0.666273  |
| 10               | 1                | 0              | -0.467144               | -0.362398 | 1.598065  |
| 11               | 7                | 0              | -1.762596               | 0.779422  | -0.189476 |
| 12               | 1                | 0              | -2.442280               | 1.086912  | -0.895876 |
| 13               | 9                | 0              | 0.914340                | 1.307400  | 0.355774  |
| 14               | 1                | 0              | -2.521472               | -1.168519 | 0.472314  |
| 15               | 1                | 0              | -1.648450               | -1.213735 | -1.069481 |

**Ground State for 2-Fluoroazetidone :** E = -328.3839197; TC = 0.139848.

| Center<br>Number | Atomic<br>Number | Coordinates (Angstroms) |           |           |
|------------------|------------------|-------------------------|-----------|-----------|
|                  |                  | X                       | Y         | Z         |
| 1                | 1                | 0.726971                | 1.934680  | -0.397878 |
| 2                | 6                | -0.174585               | 1.325291  | -0.294969 |
| 3                | 1                | -1.054822               | 1.906694  | -0.589912 |
| 4                | 7                | -0.077614               | -0.003526 | -0.960476 |
| 5                | 6                | -0.369205               | 0.564458  | 1.036561  |
| 6                | 6                | -0.722070               | -0.634999 | 0.161528  |
| 7                | 1                | -0.525347               | -0.134753 | -1.868592 |
| 8                | 1                | 0.569869                | 0.421931  | 1.573999  |
| 9                | 1                | -1.163749               | 0.898328  | 1.705084  |
| 10               | 9                | -2.137945               | -0.708207 | -0.009216 |
| 11               | 1                | -0.412770               | -1.654057 | 0.403455  |
| 12               | 1                | 2.106546                | -0.399858 | -0.496312 |
| 13               | 7                | 2.891739                | -0.419770 | 0.157514  |
| 14               | 1                | 3.616354                | 0.198432  | -0.201511 |
| 15               | 1                | 3.274737                | -1.362956 | 0.156619  |

**Transition State for 3-Fluoroazetidone:** E = -328.2661547; TC=0.137655.  
 Imaginary Frequency = -503.5557.

| Center<br>Number | Atomic<br>Number | Coordinates (Angstroms) |   |   |
|------------------|------------------|-------------------------|---|---|
|                  |                  | X                       | Y | Z |

Supplementary Material (ESI) for Organic & Biomolecular Chemistry  
 This journal is (c) The Royal Society of Chemistry 2009

|    |   |           |           |           |
|----|---|-----------|-----------|-----------|
| 1  | 1 | 0.283721  | -1.718551 | 0.644625  |
| 2  | 6 | 0.363729  | -0.892433 | -0.051036 |
| 3  | 1 | 0.167776  | -1.158430 | -1.086311 |
| 4  | 7 | 2.027294  | -0.624144 | -0.065164 |
| 5  | 6 | -0.195915 | 0.453087  | 0.374987  |
| 6  | 6 | -1.558822 | 0.473819  | -0.240653 |
| 7  | 1 | 2.527434  | -1.444173 | -0.415661 |
| 8  | 1 | 2.367089  | -0.410926 | 0.876915  |
| 9  | 1 | 2.228151  | 0.190946  | -0.651973 |
| 10 | 1 | -0.236119 | 0.541062  | 1.463250  |
| 11 | 9 | 0.707119  | 1.509438  | -0.055058 |
| 12 | 7 | -1.908686 | -0.869195 | 0.184725  |
| 13 | 1 | -1.415756 | 0.628944  | -1.331716 |
| 14 | 1 | -2.182354 | 1.310471  | 0.125046  |
| 15 | 1 | -2.588216 | -1.277751 | -0.465366 |

**Ground State for 3-Fluoroazetidide:** E = -328.3693544; TC = 0.139682.

| Center<br>Number | Atomic<br>Number | Coordinates (Angstroms) |           |           |
|------------------|------------------|-------------------------|-----------|-----------|
|                  |                  | X                       | Y         | Z         |
| 1                | 1                | 0.283721                | -1.718551 | 0.644625  |
| 2                | 6                | 0.363729                | -0.892433 | -0.051036 |
| 3                | 1                | 0.167776                | -1.158430 | -1.086311 |
| 4                | 7                | 2.027294                | -0.624144 | -0.065164 |
| 5                | 6                | -0.195915               | 0.453087  | 0.374987  |
| 6                | 6                | -1.558822               | 0.473819  | -0.240653 |
| 7                | 1                | 2.527434                | -1.444173 | -0.415661 |
| 8                | 1                | 2.367089                | -0.410925 | 0.876915  |
| 9                | 1                | 2.228151                | 0.190946  | -0.651973 |
| 10               | 1                | -0.236119               | 0.541062  | 1.463250  |
| 11               | 9                | 0.707119                | 1.509438  | -0.055058 |
| 12               | 7                | -1.908686               | -0.869195 | 0.184725  |
| 13               | 1                | -1.415756               | 0.628943  | -1.331716 |
| 14               | 1                | -2.182354               | 1.310471  | 0.125046  |
| 15               | 1                | -2.588216               | -1.277752 | -0.465366 |

**Transition State for 2,2-Difluoroazetidide:** E = -427.4103785;

TC=0.129939.

Imaginary Frequency = -658.5232.

| Center<br>Number | Atomic<br>Number | Atomic<br>Type | Coordinates (Angstroms) |           |           |
|------------------|------------------|----------------|-------------------------|-----------|-----------|
|                  |                  |                | X                       | Y         | Z         |
| 1                | 1                | 0              | -1.167198               | 0.736173  | 1.100548  |
| 2                | 6                | 0              | -1.196844               | 0.565325  | 0.032630  |
| 3                | 1                | 0              | -1.484009               | 1.397671  | -0.591439 |
| 4                | 7                | 0              | -2.875829               | -0.269696 | 0.019348  |
| 5                | 6                | 0              | -0.333032               | -0.539611 | -0.525982 |
| 6                | 6                | 0              | 0.980299                | 0.051209  | -0.074391 |
| 7                | 1                | 0              | -3.616101               | 0.369079  | 0.316108  |
| 8                | 1                | 0              | -2.871690               | -1.072678 | 0.651037  |
| 9                | 1                | 0              | -3.098831               | -0.605697 | -0.919459 |
| 10               | 1                | 0              | -0.524341               | -1.523733 | -0.090260 |
| 11               | 1                | 0              | -0.385834               | -0.588289 | -1.616159 |
| 12               | 7                | 0              | 0.797042                | 1.378436  | -0.191729 |
| 13               | 1                | 0              | 1.487736                | 1.912652  | 0.343456  |
| 14               | 9                | 0              | 2.107736                | -0.550293 | -0.697258 |
| 15               | 9                | 0              | 1.171067                | -0.432807 | 1.299402  |

**Transition State for 2,2-Difluoroazetidone @ C<sub>2</sub>:** E = -427.3449513; TC = 0.129503. Imaginary Frequency = -236.2005.

| Center Number | Atomic Number | Atomic Type | Coordinates (Angstroms) |           |           |
|---------------|---------------|-------------|-------------------------|-----------|-----------|
|               |               |             | X                       | Y         | Z         |
| 1             | 6             | 0           | 0.544211                | -0.070278 | 0.013177  |
| 2             | 7             | 0           | 2.027562                | 0.500714  | -0.219062 |
| 3             | 6             | 0           | -0.436560               | 0.962866  | -0.458214 |
| 4             | 6             | 0           | -1.820098               | 0.650043  | 0.118236  |
| 5             | 1             | 0           | 2.523643                | -0.118694 | -0.870896 |
| 6             | 1             | 0           | 2.529218                | 0.513823  | 0.677291  |
| 7             | 1             | 0           | 2.002994                | 1.449698  | -0.606523 |
| 8             | 1             | 0           | -0.067442               | 1.955728  | -0.156778 |
| 9             | 1             | 0           | -0.475711               | 0.886993  | -1.550590 |
| 10            | 7             | 0           | -2.012933               | -0.720467 | -0.198410 |
| 11            | 1             | 0           | -2.910078               | -1.039293 | 0.183645  |
| 12            | 9             | 0           | 0.640465                | -1.234309 | -0.641079 |
| 13            | 1             | 0           | -2.501188               | 1.417021  | -0.335301 |
| 14            | 1             | 0           | -1.768658               | 0.934260  | 1.201683  |
| 15            | 9             | 0           | 0.563924                | -0.289808 | 1.345589  |

**Ground State for 2,2-Difluoroazetidone :** E = -427.4955905; TC = 0.131611.

| Center Number | Atomic Number | Atomic Type | Coordinates (Angstroms) |           |           |
|---------------|---------------|-------------|-------------------------|-----------|-----------|
|               |               |             | X                       | Y         | Z         |
| 1             | 1             | 0           | -1.011699               | 1.038427  | 1.022553  |
| 2             | 6             | 0           | -0.609208               | 0.968207  | 0.008424  |
| 3             | 1             | 0           | -1.220560               | 1.552190  | -0.679829 |
| 4             | 7             | 0           | -3.731914               | -0.326491 | 0.028892  |
| 5             | 6             | 0           | -0.289544               | -0.486867 | -0.394932 |
| 6             | 6             | 0           | 1.141748                | -0.119678 | -0.043777 |
| 7             | 1             | 0           | -4.358139               | 0.475988  | 0.023656  |
| 8             | 1             | 0           | -4.014887               | -0.924988 | 0.802154  |
| 9             | 1             | 0           | -3.899018               | -0.844955 | -0.831036 |
| 10            | 1             | 0           | -0.733171               | -1.281793 | 0.201718  |
| 11            | 1             | 0           | -0.411165               | -0.678736 | -1.461788 |
| 12            | 7             | 0           | 0.849720                | 1.265116  | -0.096681 |
| 13            | 1             | 0           | 1.301703                | 1.861249  | 0.595472  |
| 14            | 9             | 0           | 2.166351                | -0.538028 | -0.854288 |
| 15            | 9             | 0           | 1.507462                | -0.566164 | 1.230214  |

**Transition State for 3,3-Difluoroazetidone:** E = -427.3783463; TC = 0.129904.

Imaginary Frequency = -466.8560.

| Center Number | Atomic Number | Atomic Type | Coordinates (Angstroms) |           |           |
|---------------|---------------|-------------|-------------------------|-----------|-----------|
|               |               |             | X                       | Y         | Z         |
| 1             | 1             | 0           | 0.223079                | 1.600178  | -0.883993 |
| 2             | 6             | 0           | 0.414784                | 1.010051  | 0.005000  |
| 3             | 1             | 0           | 0.329467                | 1.564359  | 0.931711  |
| 4             | 7             | 0           | 2.053820                | 0.695466  | -0.039334 |
| 5             | 6             | 0           | -0.186440               | -0.383806 | -0.011677 |
| 6             | 6             | 0           | -1.576377               | -0.248256 | -0.531757 |

Supplementary Material (ESI) for Organic & Biomolecular Chemistry  
 This journal is (c) The Royal Society of Chemistry 2009

|    |   |   |           |           |           |
|----|---|---|-----------|-----------|-----------|
| 7  | 1 | 0 | 2.589004  | 1.566771  | -0.008456 |
| 8  | 1 | 0 | 2.294261  | 0.167092  | -0.883434 |
| 9  | 1 | 0 | 2.314973  | 0.116844  | 0.765528  |
| 10 | 7 | 0 | -1.882782 | 1.090240  | -0.056124 |
| 11 | 1 | 0 | -2.310803 | 1.001418  | 0.872425  |
| 12 | 1 | 0 | -1.542059 | -0.290970 | -1.631500 |
| 13 | 1 | 0 | -2.198457 | -1.088351 | -0.185983 |
| 14 | 9 | 0 | -0.118563 | -0.882313 | 1.282385  |
| 15 | 9 | 0 | 0.695392  | -1.273822 | -0.735439 |

**Ground State for 3,3-Difluoroazetidione:** E = -427.4795382; TC = 0.131789.

| Center Number | Atomic Number | Atomic Type | Coordinates (Angstroms) |           |           |
|---------------|---------------|-------------|-------------------------|-----------|-----------|
|               |               |             | X                       | Y         | Z         |
| 1             | 1             | 0           | -0.224551               | 1.735745  | 0.480372  |
| 2             | 6             | 0           | 0.377844                | 1.126615  | -0.192190 |
| 3             | 1             | 0           | 0.176125                | 1.399427  | -1.234626 |
| 4             | 7             | 0           | -2.785180               | 0.586305  | -0.020683 |
| 5             | 6             | 0           | 0.284206                | -0.381159 | -0.010899 |
| 6             | 6             | 0           | 1.804343                | -0.456021 | -0.069722 |
| 7             | 1             | 0           | -3.723576               | 0.981083  | -0.035345 |
| 8             | 1             | 0           | -2.660640               | 0.125851  | 0.878874  |
| 9             | 1             | 0           | -2.747833               | -0.140303 | -0.732648 |
| 10            | 7             | 0           | 1.821664                | 1.013556  | 0.172167  |
| 11            | 1             | 0           | 2.454453                | 1.533550  | -0.434382 |
| 12            | 1             | 0           | 2.295671                | -1.051228 | 0.703389  |
| 13            | 1             | 0           | 2.133094                | -0.770520 | -1.068056 |
| 14            | 9             | 0           | -0.396729               | -1.090189 | -0.974523 |
| 15            | 9             | 0           | -0.242881               | -0.770838 | 1.198846  |

**Transition State for cis-2,3-Difluoroazetidione:** E = -427.3898067;  
 TC=0.130531.  
 Imaginary Frequency = -705.5336.

| Center Number | Atomic Number | Coordinates (Angstroms) |           |           |
|---------------|---------------|-------------------------|-----------|-----------|
|               |               | X                       | Y         | Z         |
| 1             | 1             | 0.850461                | 1.899505  | -0.276309 |
| 2             | 6             | 0.596547                | 0.941032  | 0.152006  |
| 3             | 1             | 0.351978                | 0.907797  | 1.204044  |
| 4             | 7             | 2.330456                | 0.349954  | 0.347345  |
| 5             | 6             | 0.055199                | -0.194040 | -0.716384 |
| 6             | 1             | 0.219248                | -0.010292 | -1.780720 |
| 7             | 1             | 2.861001                | 0.985508  | 0.945355  |
| 8             | 1             | 2.817894                | 0.256549  | -0.545782 |
| 9             | 1             | 2.292771                | -0.576322 | 0.776881  |
| 10            | 6             | -1.395098               | -0.082690 | -0.329097 |
| 11            | 9             | 0.689709                | -1.427717 | -0.427232 |
| 12            | 7             | -1.420703               | 1.276833  | -0.279977 |
| 13            | 1             | -2.147746               | -0.666527 | -0.873068 |
| 14            | 9             | -1.450859               | -0.779919 | 1.029999  |
| 15            | 1             | -2.303415               | 1.699178  | 0.013972  |

**Ground State for cis-2,3-Difluoroazetidione :** E = -427.4770485; TC = 0.132643.

| Center | Atomic | Coordinates (Angstroms) |  |  |
|--------|--------|-------------------------|--|--|
|--------|--------|-------------------------|--|--|

Supplementary Material (ESI) for Organic & Biomolecular Chemistry  
 This journal is (c) The Royal Society of Chemistry 2009

| Number | Number | X         | Y         | Z         |
|--------|--------|-----------|-----------|-----------|
| 1      | 9      | -0.349787 | 1.545837  | -0.646767 |
| 2      | 6      | 0.763779  | 0.966077  | -0.052532 |
| 3      | 6      | 1.165035  | -0.417120 | -0.585754 |
| 4      | 6      | 0.549423  | 0.269307  | 1.298644  |
| 5      | 1      | 1.579058  | 1.692211  | -0.066362 |
| 6      | 7      | 1.452599  | -0.786977 | 0.761719  |
| 7      | 9      | 0.011185  | -1.061424 | -1.119549 |
| 8      | 1      | 0.928315  | 0.768747  | 2.193640  |
| 9      | 1      | -0.494440 | -0.037029 | 1.418241  |
| 10     | 1      | 1.946249  | -0.563247 | -1.333707 |
| 11     | 7      | -2.672337 | -0.397704 | 0.433267  |
| 12     | 1      | 1.315154  | -1.759781 | 1.032359  |
| 13     | 1      | -2.114065 | -0.735117 | -0.349098 |
| 14     | 1      | -3.547517 | -0.917935 | 0.438702  |
| 15     | 1      | -2.896598 | 0.575623  | 0.236016  |

**Transition State for *trans*-2,3-Difluoroazetidine:** E = -427.388335; TC = 0.130457. Imaginary Frequency = -643.6997 cm<sup>-1</sup>.

| Center Number | Atomic Number | Coordinates (Angstroms) |           |           |
|---------------|---------------|-------------------------|-----------|-----------|
|               |               | X                       | Y         | Z         |
| 1             | 1             | 1.035442                | 1.674534  | -0.662801 |
| 2             | 6             | 0.912895                | 0.874932  | 0.051754  |
| 3             | 1             | 0.967065                | 1.146302  | 1.099989  |
| 4             | 7             | 2.574275                | 0.146798  | -0.096757 |
| 5             | 6             | 0.055207                | -0.318403 | -0.296077 |
| 6             | 1             | -0.038312               | -0.482841 | -1.371420 |
| 7             | 1             | 3.299046                | 0.800356  | 0.205748  |
| 8             | 1             | 2.765099                | -0.125235 | -1.063740 |
| 9             | 1             | 2.606062                | -0.698192 | 0.477922  |
| 10            | 6             | -1.242094               | 0.131765  | 0.307017  |
| 11            | 9             | 0.604940                | -1.507584 | 0.263094  |
| 12            | 7             | -1.196093               | 1.464706  | -0.066217 |
| 13            | 9             | -2.337504               | -0.675507 | -0.248093 |
| 14            | 1             | -1.293321               | -0.126891 | 1.379255  |
| 15            | 1             | -1.751333               | 2.049486  | 0.564691  |

**Ground State for *trans*-2,3-Difluoroazetidine:** E = -427.4786664; TC = 0.132593.

| Center Number | Atomic Number | Coordinates (Angstroms) |           |           |
|---------------|---------------|-------------------------|-----------|-----------|
|               |               | X                       | Y         | Z         |
| 1             | 1             | 1.722366                | 0.725488  | 1.247017  |
| 2             | 6             | 1.452445                | 0.125644  | 0.376777  |
| 3             | 6             | 0.259016                | 0.616445  | -0.445484 |
| 4             | 6             | 0.647801                | -1.169572 | 0.571917  |
| 5             | 9             | 2.600318                | -0.064246 | -0.399272 |
| 6             | 7             | -0.234580               | -0.713377 | -0.525642 |
| 7             | 9             | -0.534252               | 1.467342  | 0.410361  |
| 8             | 1             | 1.193442                | -2.092223 | 0.358588  |
| 9             | 1             | 0.171774                | -1.229204 | 1.559324  |
| 10            | 1             | 0.388490                | 1.183279  | -1.369509 |
| 11            | 1             | -1.250824               | -0.848312 | -0.479989 |

Supplementary Material (ESI) for Organic & Biomolecular Chemistry  
 This journal is (c) The Royal Society of Chemistry 2009

|    |   |           |           |           |
|----|---|-----------|-----------|-----------|
| 12 | 7 | -3.242119 | -0.340214 | -0.103055 |
| 13 | 1 | -2.989896 | 0.573167  | 0.273642  |
| 14 | 1 | -3.845734 | -0.183157 | -0.908302 |
| 15 | 1 | -3.802887 | -0.816863 | 0.601041  |

**Transition State for *trans*-2,4-Difluoroazetidione:** E = -427.3795835.  
 TC = 0.130033. Imaginary frequency = -670.678.

| Center<br>Number | Atomic<br>Number | Atomic<br>Type | Coordinates (Angstroms) |           |           |
|------------------|------------------|----------------|-------------------------|-----------|-----------|
|                  |                  |                | X                       | Y         | Z         |
| 1                | 1                | 0              | 0.964786                | 0.601766  | -1.284422 |
| 2                | 6                | 0              | 0.871886                | 0.242618  | -0.273815 |
| 3                | 7                | 0              | 2.430929                | -0.763539 | -0.253091 |
| 4                | 6                | 0              | -0.133160               | -0.770069 | 0.166695  |
| 5                | 6                | 0              | -1.354501               | 0.130150  | 0.253302  |
| 6                | 1                | 0              | 3.220693                | -0.169399 | -0.514534 |
| 7                | 1                | 0              | 2.384429                | -1.557650 | -0.895169 |
| 8                | 1                | 0              | 2.593880                | -1.113754 | 0.693035  |
| 9                | 1                | 0              | -0.283291               | -1.526430 | -0.609038 |
| 10               | 1                | 0              | 0.153648                | -1.251168 | 1.107751  |
| 11               | 7                | 0              | -1.131255               | 1.036330  | -0.756885 |
| 12               | 1                | 0              | -1.669567               | 1.895749  | -0.610083 |
| 13               | 9                | 0              | 1.304929                | 1.109561  | 0.682951  |
| 14               | 9                | 0              | -2.553318               | -0.766284 | 0.098396  |
| 15               | 1                | 0              | -1.532143               | 0.505652  | 1.273078  |

**Ground State for *trans*-2,4-Difluoroazetidione:** E = -427.4798924. TC = 0.132670.

| Center<br>Number | Atomic<br>Number | Coordinates (Angstroms) |           |           |
|------------------|------------------|-------------------------|-----------|-----------|
|                  |                  | X                       | Y         | Z         |
| 1                | 1                | -1.681254               | 1.547350  | -0.967954 |
| 2                | 6                | -1.491786               | 0.898977  | -0.111731 |
| 3                | 6                | -0.119784               | 1.049059  | 0.546351  |
| 4                | 6                | -1.040423               | -0.543218 | -0.379126 |
| 5                | 1                | -2.322679               | 0.924873  | 0.595847  |
| 6                | 7                | 0.008514                | -0.370703 | 0.592164  |
| 7                | 9                | 0.790279                | 1.649316  | -0.395892 |
| 8                | 9                | -1.970204               | -1.530821 | -0.022164 |
| 9                | 1                | -0.730033               | -0.787319 | -1.400390 |
| 10               | 1                | 0.043248                | 1.607464  | 1.469632  |
| 11               | 7                | 2.918568                | -0.960856 | -0.051997 |
| 12               | 1                | 0.936040                | -0.796660 | 0.472024  |
| 13               | 1                | 2.988928                | -0.023200 | -0.446367 |
| 14               | 1                | 3.601605                | -1.028607 | 0.700535  |
| 15               | 1                | 3.205857                | -1.618350 | -0.774946 |

**Transition State for *cis*-2,4-Difluoroazetidione:** E = -427.3787283.  
 TC = 0.130146. Imaginary frequency = -698.946.

| Center<br>Number | Atomic<br>Number | Atomic<br>Type | Coordinates (Angstroms) |           |          |
|------------------|------------------|----------------|-------------------------|-----------|----------|
|                  |                  |                | X                       | Y         | Z        |
| 1                | 1                | 0              | 1.013513                | -0.495729 | 1.408199 |



Supplementary Material (ESI) for Organic & Biomolecular Chemistry  
 This journal is (c) The Royal Society of Chemistry 2009

|    |   |   |           |           |           |
|----|---|---|-----------|-----------|-----------|
| 2  | 6 | 0 | 0.762083  | -0.216716 | 0.397553  |
| 3  | 7 | 0 | 2.430333  | 0.393854  | -0.064832 |
| 4  | 6 | 0 | -0.048377 | 1.008902  | 0.048351  |
| 5  | 6 | 0 | -1.447917 | 0.479848  | 0.281364  |
| 6  | 1 | 0 | 3.112822  | -0.348096 | 0.105568  |
| 7  | 1 | 0 | 2.716882  | 1.234211  | 0.441793  |
| 8  | 1 | 0 | 2.425474  | 0.595981  | -1.066905 |
| 9  | 1 | 0 | 0.215315  | 1.823163  | 0.734575  |
| 10 | 1 | 0 | 0.125704  | 1.320405  | -0.985549 |
| 11 | 7 | 0 | -1.212961 | -0.506601 | 1.185771  |
| 12 | 1 | 0 | -2.041036 | -1.054964 | 1.432340  |
| 13 | 9 | 0 | -1.846155 | -0.006338 | -1.135690 |
| 14 | 1 | 0 | -2.255903 | 1.213157  | 0.424495  |
| 15 | 9 | 0 | 0.798476  | -1.230451 | -0.498165 |

**Ground State for *cis*-2,4-Difluoroazetidine:** E = -427.4951370. TC = 0.132722.

| Center Number | Atomic Number | Atomic Type | Coordinates (Angstroms) |           |           |
|---------------|---------------|-------------|-------------------------|-----------|-----------|
|               |               |             | X                       | Y         | Z         |
| 1             | 6             | 0           | -0.615537               | -1.027663 | 0.350421  |
| 2             | 1             | 0           | -0.292796               | -1.605807 | 1.222441  |
| 3             | 6             | 0           | -1.682672               | 0.045937  | 0.583051  |
| 4             | 6             | 0           | -0.543035               | 1.041793  | 0.349091  |
| 5             | 7             | 0           | 0.286543                | -0.023476 | -0.122288 |
| 6             | 1             | 0           | 1.297889                | -0.056011 | 0.044372  |
| 7             | 1             | 0           | -2.177304               | 0.063904  | 1.555826  |
| 8             | 1             | 0           | -2.415113               | 0.071081  | -0.225417 |
| 9             | 9             | 0           | -0.943733               | -1.995552 | -0.621579 |
| 10            | 9             | 0           | -0.802495               | 2.029461  | -0.624259 |
| 11            | 1             | 0           | -0.180501               | 1.597077  | 1.220317  |
| 12            | 7             | 0           | 3.341696                | -0.057905 | 0.080516  |
| 13            | 1             | 0           | 3.596956                | 0.746816  | -0.489996 |
| 14            | 1             | 0           | 3.620045                | -0.889185 | -0.438671 |
| 15            | 1             | 0           | 3.916668                | -0.023779 | 0.920692  |

**Transition State for 2-Chloroazetidine:** E = -688.2956329; TC = 0.136938.

Imaginary Frequency = -672.6771 cm<sup>-1</sup>.

| Center Number | Atomic Number | Atomic Type | Coordinates (Angstroms) |           |           |
|---------------|---------------|-------------|-------------------------|-----------|-----------|
|               |               |             | X                       | Y         | Z         |
| 1             | 6             | 0           | -1.547097               | 0.516377  | -0.013915 |
| 2             | 7             | 0           | -3.092032               | -0.585705 | -0.043486 |
| 3             | 6             | 0           | -0.464554               | -0.532265 | 0.028029  |
| 4             | 6             | 0           | 0.656810                | 0.403457  | 0.404891  |
| 5             | 1             | 0           | -3.949984               | -0.041471 | -0.151250 |
| 6             | 1             | 0           | -3.168690               | -1.141144 | 0.810322  |
| 7             | 1             | 0           | -3.021376               | -1.230875 | -0.832699 |
| 8             | 1             | 0           | -0.641442               | -1.333362 | 0.753768  |
| 9             | 1             | 0           | -0.292381               | -0.964776 | -0.960229 |
| 10            | 7             | 0           | 0.344854                | 1.547612  | -0.267579 |
| 11            | 1             | 0           | 0.789796                | 2.368989  | 0.156620  |
| 12            | 1             | 0           | 0.854919                | 0.439933  | 1.483935  |

Supplementary Material (ESI) for Organic & Biomolecular Chemistry  
 This journal is (c) The Royal Society of Chemistry 2009

|    |    |   |           |           |           |
|----|----|---|-----------|-----------|-----------|
| 13 | 1  | 0 | -1.804252 | 1.034021  | 0.902760  |
| 14 | 1  | 0 | -1.779323 | 1.025680  | -0.935980 |
| 15 | 17 | 0 | 2.374825  | -0.542103 | -0.091990 |

**Ground State for 2-Chloroazetidione:** E = -688.3929838; TC = 0.138961.

| Center<br>Number | Atomic<br>Number | Atomic<br>Type | Coordinates (Angstroms) |           |           |
|------------------|------------------|----------------|-------------------------|-----------|-----------|
|                  |                  |                | X                       | Y         | Z         |
| 1                | 6                | 0              | 0.369074                | 1.439029  | -0.286392 |
| 2                | 6                | 0              | -0.360415               | -0.466668 | 0.166011  |
| 3                | 6                | 0              | 0.133330                | 0.691303  | 1.042408  |
| 4                | 1                | 0              | 1.313313                | 1.976992  | -0.404552 |
| 5                | 1                | 0              | -0.469106               | 2.089043  | -0.563664 |
| 6                | 7                | 0              | 0.344632                | 0.113236  | -0.959329 |
| 7                | 1                | 0              | -0.102240               | 0.043697  | -1.874799 |
| 8                | 1                | 0              | -0.580935               | 1.112100  | 1.750417  |
| 9                | 1                | 0              | 1.072954                | 0.433017  | 1.535317  |
| 10               | 17               | 0              | -2.171059               | -0.454130 | -0.007020 |
| 11               | 1                | 0              | -0.107618               | -1.498966 | 0.411117  |
| 12               | 1                | 0              | 2.448886                | -0.547433 | -0.504348 |
| 13               | 7                | 0              | 3.224237                | -0.687618 | 0.146838  |
| 14               | 1                | 0              | 4.028900                | -0.174078 | -0.206904 |
| 15               | 1                | 0              | 3.469833                | -1.675473 | 0.132028  |

**Transition State for 3-Chloroazetidione:** E = -688.2831065; TC = 0.136491.

| Center<br>Number | Atomic<br>Number | Atomic<br>Type | Coordinates (Angstroms) |           |           |
|------------------|------------------|----------------|-------------------------|-----------|-----------|
|                  |                  |                | X                       | Y         | Z         |
| 1                | 1                | 0              | -0.675334               | 1.913244  | -0.883980 |
| 2                | 6                | 0              | -0.510708               | 1.194171  | -0.090012 |
| 3                | 1                | 0              | -0.797497               | 1.506436  | 0.908393  |
| 4                | 7                | 0              | 1.326633                | 1.748282  | 0.149883  |
| 5                | 6                | 0              | -0.477278               | -0.233209 | -0.381524 |
| 6                | 6                | 0              | -1.510936               | -0.917103 | 0.408508  |
| 7                | 1                | 0              | 1.404433                | 2.699347  | 0.515046  |
| 8                | 1                | 0              | 1.838355                | 1.679038  | -0.731006 |
| 9                | 1                | 0              | 1.756096                | 1.067298  | 0.781573  |
| 10               | 1                | 0              | -0.493007               | -0.478723 | -1.437531 |
| 11               | 7                | 0              | -2.379531               | 0.098852  | -0.224444 |
| 12               | 1                | 0              | -1.376281               | -0.846675 | 1.492893  |
| 13               | 1                | 0              | -1.727844               | -1.941702 | 0.106401  |
| 14               | 1                | 0              | -2.702888               | 0.750811  | 0.504466  |
| 15               | 17               | 0              | 1.478693                | -1.149539 | -0.020950 |

**Ground State for 3-Chloroazetidione:** E = -688.3820778; TC = 0.138873.

| Center<br>Number | Atomic<br>Number | Atomic<br>Type | Coordinates (Angstroms) |           |           |
|------------------|------------------|----------------|-------------------------|-----------|-----------|
|                  |                  |                | X                       | Y         | Z         |
| 1                | 1                | 0              | 1.154039                | -1.806558 | -1.499678 |
| 2                | 6                | 0              | 0.512908                | -1.040721 | -1.047881 |
| 3                | 1                | 0              | 0.002672                | -0.486849 | -1.842162 |
| 4                | 6                | 0              | 1.265025                | -0.203694 | 0.000478  |
| 5                | 7                | 0              | -0.370384               | -1.622156 | -0.000225 |
| 6                | 6                | 0              | 0.511573                | -1.040182 | 1.048230  |
| 7                | 1                | 0              | 2.356676                | -0.230072 | 0.001119  |

Supplementary Material (ESI) for Organic & Biomolecular Chemistry  
 This journal is (c) The Royal Society of Chemistry 2009

|    |    |   |           |           |           |
|----|----|---|-----------|-----------|-----------|
| 8  | 1  | 0 | -1.273539 | -1.137691 | -0.000885 |
| 9  | 1  | 0 | 1.152081  | -1.805814 | 1.501257  |
| 10 | 1  | 0 | 0.000351  | -0.485861 | 1.841556  |
| 11 | 7  | 0 | -2.755521 | 0.410713  | -0.000188 |
| 12 | 1  | 0 | -3.357001 | 0.481861  | -0.818920 |
| 13 | 1  | 0 | -2.140163 | 1.222914  | -0.000468 |
| 14 | 1  | 0 | -3.357260 | 0.482421  | 0.818303  |
| 15 | 17 | 0 | 0.800379  | 1.526667  | -0.000129 |

**Transition State for 2,2-Dichloroazetidide:** E = -1147.4322893; TC = 0.128052.

Imaginary Frequency = -620.6866 cm<sup>-1</sup>.

| Center Number | Atomic Number | Atomic Type | Coordinates (Angstroms) |           |           |
|---------------|---------------|-------------|-------------------------|-----------|-----------|
|               |               |             | X                       | Y         | Z         |
| 1             | 1             | 0           | 1.163864                | -0.567608 | 1.107418  |
| 2             | 6             | 0           | 0.564737                | -1.251804 | 0.521418  |
| 3             | 1             | 0           | 0.589811                | -2.315275 | 0.712729  |
| 4             | 7             | 0           | 2.462291                | -1.381984 | -0.570188 |
| 5             | 6             | 0           | -0.131725               | -0.671888 | -0.703120 |
| 6             | 6             | 0           | -1.336086               | -0.332402 | 0.091697  |
| 7             | 1             | 0           | 3.215342                | -1.841492 | -0.057234 |
| 8             | 1             | 0           | 2.610765                | -0.359102 | -0.499192 |
| 9             | 1             | 0           | 2.547978                | -1.658976 | -1.548494 |
| 10            | 1             | 0           | 0.398666                | 0.228462  | -1.039474 |
| 11            | 1             | 0           | -0.309943               | -1.379066 | -1.517224 |
| 12            | 7             | 0           | -1.068052               | -0.808023 | 1.255528  |
| 13            | 1             | 0           | -1.646823               | -0.662695 | 2.088363  |
| 14            | 17            | 0           | -2.706745               | 0.537740  | -0.398868 |
| 15            | 17            | 0           | 1.947281                | 1.663575  | 0.192736  |

**Ground State for 2,2-Dichloroazetidide:** E = -1147.5084421; TC = 0.130068.

| Center Number | Atomic Number | Atomic Type | Coordinates (Angstroms) |           |           |
|---------------|---------------|-------------|-------------------------|-----------|-----------|
|               |               |             | X                       | Y         | Z         |
| 1             | 6             | 0           | -0.549177               | -0.006670 | -0.052254 |
| 2             | 6             | 0           | -0.593352               | 2.013970  | -0.450614 |
| 3             | 6             | 0           | -1.682259               | 1.020324  | 0.014765  |
| 4             | 1             | 0           | -0.856998               | 2.711742  | -1.249267 |
| 5             | 7             | 0           | 0.183807                | 0.842755  | -0.911913 |
| 6             | 1             | 0           | 1.211562                | 0.802780  | -0.872353 |
| 7             | 1             | 0           | -2.426778               | 0.831906  | -0.761106 |
| 8             | 17            | 0           | 0.197858                | -0.225912 | 1.613981  |
| 9             | 17            | 0           | -0.873520               | -1.637733 | -0.687136 |
| 10            | 1             | 0           | -2.155501               | 1.170294  | 0.985009  |
| 11            | 1             | 0           | -0.132238               | 2.552168  | 0.386993  |
| 12            | 1             | 0           | 3.434431                | 0.306807  | 0.378772  |
| 13            | 7             | 0           | 3.063011                | 0.018803  | -0.525095 |
| 14            | 1             | 0           | 3.825295                | 0.073985  | -1.198872 |
| 15            | 1             | 0           | 2.807487                | -0.964379 | -0.437864 |

**Transition State for 2-Bromoazetidide:** E = -2801.4939786; TC = 0.136626. Imaginary frequency = -672.4135.

Center Atomic Atomic Coordinates (Angstroms)

Supplementary Material (ESI) for Organic & Biomolecular Chemistry  
 This journal is (c) The Royal Society of Chemistry 2009

| Number | Number | Type | X         | Y         | Z         |
|--------|--------|------|-----------|-----------|-----------|
| 1      | 6      | 0    | -2.224279 | 0.495920  | -0.045243 |
| 2      | 7      | 0    | -3.688546 | -0.783792 | -0.055255 |
| 3      | 6      | 0    | -1.059519 | -0.453407 | 0.077592  |
| 4      | 6      | 0    | -0.054624 | 0.606222  | 0.441014  |
| 5      | 1      | 0    | -4.595532 | -0.340710 | -0.212054 |
| 6      | 1      | 0    | -3.734375 | -1.301785 | 0.823643  |
| 7      | 1      | 0    | -3.530324 | -1.457688 | -0.806574 |
| 8      | 1      | 0    | -1.182781 | -1.227160 | 0.842357  |
| 9      | 1      | 0    | -0.817255 | -0.918018 | -0.880130 |
| 10     | 7      | 0    | -0.456246 | 1.681571  | -0.279886 |
| 11     | 1      | 0    | -0.110094 | 2.562274  | 0.117268  |
| 12     | 1      | 0    | 0.176713  | 0.695807  | 1.507182  |
| 13     | 1      | 0    | -2.574592 | 1.015369  | 0.838538  |
| 14     | 1      | 0    | -2.499473 | 0.917414  | -0.999162 |
| 15     | 35     | 0    | 1.940337  | -0.289210 | -0.049293 |

**Ground State for 2-Bromoazetidene:** E = -2801.5847999 ; TC = 0.138530.

| Center Number | Atomic Number | Atomic Type | Coordinates (Angstroms) |           |           |
|---------------|---------------|-------------|-------------------------|-----------|-----------|
|               |               |             | X                       | Y         | Z         |
| 1             | 6             | 0           | 0.830700                | 1.830827  | -0.195717 |
| 2             | 6             | 0           | 0.357019                | -0.179825 | 0.096073  |
| 3             | 6             | 0           | 0.746243                | 0.940120  | 1.063770  |
| 4             | 1             | 0           | 1.694723                | 2.492116  | -0.301042 |
| 5             | 1             | 0           | -0.094934               | 2.391501  | -0.373556 |
| 6             | 7             | 0           | 0.927142                | 0.578695  | -0.989934 |
| 7             | 1             | 0           | 0.465015                | 0.536538  | -1.898728 |
| 8             | 1             | 0           | 0.026189                | 1.209130  | 1.836119  |
| 9             | 1             | 0           | 1.726529                | 0.737897  | 1.502324  |
| 10            | 1             | 0           | 0.722397                | -1.195262 | 0.237297  |
| 11            | 1             | 0           | 2.955603                | -0.615339 | -0.569503 |
| 12            | 7             | 0           | 3.373757                | -1.257422 | 0.105491  |
| 13            | 1             | 0           | 4.309773                | -0.919932 | 0.320969  |
| 14            | 1             | 0           | 3.478577                | -2.162541 | -0.348853 |
| 15            | 35            | 0           | -1.628398               | -0.379136 | 0.000038  |

**Transition State for 2,2-Dibromoazetidene:** E= -5373.8253295;  
 TC=0.127778. Imaginary Frequency = -633.208.

| Center Number | Atomic Number | Atomic Type | Coordinates (Angstroms) |           |           |
|---------------|---------------|-------------|-------------------------|-----------|-----------|
|               |               |             | X                       | Y         | Z         |
| 1             | 1             | 0           | -1.448046               | 1.022555  | 1.009641  |
| 2             | 6             | 0           | -0.843733               | 1.782890  | 0.534214  |
| 3             | 1             | 0           | -0.905782               | 2.819158  | 0.838553  |
| 4             | 7             | 0           | -2.643476               | 1.931880  | -0.667530 |
| 5             | 6             | 0           | -0.011139               | 1.338412  | -0.661638 |
| 6             | 6             | 0           | 1.034025                | 0.773247  | 0.228929  |
| 7             | 1             | 0           | -3.450066               | 2.336202  | -0.190648 |
| 8             | 1             | 0           | -2.766282               | 0.906856  | -0.681364 |
| 9             | 1             | 0           | -2.653372               | 2.274126  | -1.628774 |
| 10            | 1             | 0           | -0.506698               | 0.563564  | -1.248990 |
| 11            | 1             | 0           | 0.351986                | 2.160674  | -1.286285 |
| 12            | 7             | 0           | 0.723490                | 1.224232  | 1.391499  |
| 13            | 1             | 0           | 1.182243                | 0.923270  | 2.256808  |
| 14            | 35            | 0           | -1.787928               | -1.321169 | 0.095496  |

Supplementary Material (ESI) for Organic & Biomolecular Chemistry  
 This journal is (c) The Royal Society of Chemistry 2009

15            35            0            2.432528    -0.349301    -0.231089

**Ground State for 2,2-Dibromoazetidene:** E= -5373.8253295. TC = 0.129265.

| Center<br>Number | Atomic<br>Number | Atomic<br>Type | Coordinates (Angstroms) |           |           |
|------------------|------------------|----------------|-------------------------|-----------|-----------|
|                  |                  |                | X                       | Y         | Z         |
| 1                | 6                | 0              | 0.113822                | 0.601791  | 0.215740  |
| 2                | 6                | 0              | -0.949348               | 1.865754  | 1.422955  |
| 3                | 6                | 0              | -0.070558               | 2.116749  | 0.171755  |
| 4                | 1                | 0              | -0.820963               | 2.539402  | 2.273858  |
| 5                | 7                | 0              | -0.240612               | 0.574917  | 1.569889  |
| 6                | 1                | 0              | -0.655618               | -0.288587 | 1.947403  |
| 7                | 1                | 0              | 0.859065                | 2.631685  | 0.425221  |
| 8                | 1                | 0              | -0.527013               | 2.537375  | -0.723422 |
| 9                | 1                | 0              | -2.011427               | 1.757612  | 1.170805  |
| 10               | 1                | 0              | -1.716782               | -2.567688 | 1.267671  |
| 11               | 7                | 0              | -0.858143               | -2.323410 | 1.758646  |
| 12               | 1                | 0              | -0.748400               | -2.981925 | 2.528925  |
| 13               | 1                | 0              | -0.091504               | -2.490568 | 1.106710  |
| 14               | 35               | 0              | 1.806509                | -0.232676 | -0.240138 |
| 15               | 35               | 0              | -1.268211               | -0.235999 | -1.021565 |

**Transition State for Oxetane:** E = -249.0338309; TC = 0.132922.

Imaginary frequency = -604.6319.

| Center<br>Number | Atomic<br>Number | Coordinates (Angstroms) |           |           |
|------------------|------------------|-------------------------|-----------|-----------|
|                  |                  | X                       | Y         | Z         |
| 1                | 6                | 0.499435                | -0.484628 | 0.019842  |
| 2                | 7                | 2.198411                | -0.039091 | 0.063866  |
| 3                | 6                | -0.171878               | 0.853942  | -0.232671 |
| 4                | 1                | 0.408279                | -0.901220 | 1.017265  |
| 5                | 1                | 0.554369                | -1.214492 | -0.776232 |
| 6                | 6                | -1.571176               | 0.447048  | 0.225286  |
| 7                | 1                | 2.795935                | -0.861985 | 0.168179  |
| 8                | 1                | 0.307887                | 1.691815  | 0.303258  |
| 9                | 1                | 2.452069                | 0.436785  | -0.804951 |
| 10               | 1                | 2.388443                | 0.599352  | 0.838995  |
| 11               | 1                | -0.162601               | 1.069483  | -1.307246 |
| 12               | 1                | -2.370180               | 1.064267  | -0.229631 |
| 13               | 1                | -1.635065               | 0.615073  | 1.327987  |
| 14               | 8                | -1.583287               | -0.890452 | -0.132429 |

**Ground State for Oxetane:** E = -249.1170317; TC = 0.133750.

| Center<br>Number | Atomic<br>Number | Coordinates (Angstroms) |           |           |
|------------------|------------------|-------------------------|-----------|-----------|
|                  |                  | X                       | Y         | Z         |
| 1                | 6                | 0.032922                | -0.150866 | 0.023740  |
| 2                | 6                | -0.007354               | -0.172031 | 1.552909  |
| 3                | 1                | 1.045013                | -0.147569 | -0.394214 |
| 4                | 1                | -0.584453               | 0.582979  | -0.497982 |
| 5                | 8                | -0.556755               | -1.488239 | -0.039399 |
| 6                | 6                | -0.283844               | -1.670052 | 1.379178  |
| 7                | 1                | 0.904753                | 0.119885  | 2.075550  |
| 8                | 1                | -0.858913               | 0.374921  | 1.963598  |
| 9                | 1                | -1.143205               | -2.103121 | 1.899163  |

Supplementary Material (ESI) for Organic & Biomolecular Chemistry  
 This journal is (c) The Royal Society of Chemistry 2009

|    |   |          |           |           |
|----|---|----------|-----------|-----------|
| 10 | 1 | 0.597212 | -2.307111 | 1.528419  |
| 11 | 7 | 1.270062 | 2.896724  | 0.371762  |
| 12 | 1 | 1.111042 | 3.224035  | -0.578737 |
| 13 | 1 | 0.676273 | 3.448491  | 0.987165  |
| 14 | 1 | 2.236211 | 3.111527  | 0.608982  |

**Transition State for 2-Fluorooxetane:** E = -348.1659892. TC = 0.125910.  
 Imaginary Frequency = -666.9846.

| Center<br>Number | Atomic<br>Number | Atomic<br>Type | Coordinates (Angstroms) |           |           |
|------------------|------------------|----------------|-------------------------|-----------|-----------|
|                  |                  |                | X                       | Y         | Z         |
| 1                | 1                | 0              | 0.598610                | 0.190363  | -1.277911 |
| 2                | 6                | 0              | 0.789833                | 0.504557  | -0.261467 |
| 3                | 1                | 0              | 1.133687                | 1.519977  | -0.122018 |
| 4                | 7                | 0              | 2.477639                | -0.256496 | -0.160538 |
| 5                | 6                | 0              | 0.103166                | -0.251757 | 0.864540  |
| 6                | 6                | 0              | -1.297130               | 0.084865  | 0.391933  |
| 7                | 1                | 0              | 3.122090                | 0.182305  | -0.820721 |
| 8                | 1                | 0              | 2.419357                | -1.251675 | -0.383636 |
| 9                | 1                | 0              | 2.868740                | -0.165696 | 0.778833  |
| 10               | 1                | 0              | 0.348150                | -1.319227 | 0.913029  |
| 11               | 1                | 0              | 0.319261                | 0.221274  | 1.828599  |
| 12               | 8                | 0              | -1.117298               | 1.224880  | -0.252874 |
| 13               | 1                | 0              | -2.130046               | 0.029450  | 1.107608  |
| 14               | 9                | 0              | -1.628905               | -1.048480 | -0.538563 |

**Ground State for 2-Fluorooxetane:** E = -348.2343011. TC = 0.127032.

| Center<br>Number | Atomic<br>Number | Coordinates (Angstroms) |           |           |
|------------------|------------------|-------------------------|-----------|-----------|
|                  |                  | X                       | Y         | Z         |
| 1                | 6                | 1.699817                | 0.385624  | 0.540001  |
| 2                | 6                | 0.184820                | 0.385034  | 0.393504  |
| 3                | 6                | 1.637579                | -0.873768 | -0.334315 |
| 4                | 1                | 2.033750                | 0.197966  | 1.562350  |
| 5                | 1                | 2.202533                | 1.261935  | 0.129203  |
| 6                | 9                | -0.233813               | 1.352338  | -0.538842 |
| 7                | 1                | 1.930579                | -0.736868 | -1.378389 |
| 8                | 8                | 0.176749                | -0.897644 | -0.200854 |
| 9                | 1                | 2.075452                | -1.788110 | 0.070224  |
| 10               | 1                | -0.499697               | 0.463334  | 1.236126  |
| 11               | 7                | -2.780208               | -0.346405 | 0.224192  |
| 12               | 1                | -3.719933               | -0.730549 | 0.297696  |
| 13               | 1                | -2.817907               | 0.440589  | -0.420552 |
| 14               | 1                | -2.186288               | -1.054690 | -0.204730 |

**Transition State for 3-Fluorooxetane:** E = -348.1447585. TC = 0.125909.  
 Imaginary Frequency = -567.5879.

| Center<br>Number | Atomic<br>Number | Atomic<br>Type | Coordinates (Angstroms) |   |   |
|------------------|------------------|----------------|-------------------------|---|---|
|                  |                  |                | X                       | Y | Z |

Supplementary Material (ESI) for Organic & Biomolecular Chemistry  
 This journal is (c) The Royal Society of Chemistry 2009

|    |   |   |           |           |           |
|----|---|---|-----------|-----------|-----------|
| 1  | 1 | 0 | -0.148234 | -1.166409 | -1.065487 |
| 2  | 6 | 0 | -0.291595 | -0.884547 | -0.028005 |
| 3  | 1 | 0 | -0.299493 | -1.703159 | 0.681662  |
| 4  | 7 | 0 | -2.024801 | -0.586779 | -0.071484 |
| 5  | 6 | 0 | 0.244905  | 0.474317  | 0.378495  |
| 6  | 6 | 0 | 1.598266  | 0.402192  | -0.251193 |
| 7  | 1 | 0 | -2.531166 | -1.407319 | -0.410127 |
| 8  | 1 | 0 | -2.202046 | 0.214272  | -0.681869 |
| 9  | 1 | 0 | -2.377249 | -0.343369 | 0.856897  |
| 10 | 1 | 0 | 0.301294  | 0.576885  | 1.463968  |
| 11 | 8 | 0 | 1.780012  | -0.944440 | 0.085968  |
| 12 | 9 | 0 | -0.665352 | 1.538355  | -0.051338 |
| 13 | 1 | 0 | 2.341817  | 1.093090  | 0.174943  |
| 14 | 1 | 0 | 1.527299  | 0.602014  | -1.341085 |

**Ground State for 3-Fluorooxetane:** E = -348.2183467. TC = 0.126831.

| Center Number | Atomic Number | Atomic Type | Coordinates (Angstroms) |           |           |
|---------------|---------------|-------------|-------------------------|-----------|-----------|
|               |               |             | X                       | Y         | Z         |
| 1             | 1             | 0           | 0.585824                | -1.087887 | -1.871031 |
| 2             | 6             | 0           | 0.334888                | -0.435496 | -1.031950 |
| 3             | 1             | 0           | -0.201538               | 0.461077  | -1.363000 |
| 4             | 6             | 0           | 1.402791                | -0.104328 | 0.000484  |
| 5             | 6             | 0           | 0.333769                | -0.432821 | 1.032618  |
| 6             | 1             | 0           | 2.266446                | -0.772240 | 0.001816  |
| 7             | 1             | 0           | 0.583812                | -1.083057 | 1.873637  |
| 8             | 1             | 0           | -0.203054               | 0.464574  | 1.360774  |
| 9             | 7             | 0           | -2.831075               | 0.701263  | -0.000660 |
| 10            | 1             | 0           | -2.338586               | -0.193181 | -0.000282 |
| 11            | 1             | 0           | -3.433241               | 0.728084  | -0.820683 |
| 12            | 1             | 0           | -3.434504               | 0.728077  | 0.818432  |
| 13            | 8             | 0           | -0.418583               | -1.148572 | 0.000843  |
| 14            | 9             | 0           | 1.879149                | 1.207796  | -0.000966 |

**Transition State for 2,2-Difluorooxetane:** E = -447.2925542. TC = 0.118002. Imaginary Frequency = -661.3743.

| Center Number | Atomic Number | Atomic Type | Coordinates (Angstroms) |           |           |
|---------------|---------------|-------------|-------------------------|-----------|-----------|
|               |               |             | X                       | Y         | Z         |
| 1             | 1             | 0           | -1.207107               | 0.597074  | 1.206649  |
| 2             | 6             | 0           | -1.158997               | 0.545421  | 0.128047  |
| 3             | 1             | 0           | -1.438944               | 1.430412  | -0.423671 |
| 4             | 7             | 0           | -2.893543               | -0.252052 | -0.038268 |
| 5             | 6             | 0           | -0.326956               | -0.540331 | -0.516901 |
| 6             | 6             | 0           | 0.979825                | 0.053145  | -0.023873 |
| 7             | 1             | 0           | -3.626138               | 0.374880  | 0.299069  |
| 8             | 1             | 0           | -2.942529               | -1.116492 | 0.503363  |
| 9             | 1             | 0           | -3.095960               | -0.481269 | -1.012793 |
| 10            | 1             | 0           | -0.537882               | -1.553393 | -0.163764 |
| 11            | 1             | 0           | -0.386840               | -0.498665 | -1.607316 |
| 12            | 9             | 0           | 2.050158                | -0.172203 | -0.901055 |
| 13            | 9             | 0           | 1.379420                | -0.686913 | 1.142236  |
| 14            | 8             | 0           | 0.707595                | 1.299307  | 0.221509  |

**Ground State for 2,2-Difluorooxetane:** E = -447.3536347. TC = 0.119193.

Supplementary Material (ESI) for Organic & Biomolecular Chemistry  
 This journal is (c) The Royal Society of Chemistry 2009

| Center<br>Number | Atomic<br>Number | Atomic<br>Type | Coordinates (Angstroms) |           |           |
|------------------|------------------|----------------|-------------------------|-----------|-----------|
|                  |                  |                | X                       | Y         | Z         |
| 1                | 6                | 0              | 0.060275                | 1.604364  | -0.121331 |
| 2                | 6                | 0              | -0.710009               | -0.273543 | 0.023492  |
| 3                | 6                | 0              | -0.399546               | 0.767629  | 1.078923  |
| 4                | 1                | 0              | 1.110952                | 1.888031  | -0.129128 |
| 5                | 1                | 0              | -0.595311               | 2.428057  | -0.408135 |
| 6                | 1                | 0              | -1.266194               | 1.121495  | 1.637304  |
| 7                | 1                | 0              | 0.412920                | 0.465067  | 1.738598  |
| 8                | 1                | 0              | 2.171838                | -0.405596 | -0.825392 |
| 9                | 7                | 0              | 2.701690                | -0.296428 | 0.038498  |
| 10               | 1                | 0              | 3.675616                | -0.139315 | -0.215580 |
| 11               | 1                | 0              | 2.658456                | -1.192873 | 0.519875  |
| 12               | 9                | 0              | -0.126770               | -1.504787 | 0.148361  |
| 13               | 9                | 0              | -2.041825               | -0.527625 | -0.181509 |
| 14               | 8                | 0              | -0.158384               | 0.451392  | -1.021899 |

**Transition State for *trans*-2,3-Difluorooxetane:** E = -447.2640765. TC = 0.118508. Imaginary frequency = -686.2859.

| Center<br>Number | Atomic<br>Number | Atomic<br>Type | Coordinates (Angstroms) |           |           |
|------------------|------------------|----------------|-------------------------|-----------|-----------|
|                  |                  |                | X                       | Y         | Z         |
| 1                | 1                | 0              | 0.603364                | 0.911722  | -1.440977 |
| 2                | 6                | 0              | 0.838724                | 0.716022  | -0.403875 |
| 3                | 1                | 0              | 1.022388                | 1.555946  | 0.247304  |
| 4                | 7                | 0              | 2.631885                | 0.284284  | -0.614782 |
| 5                | 6                | 0              | 0.406347                | -0.597863 | 0.211807  |
| 6                | 6                | 0              | -1.101912               | -0.598756 | 0.185417  |
| 7                | 1                | 0              | 3.162342                | 1.114658  | -0.884996 |
| 8                | 1                | 0              | 2.792250                | -0.442587 | -1.315715 |
| 9                | 1                | 0              | 2.982414                | -0.047272 | 0.287988  |
| 10               | 1                | 0              | 0.828535                | -1.476006 | -0.293997 |
| 11               | 9                | 0              | -1.402360               | -1.285112 | -1.056975 |
| 12               | 16               | 0              | -1.548512               | 1.104187  | 0.159132  |
| 13               | 9                | 0              | 0.920142                | -0.623257 | 1.527239  |
| 14               | 1                | 0              | -1.557289               | -1.214531 | 0.965290  |

**Ground State for *trans*-2,3-Difluorooxetane:** E = -447.3263376. TC = 0.119514.

| Center<br>Number | Atomic<br>Number | Atomic<br>Type | Coordinates (Angstroms) |           |           |
|------------------|------------------|----------------|-------------------------|-----------|-----------|
|                  |                  |                | X                       | Y         | Z         |
| 1                | 6                | 0              | -0.839896               | 0.695741  | -0.391674 |
| 2                | 1                | 0              | -1.168173               | 0.738294  | -1.433576 |
| 3                | 6                | 0              | -1.155262               | -0.564994 | 0.397990  |
| 4                | 6                | 0              | 0.346848                | -0.828005 | 0.356424  |
| 5                | 1                | 0              | -1.601512               | -0.383924 | 1.377124  |
| 6                | 1                | 0              | 0.884292                | -0.923269 | 1.299512  |



Supplementary Material (ESI) for Organic & Biomolecular Chemistry  
 This journal is (c) The Royal Society of Chemistry 2009

|    |   |   |           |           |           |
|----|---|---|-----------|-----------|-----------|
| 7  | 1 | 0 | 0.631075  | -1.624562 | -0.333394 |
| 8  | 8 | 0 | 0.556712  | 0.498283  | -0.243010 |
| 9  | 9 | 0 | -1.938211 | -1.493639 | -0.285898 |
| 10 | 9 | 0 | -1.246957 | 1.869793  | 0.221164  |
| 11 | 1 | 0 | 2.794518  | 0.488082  | -0.329188 |
| 12 | 7 | 0 | 3.486984  | -0.188503 | -0.010122 |
| 13 | 1 | 0 | 4.096672  | 0.285702  | 0.652926  |
| 14 | 1 | 0 | 4.056926  | -0.448901 | -0.812307 |

**Transition State for *cis*-2,3-Difluorooxetane:** E = -447.2703909. TC = 0.118943.

Imaginary frequency = -632.1895.

| Center<br>Number | Atomic<br>Number | Atomic<br>Type | Coordinates (Angstroms) |           |           |
|------------------|------------------|----------------|-------------------------|-----------|-----------|
|                  |                  |                | X                       | Y         | Z         |
| 1                | 1                | 0              | -0.881658               | -1.844561 | -0.399628 |
| 2                | 6                | 0              | -0.585491               | -0.927320 | 0.092575  |
| 3                | 7                | 0              | -2.325205               | -0.322847 | 0.360133  |
| 4                | 6                | 0              | -0.041329               | 0.257348  | -0.693381 |
| 5                | 6                | 0              | 1.395118                | 0.039385  | -0.311260 |
| 6                | 1                | 0              | -2.858740               | -0.983485 | 0.927740  |
| 7                | 1                | 0              | -2.825292               | -0.168494 | -0.517204 |
| 8                | 1                | 0              | -2.269293               | 0.575891  | 0.842611  |
| 9                | 8                | 0              | 1.339681                | -1.295561 | -0.275589 |
| 10               | 1                | 0              | -0.188388               | 0.125608  | -1.768273 |
| 11               | 1                | 0              | -0.346346               | -0.982540 | 1.145097  |
| 12               | 1                | 0              | 2.190627                | 0.493204  | -0.913933 |
| 13               | 9                | 0              | 1.572372                | 0.641745  | 1.006148  |
| 14               | 9                | 0              | -0.669229               | 1.490734  | -0.357285 |

**Ground State for *cis*-2,3-Difluorooxetane:** E = -447.3265368. TC = 0.119814.

| Center<br>Number | Atomic<br>Number | Atomic<br>Type | Coordinates (Angstroms) |           |           |
|------------------|------------------|----------------|-------------------------|-----------|-----------|
|                  |                  |                | X                       | Y         | Z         |
| 1                | 6                | 0              | -0.623189               | 0.138958  | 1.010344  |
| 2                | 6                | 0              | -0.242003               | 1.059427  | -0.798524 |
| 3                | 6                | 0              | -1.364104               | 0.141616  | -0.325267 |
| 4                | 1                | 0              | -1.133335               | 0.261601  | 1.966920  |
| 5                | 1                | 0              | 2.569883                | 0.325560  | 0.236912  |
| 6                | 7                | 0              | 2.707814                | -0.270544 | -0.577523 |
| 7                | 1                | 0              | 2.426055                | -1.209266 | -0.301582 |
| 8                | 1                | 0              | 3.705375                | -0.294937 | -0.779761 |
| 9                | 8                | 0              | 0.113548                | 1.272346  | 0.622498  |
| 10               | 1                | 0              | -0.513441               | 2.002317  | -1.275882 |
| 11               | 1                | 0              | 0.568891                | 0.545881  | -1.318955 |
| 12               | 1                | 0              | -2.346038               | 0.617487  | -0.270199 |
| 13               | 9                | 0              | -1.501756               | -1.077867 | -0.966207 |
| 14               | 9                | 0              | 0.194568                | -0.985868 | 1.131309  |

**Transition State for 2-Chlorooxetane:** E = -708.1763544. TC = 0.125109.  
 Imaginary Frequency = -686.9536.

| Center<br>Number | Atomic<br>Number | Atomic<br>Type | Coordinates (Angstroms) |           |           |
|------------------|------------------|----------------|-------------------------|-----------|-----------|
|                  |                  |                | X                       | Y         | Z         |
| 1                | 1                | 0              | 0.757271                | -0.189573 | -1.224614 |

Supplementary Material (ESI) for Organic & Biomolecular Chemistry  
 This journal is (c) The Royal Society of Chemistry 2009

|    |    |   |           |           |           |
|----|----|---|-----------|-----------|-----------|
| 2  | 6  | 0 | 1.145216  | 0.410515  | -0.413713 |
| 3  | 1  | 0 | 1.773078  | 1.252019  | -0.672355 |
| 4  | 7  | 0 | 2.613928  | -0.759458 | -0.107339 |
| 5  | 6  | 0 | 0.477546  | 0.299344  | 0.948162  |
| 6  | 6  | 0 | -0.851182 | 0.792460  | 0.429284  |
| 7  | 1  | 0 | 3.252553  | -0.772435 | -0.904375 |
| 8  | 1  | 0 | 2.251852  | -1.705551 | 0.025365  |
| 9  | 1  | 0 | 3.147527  | -0.504435 | 0.725270  |
| 10 | 1  | 0 | 0.508833  | -0.693566 | 1.404981  |
| 11 | 1  | 0 | 0.907824  | 1.036643  | 1.636635  |
| 12 | 8  | 0 | -0.491893 | 1.538686  | -0.586692 |
| 13 | 1  | 0 | -1.625088 | 1.162107  | 1.108914  |
| 14 | 17 | 0 | -1.762688 | -0.917201 | -0.143371 |

**Ground State for 2-Chlorooxetane:** E = -708.2391329. TC = 0.125799.

| Center<br>Number | Atomic<br>Number | Atomic<br>Type | Coordinates (Angstroms) |           |           |
|------------------|------------------|----------------|-------------------------|-----------|-----------|
|                  |                  |                | X                       | Y         | Z         |
| 1                | 6                | 0              | -1.121481               | -1.449750 | -0.071713 |
| 2                | 6                | 0              | 0.785109                | -0.697530 | -0.165801 |
| 3                | 6                | 0              | -0.051119               | -1.214517 | 0.998681  |
| 4                | 1                | 0              | -2.099848               | -1.000931 | 0.099802  |
| 5                | 1                | 0              | -1.208990               | -2.483865 | -0.417834 |
| 6                | 1                | 0              | 0.343174                | -2.080162 | 1.534926  |
| 7                | 1                | 0              | -0.331127               | -0.422005 | 1.693635  |
| 8                | 1                | 0              | -1.493650               | 1.319313  | -0.629371 |
| 9                | 7                | 0              | -1.988104               | 1.678378  | 0.187246  |
| 10               | 1                | 0              | -2.855798               | 2.103796  | -0.134606 |
| 11               | 1                | 0              | -1.413839               | 2.422685  | 0.578216  |
| 12               | 8                | 0              | -0.347423               | -0.657375 | -1.039525 |
| 13               | 1                | 0              | 1.560890                | -1.368635 | -0.544252 |
| 14               | 17               | 0              | 1.560015                | 0.893584  | 0.015174  |

**Transition State for 3-Chlorooxetane:** E = -708.1581466. TC = 0.124998.  
 Imaginary Frequency = -634.933.

| Center<br>Number | Atomic<br>Number | Atomic<br>Type | Coordinates (Angstroms) |           |           |
|------------------|------------------|----------------|-------------------------|-----------|-----------|
|                  |                  |                | X                       | Y         | Z         |
| 1                | 1                | 0              | -0.675334               | 1.913244  | -0.883980 |
| 2                | 6                | 0              | -0.510708               | 1.194171  | -0.090012 |
| 3                | 1                | 0              | -0.797497               | 1.506436  | 0.908393  |
| 4                | 7                | 0              | 1.326633                | 1.748282  | 0.149883  |
| 5                | 6                | 0              | -0.477278               | -0.233209 | -0.381524 |
| 6                | 6                | 0              | -1.510936               | -0.917103 | 0.408508  |
| 7                | 1                | 0              | 1.404433                | 2.699347  | 0.515046  |
| 8                | 1                | 0              | 1.838355                | 1.679038  | -0.731006 |
| 9                | 1                | 0              | 1.756096                | 1.067298  | 0.781573  |
| 10               | 1                | 0              | -0.493007               | -0.478723 | -1.437531 |
| 11               | 7                | 0              | -2.379531               | 0.098852  | -0.224444 |
| 12               | 1                | 0              | -1.376281               | -0.846675 | 1.492893  |
| 13               | 1                | 0              | -1.727844               | -1.941702 | 0.106401  |
| 14               | 1                | 0              | -2.702888               | 0.750811  | 0.504466  |
| 15               | 17               | 0              | 1.478693                | -1.149539 | -0.020950 |

**Ground State for 3-Chlorooxetane:** E = -708.2327824. TC = 0.125835.

| Center<br>Number | Atomic<br>Number | Atomic<br>Type | Coordinates (Angstroms) |   |   |
|------------------|------------------|----------------|-------------------------|---|---|
|                  |                  |                | X                       | Y | Z |

Supplementary Material (ESI) for Organic & Biomolecular Chemistry  
 This journal is (c) The Royal Society of Chemistry 2009

|    |    |   |           |           |           |
|----|----|---|-----------|-----------|-----------|
| 1  | 1  | 0 | 1.154038  | -1.806559 | -1.499678 |
| 2  | 6  | 0 | 0.512907  | -1.040722 | -1.047881 |
| 3  | 1  | 0 | 0.002672  | -0.486849 | -1.842162 |
| 4  | 6  | 0 | 1.265025  | -0.203695 | 0.000478  |
| 5  | 7  | 0 | -0.370385 | -1.622156 | -0.000225 |
| 6  | 6  | 0 | 0.511572  | -1.040182 | 1.048230  |
| 7  | 1  | 0 | 2.356676  | -0.230074 | 0.001119  |
| 8  | 1  | 0 | -1.273540 | -1.137690 | -0.000885 |
| 9  | 1  | 0 | 1.152079  | -1.805815 | 1.501257  |
| 10 | 1  | 0 | 0.000350  | -0.485861 | 1.841556  |
| 11 | 7  | 0 | -2.755521 | 0.410715  | -0.000188 |
| 12 | 1  | 0 | -3.357001 | 0.481863  | -0.818920 |
| 13 | 1  | 0 | -2.140162 | 1.222916  | -0.000468 |
| 14 | 1  | 0 | -3.357260 | 0.482424  | 0.818303  |
| 15 | 17 | 0 | 0.800380  | 1.526666  | -0.000129 |

**Transition State for 2,2-Dichlorooxetane:** E = -1167.2955590. TC = 0.116015. Imaginary Frequency = -673.1374.

| Center Number | Atomic Number | Atomic Type | Coordinates (Angstroms) |           |           |
|---------------|---------------|-------------|-------------------------|-----------|-----------|
|               |               |             | X                       | Y         | Z         |
| 1             | 1             | 0           | 1.714058                | 0.743974  | 0.934130  |
| 2             | 6             | 0           | 1.625977                | -0.267787 | 0.563362  |
| 3             | 1             | 0           | 1.992523                | -1.067001 | 1.191218  |
| 4             | 7             | 0           | 3.298303                | -0.144812 | -0.423097 |
| 5             | 6             | 0           | 0.698533                | -0.544396 | -0.601555 |
| 6             | 6             | 0           | -0.524605               | -0.169607 | 0.208279  |
| 7             | 1             | 0           | 4.095142                | -0.036661 | 0.206743  |
| 8             | 1             | 0           | 3.272765                | 0.667737  | -1.041472 |
| 9             | 1             | 0           | 3.460680                | -0.972541 | -0.998919 |
| 10            | 1             | 0           | 0.886216                | 0.034728  | -1.508765 |
| 11            | 1             | 0           | 0.678841                | -1.613685 | -0.831428 |
| 12            | 8             | 0           | -0.153243               | -0.419748 | 1.429931  |
| 13            | 17            | 0           | -0.810412               | 1.705561  | -0.102948 |
| 14            | 17            | 0           | -2.057932               | -0.969922 | -0.335276 |

**Ground State for 2,2-Dichlorooxetane:** E = -1167.3509392. TC = 0.116715.

| Center Number | Atomic Number | Atomic Type | Coordinates (Angstroms) |           |           |
|---------------|---------------|-------------|-------------------------|-----------|-----------|
|               |               |             | X                       | Y         | Z         |
| 1             | 6             | 0           | -0.541801               | -1.791691 | 0.002126  |
| 2             | 6             | 0           | 0.429442                | 0.001004  | 0.063179  |
| 3             | 6             | 0           | -0.108954               | -0.901739 | 1.169413  |
| 4             | 1             | 0           | -1.590270               | -2.083595 | -0.033076 |
| 5             | 1             | 0           | 0.128967                | -2.624314 | -0.223773 |
| 6             | 1             | 0           | 0.617604                | -1.285233 | 1.885693  |
| 7             | 1             | 0           | -0.968122               | -0.450335 | 1.667137  |
| 8             | 1             | 0           | -2.539045               | 0.149132  | -0.892443 |
| 9             | 7             | 0           | -3.186583               | 0.090032  | -0.107047 |
| 10            | 1             | 0           | -4.092898               | -0.196354 | -0.473906 |
| 11            | 1             | 0           | -3.296659               | 1.034366  | 0.257973  |
| 12            | 8             | 0           | -0.292029               | -0.679290 | -0.935434 |
| 13            | 17            | 0           | 0.022692                | 1.722396  | 0.105613  |
| 14            | 17            | 0           | 2.195579                | -0.168573 | -0.185797 |

**Transition State for *trans*-2,3-Dichlorooxetane @ C<sub>4</sub>:** E = -1167.2897109;  
 TC = 0.116652. Imaginary frequency = -701.1549.

| Center<br>Number | Atomic<br>Number | Atomic<br>Type | Coordinates (Angstroms) |           |           |
|------------------|------------------|----------------|-------------------------|-----------|-----------|
|                  |                  |                | X                       | Y         | Z         |
| 1                | 1                | 0              | -1.203622               | 0.727316  | 1.558214  |
| 2                | 6                | 0              | -0.519917               | 0.894908  | 0.738812  |
| 3                | 7                | 0              | -1.779234               | 1.937393  | -0.234976 |
| 4                | 6                | 0              | -0.300545               | -0.173074 | -0.322942 |
| 5                | 6                | 0              | 0.927612                | -0.734111 | 0.360140  |
| 6                | 1                | 0              | -2.160766               | 2.685018  | 0.347118  |
| 7                | 1                | 0              | -2.551636               | 1.340867  | -0.540663 |
| 8                | 1                | 0              | -1.356010               | 2.364122  | -1.061360 |
| 9                | 8                | 0              | 0.756093                | -0.339238 | 1.598201  |
| 10               | 1                | 0              | 0.205236                | 1.693549  | 0.818014  |
| 11               | 17               | 0              | -1.680595               | -1.316130 | -0.343308 |
| 12               | 17               | 0              | 2.372960                | 0.256200  | -0.582560 |
| 13               | 1                | 0              | 1.246528                | -1.762441 | 0.164064  |
| 14               | 1                | 0              | -0.186935               | 0.196194  | -1.342470 |

**Transition State for *trans*-2,3-Dichlorooxetane @ C<sub>2</sub>:** E = -1167.2623990;  
 TC = 0.116316. Imaginary frequency = -542.4177.

| Center<br>Number | Atomic<br>Number | Atomic<br>Type | Coordinates (Angstroms) |           |           |
|------------------|------------------|----------------|-------------------------|-----------|-----------|
|                  |                  |                | X                       | Y         | Z         |
| 1                | 1                | 0              | -0.716604               | 0.188797  | 1.454563  |
| 2                | 6                | 0              | -0.582270               | -0.091742 | 0.416631  |
| 3                | 7                | 0              | -0.173517               | -1.772493 | 0.684000  |
| 4                | 6                | 0              | 0.605097                | 0.497212  | -0.325399 |
| 5                | 6                | 0              | 0.648062                | 1.853829  | 0.303546  |
| 6                | 1                | 0              | -0.951385               | -2.210013 | 1.184561  |
| 7                | 1                | 0              | 0.691209                | -1.845547 | 1.226925  |
| 8                | 1                | 0              | -0.031614               | -2.270569 | -0.199131 |
| 9                | 1                | 0              | 0.375944                | 0.576963  | -1.387471 |
| 10               | 8                | 0              | -0.742404               | 1.954978  | 0.256477  |
| 11               | 1                | 0              | 1.191661                | 2.601536  | -0.290238 |
| 12               | 1                | 0              | 1.084160                | 1.828120  | 1.321769  |
| 13               | 17               | 0              | 2.189130                | -0.532545 | -0.298208 |
| 14               | 17               | 0              | -2.101768               | -0.388481 | -0.438231 |

**Ground State for *trans*-2,3-Dichlorooxetane:** E = -1167.3491135; TC =  
 117425.

| Center<br>Number | Atomic<br>Number | Atomic<br>Type | Coordinates (Angstroms) |           |           |
|------------------|------------------|----------------|-------------------------|-----------|-----------|
|                  |                  |                | X                       | Y         | Z         |
| 1                | 6                | 0              | 0.055828                | -0.672419 | 0.630937  |
| 2                | 6                | 0              | -0.410135               | 1.296022  | 0.966856  |
| 3                | 6                | 0              | -0.725508               | 0.347149  | -0.186714 |
| 4                | 1                | 0              | -0.558535               | -1.341125 | 1.241256  |
| 5                | 1                | 0              | 2.339991                | 1.333223  | -0.039810 |
| 6                | 7                | 0              | 2.182982                | 1.704335  | -0.976902 |
| 7                | 1                | 0              | 2.639405                | 1.067251  | -1.627506 |

Supplementary Material (ESI) for Organic & Biomolecular Chemistry  
 This journal is (c) The Royal Society of Chemistry 2009

|    |    |   |           |           |           |
|----|----|---|-----------|-----------|-----------|
| 8  | 1  | 0 | 2.670044  | 2.596930  | -1.041965 |
| 9  | 8  | 0 | 0.646568  | 0.378415  | 1.411424  |
| 10 | 1  | 0 | -1.205222 | 1.365658  | 1.715546  |
| 11 | 1  | 0 | -0.003337 | 2.274467  | 0.709396  |
| 12 | 17 | 0 | -2.412194 | -0.018453 | -0.557194 |
| 13 | 1  | 0 | -0.201409 | 0.635286  | -1.097255 |
| 14 | 17 | 0 | 1.255990  | -1.670598 | -0.194524 |

**Transition State for *cis*-2,3-Dichlorooxetane @ C<sub>4</sub>:** E = -1167.2900390; TC = 0.116868. Imaginary frequency = -647.8649.

| Center Number | Atomic Number | Atomic Type | Coordinates (Angstroms) |           |           |
|---------------|---------------|-------------|-------------------------|-----------|-----------|
|               |               |             | X                       | Y         | Z         |
| 1             | 1             | 0           | 1.040319                | 2.200480  | -0.293714 |
| 2             | 6             | 0           | 0.661982                | 1.278061  | 0.126898  |
| 3             | 7             | 0           | 2.331867                | 0.794152  | 0.822039  |
| 4             | 6             | 0           | 0.330432                | 0.089401  | -0.775281 |
| 5             | 6             | 0           | -1.163884               | 0.309806  | -0.741793 |
| 6             | 1             | 0           | 2.684917                | 1.565244  | 1.392252  |
| 7             | 1             | 0           | 3.021202                | 0.581739  | 0.098270  |
| 8             | 1             | 0           | 2.239156                | -0.038293 | 1.406891  |
| 9             | 8             | 0           | -1.111998               | 1.641265  | -0.663245 |
| 10            | 1             | 0           | 0.677040                | 0.297647  | -1.789819 |
| 11            | 1             | 0           | 0.188566                | 1.324019  | 1.098165  |
| 12            | 17            | 0           | -1.886986               | -0.512729 | 0.802284  |
| 13            | 1             | 0           | -1.768096               | -0.130149 | -1.542148 |
| 14            | 17            | 0           | 1.035141                | -1.519828 | -0.359763 |

**Transition State for *cis*-2,3-Dichlorooxetane @ C<sub>2</sub>:** E = -1167.2612435; TC = 0.116275. Imaginary frequency = -612.4285.

| Center Number | Atomic Number | Atomic Type | Coordinates (Angstroms) |           |           |
|---------------|---------------|-------------|-------------------------|-----------|-----------|
|               |               |             | X                       | Y         | Z         |
| 1             | 1             | 0           | -1.190879               | -0.266238 | 1.521445  |
| 2             | 6             | 0           | -0.605106               | -0.276583 | 0.612158  |
| 3             | 7             | 0           | 0.168086                | -1.830243 | 0.902175  |
| 4             | 6             | 0           | 0.588248                | 0.664289  | 0.454813  |
| 5             | 6             | 0           | -0.085525               | 1.874047  | -0.122639 |
| 6             | 1             | 0           | -0.562736               | -2.523024 | 1.083654  |
| 7             | 1             | 0           | 0.800569                | -1.782761 | 1.706661  |
| 8             | 1             | 0           | 0.713683                | -2.117164 | 0.084202  |
| 9             | 8             | 0           | -1.237389               | 1.712750  | 0.642090  |
| 10            | 1             | 0           | -0.230908               | 1.764472  | -1.213603 |
| 11            | 1             | 0           | 0.470959                | 2.808137  | 0.056371  |
| 12            | 17            | 0           | -1.521039               | -0.711973 | -0.816079 |
| 13            | 1             | 0           | 0.972636                | 0.882465  | 1.454729  |
| 14            | 17            | 0           | 2.013008                | -0.066068 | -0.466944 |

**Ground State for *cis*-2,3-Dichlorooxetane:** E = -1167.3459604; TC = 0.117475.

| Center Number | Atomic Number | Atomic Type | Coordinates (Angstroms) |           |          |
|---------------|---------------|-------------|-------------------------|-----------|----------|
|               |               |             | X                       | Y         | Z        |
| 1             | 6             | 0           | 0.123575                | 0.448025  | 1.082977 |
| 2             | 6             | 0           | -0.191331               | -1.443600 | 0.314217 |
| 3             | 6             | 0           | 1.078119                | -0.630212 | 0.544411 |
| 4             | 1             | 0           | 0.364136                | 0.953099  | 2.018760 |

Supplementary Material (ESI) for Organic & Biomolecular Chemistry  
 This journal is (c) The Royal Society of Chemistry 2009

|    |    |   |           |           |           |
|----|----|---|-----------|-----------|-----------|
| 5  | 1  | 0 | -2.858846 | -0.405127 | -0.047461 |
| 6  | 7  | 0 | -3.047933 | -0.673995 | -1.012352 |
| 7  | 1  | 0 | -3.018786 | 0.176223  | -1.571546 |
| 8  | 1  | 0 | -3.998790 | -1.035214 | -1.055772 |
| 9  | 8  | 0 | -0.891633 | -0.535144 | 1.239276  |
| 10 | 1  | 0 | -0.215397 | -2.471702 | 0.679684  |
| 11 | 1  | 0 | -0.618704 | -1.364522 | -0.687820 |
| 12 | 17 | 0 | -0.326297 | 1.717481  | -0.084727 |
| 13 | 1  | 0 | 1.676068  | -1.027333 | 1.366744  |
| 14 | 17 | 0 | 2.154340  | -0.309927 | -0.808212 |

**Transition State for 2-Bromooxetane:** E = -2821.3727433. TC = 0.124741.  
 Imaginary Frequency = -684.5784.

| Center<br>Number | Atomic<br>Number | Atomic<br>Type | Coordinates (Angstroms) |           |           |
|------------------|------------------|----------------|-------------------------|-----------|-----------|
|                  |                  |                | X                       | Y         | Z         |
| 1                | 1                | 0              | -2.511043               | 0.927200  | -0.773925 |
| 2                | 6                | 0              | -1.683272               | 0.314953  | -0.442956 |
| 3                | 1                | 0              | -1.127246               | -0.233526 | -1.190052 |
| 4                | 7                | 0              | -2.822613               | -1.222971 | -0.089514 |
| 5                | 6                | 0              | -1.081542               | 0.445450  | 0.949264  |
| 6                | 6                | 0              | 0.095692                | 1.221089  | 0.427239  |
| 7                | 1                | 0              | -3.408757               | -1.453582 | -0.893385 |
| 8                | 1                | 0              | -3.430465               | -1.099506 | 0.721485  |
| 9                | 1                | 0              | -2.208786               | -2.019281 | 0.092543  |
| 10               | 1                | 0              | -1.711508               | 1.096062  | 1.569583  |
| 11               | 1                | 0              | -0.887328               | -0.492598 | 1.472003  |
| 12               | 8                | 0              | -0.383826               | 1.774269  | -0.648886 |
| 13               | 1                | 0              | 0.785263                | 1.778957  | 1.064814  |
| 14               | 35               | 0              | 1.524100                | -0.457887 | -0.052762 |

**Ground State for 2-Bromooxetane:** E = -2821.4298769. TC = 0.125363.

| Center<br>Number | Atomic<br>Number | Atomic<br>Type | Coordinates (Angstroms) |           |           |
|------------------|------------------|----------------|-------------------------|-----------|-----------|
|                  |                  |                | X                       | Y         | Z         |
| 1                | 6                | 0              | -2.104489               | -0.887271 | -0.027979 |
| 2                | 6                | 0              | -0.071880               | -1.048061 | -0.230930 |
| 3                | 6                | 0              | -0.988977               | -1.231421 | 0.967899  |
| 4                | 1                | 0              | -2.749890               | -0.047659 | 0.228845  |
| 5                | 1                | 0              | -2.676323               | -1.742959 | -0.397613 |
| 6                | 1                | 0              | -0.994699               | -2.223525 | 1.424356  |
| 7                | 1                | 0              | -0.859704               | -0.458494 | 1.725866  |
| 8                | 1                | 0              | -1.345382               | 1.799676  | -0.635363 |
| 9                | 7                | 0              | -1.644930               | 2.301884  | 0.200291  |
| 10               | 1                | 0              | -2.248703               | 3.067599  | -0.094336 |
| 11               | 1                | 0              | -0.809397               | 2.715965  | 0.609199  |
| 12               | 8                | 0              | -1.103791               | -0.482724 | -1.032593 |
| 13               | 35               | 0              | 1.447595                | 0.159634  | 0.012069  |
| 14               | 1                | 0              | 0.355190                | -1.948662 | -0.678595 |

**Transition State for 2,2-Dibromooxetane:** E = -5393.6825262. TC =  
 0.115244. Imaginary Frequency = -667.6424.

| Center<br>Number | Atomic<br>Number | Atomic<br>Type | Coordinates (Angstroms) |          |          |
|------------------|------------------|----------------|-------------------------|----------|----------|
|                  |                  |                | X                       | Y        | Z        |
| 1                | 1                | 0              | 2.351487                | 0.227389 | 0.912702 |

Supplementary Material (ESI) for Organic & Biomolecular Chemistry  
 This journal is (c) The Royal Society of Chemistry 2009

|    |    |   |           |           |           |
|----|----|---|-----------|-----------|-----------|
| 2  | 6  | 0 | 2.066916  | -0.759900 | 0.575481  |
| 3  | 1  | 0 | 2.352941  | -1.607465 | 1.181708  |
| 4  | 7  | 0 | 3.715978  | -0.912580 | -0.527195 |
| 5  | 6  | 0 | 1.063515  | -0.893607 | -0.553602 |
| 6  | 6  | 0 | -0.035922 | -0.341909 | 0.319465  |
| 7  | 1  | 0 | 4.558519  | -0.939609 | 0.049394  |
| 8  | 1  | 0 | 3.783288  | -0.099500 | -1.141609 |
| 9  | 1  | 0 | 3.710132  | -1.748295 | -1.113868 |
| 10 | 1  | 0 | 1.287359  | -0.341437 | -1.467475 |
| 11 | 1  | 0 | 0.871843  | -1.948037 | -0.777338 |
| 12 | 8  | 0 | 0.353368  | -0.626603 | 1.521363  |
| 13 | 35 | 0 | -1.871464 | -0.893497 | -0.178603 |
| 14 | 35 | 0 | -0.023434 | 1.745792  | -0.054886 |

**Ground State for 2,2-Dibromooxetane:** E = -5393.7320608. TC = 0.115861.

| Center<br>Number | Atomic<br>Number | Atomic<br>Type | Coordinates (Angstroms) |           |           |
|------------------|------------------|----------------|-------------------------|-----------|-----------|
|                  |                  |                | X                       | Y         | Z         |
| 1                | 6                | 0              | 0.586908                | 2.197622  | 0.077964  |
| 2                | 6                | 0              | -0.055487               | 0.273823  | 0.079744  |
| 3                | 6                | 0              | 0.365016                | 1.192569  | 1.214287  |
| 4                | 1                | 0              | 1.565037                | 2.672874  | 0.023699  |
| 5                | 1                | 0              | -0.233484               | 2.899681  | -0.089674 |
| 6                | 1                | 0              | -0.380135               | 1.410562  | 1.978806  |
| 7                | 1                | 0              | 1.316850                | 0.877396  | 1.645165  |
| 8                | 1                | 0              | 2.880819                | 0.708941  | -0.973628 |
| 9                | 7                | 0              | 3.505708                | 0.882445  | -0.186760 |
| 10               | 1                | 0              | 4.329948                | 1.361690  | -0.546564 |
| 11               | 1                | 0              | 3.813724                | -0.027967 | 0.150285  |
| 12               | 8                | 0              | 0.503073                | 1.093986  | -0.907783 |
| 13               | 35               | 0              | 0.664158                | -1.520918 | 0.050453  |
| 14               | 35               | 0              | -2.013756               | 0.183311  | -0.103323 |

**Transition State for Thietane:** E = -571.7540722; TC = 0.132922.

Imaginary frequency = -597.4165.

| Center<br>Number | Atomic<br>Number | Coordinates (Angstroms) |           |           |
|------------------|------------------|-------------------------|-----------|-----------|
|                  |                  | X                       | Y         | Z         |
| 1                | 6                | -0.800811               | -0.483616 | 0.048811  |
| 2                | 6                | -0.338887               | 0.914188  | -0.329446 |
| 3                | 1                | -0.783739               | -1.280585 | -0.680088 |
| 4                | 1                | -0.670239               | -0.797013 | 1.078234  |
| 5                | 7                | -2.594214               | -0.256532 | 0.071594  |
| 6                | 6                | 1.049837                | 1.031883  | 0.266442  |
| 7                | 1                | -0.279009               | 0.980169  | -1.421400 |
| 8                | 1                | -1.044745               | 1.688394  | 0.024148  |
| 9                | 1                | -3.066442               | -1.148921 | 0.231068  |
| 10               | 1                | -2.874380               | 0.395175  | 0.807616  |
| 11               | 1                | -2.909887               | 0.120822  | -0.824920 |
| 12               | 16               | 1.733067                | -0.626185 | -0.049350 |
| 13               | 1                | 1.628205                | 1.845941  | -0.184193 |
| 14               | 1                | 0.969828                | 1.235976  | 1.343143  |

Supplementary Material (ESI) for Organic & Biomolecular Chemistry  
 This journal is (c) The Royal Society of Chemistry 2009

**Ground State for Thietane:** E = -571.8346074; TC = 0.131899.

| Center<br>Number | Atomic<br>Number | Coordinates (Angstroms) |           |           |
|------------------|------------------|-------------------------|-----------|-----------|
|                  |                  | X                       | Y         | Z         |
| 1                | 6                | -0.644158               | 0.319772  | 1.132270  |
| 2                | 6                | -1.217995               | 1.184874  | -0.000021 |
| 3                | 1                | -1.281764               | 0.157127  | 2.003839  |
| 4                | 1                | 0.346713                | 0.656697  | 1.445034  |
| 5                | 16               | -0.517510               | -1.126893 | -0.000086 |
| 6                | 6                | -0.643755               | 0.319905  | -1.132221 |
| 7                | 1                | -2.310758               | 1.138198  | -0.000249 |
| 8                | 1                | -0.902810               | 2.233522  | 0.000081  |
| 9                | 1                | -1.281088               | 0.157473  | -2.004043 |
| 10               | 1                | 0.347196                | 0.656935  | -1.444624 |
| 11               | 7                | 2.780856                | 0.302685  | 0.000099  |
| 12               | 1                | 2.169946                | -0.513966 | 0.000336  |
| 13               | 1                | 3.381022                | 0.238950  | -0.819485 |
| 14               | 1                | 3.381157                | 0.239254  | 0.819618  |

**Transition State for 2-Fluorothietane:** E = -670.8600962; TC = 0.124438.  
 Imaginary Frequency = -598.8709.

| Center<br>Number | Atomic<br>Number | Atomic<br>Type | Coordinates (Angstroms) |           |           |
|------------------|------------------|----------------|-------------------------|-----------|-----------|
|                  |                  |                | X                       | Y         | Z         |
| 1                | 1                | 0              | 1.224838                | -0.929011 | 1.032545  |
| 2                | 6                | 0              | 1.185912                | -0.501434 | 0.038263  |
| 3                | 1                | 0              | 1.306974                | -1.198522 | -0.776506 |
| 4                | 7                | 0              | 2.923114                | 0.143439  | 0.001955  |
| 5                | 6                | 0              | 0.408932                | 0.780680  | -0.167548 |
| 6                | 6                | 0              | -0.957550               | 0.453619  | 0.391253  |
| 7                | 1                | 0              | 3.593931                | -0.626857 | 0.035913  |
| 8                | 1                | 0              | 3.105829                | 0.767060  | 0.790675  |
| 9                | 1                | 0              | 3.078173                | 0.668481  | -0.861418 |
| 10               | 1                | 0              | 0.883267                | 1.650232  | 0.313854  |
| 11               | 16               | 0              | -1.231647               | -1.240536 | -0.069627 |
| 12               | 1                | 0              | -1.002918               | 0.611663  | 1.475406  |
| 13               | 1                | 0              | 0.296577                | 0.983726  | -1.236865 |
| 14               | 9                | 0              | -1.896209               | 1.391171  | -0.138341 |

**Ground State for 2-Fluorothietane:** E = -670.9365445; TC = 0.124642.

| Center<br>Number | Atomic<br>Number | Atomic<br>Type | Coordinates (Angstroms) |           |           |
|------------------|------------------|----------------|-------------------------|-----------|-----------|
|                  |                  |                | X                       | Y         | Z         |
| 1                | 6                | 0              | 0.872867                | -1.250542 | 0.614890  |
| 2                | 6                | 0              | 0.619169                | 0.979898  | 0.198041  |
| 3                | 6                | 0              | 0.399665                | 0.012979  | 1.358140  |
| 4                | 1                | 0              | 0.148716                | -2.066008 | 0.600850  |
| 5                | 1                | 0              | 1.846944                | -1.619743 | 0.939080  |
| 6                | 1                | 0              | 0.959575                | 0.259547  | 2.265250  |
| 7                | 1                | 0              | -0.666937               | -0.041381 | 1.584888  |
| 8                | 1                | 0              | -1.921613               | -0.736417 | -0.882776 |
| 9                | 7                | 0              | -2.560374               | -0.698958 | -0.089846 |
| 10               | 1                | 0              | -3.403436               | -1.208900 | -0.346714 |
| 11               | 1                | 0              | -2.817009               | 0.279601  | 0.025459  |
| 12               | 1                | 0              | 1.415342                | 1.719233  | 0.299168  |
| 13               | 9                | 0              | -0.536812               | 1.714231  | -0.125487 |



Supplementary Material (ESI) for Organic & Biomolecular Chemistry  
 This journal is (c) The Royal Society of Chemistry 2009

14 16 0 0.990134 -0.348457 -0.984583

**Transition State for 2-Chlorothietane:** E = -1030.8763006; TC = 0.123652.  
 Imaginary Frequency = -619.6849.

| Center<br>Number | Atomic<br>Number | Atomic<br>Type | Coordinates (Angstroms) |           |           |
|------------------|------------------|----------------|-------------------------|-----------|-----------|
|                  |                  |                | X                       | Y         | Z         |
| 1                | 1                | 0              | 0.909944                | 0.132592  | -1.234156 |
| 2                | 6                | 0              | 1.235058                | 0.549076  | -0.290648 |
| 3                | 1                | 0              | 1.682840                | 1.532019  | -0.328963 |
| 4                | 7                | 0              | 2.839703                | -0.384501 | -0.229666 |
| 5                | 6                | 0              | 0.593360                | 0.032307  | 0.986250  |
| 6                | 6                | 0              | -0.883930               | 0.051816  | 0.666032  |
| 7                | 1                | 0              | 3.446987                | -0.101162 | -1.001133 |
| 8                | 1                | 0              | 2.645209                | -1.384102 | -0.320947 |
| 9                | 1                | 0              | 3.340498                | -0.232561 | 0.648329  |
| 10               | 1                | 0              | 0.970599                | -0.955275 | 1.292100  |
| 11               | 1                | 0              | 0.784894                | 0.742507  | 1.797323  |
| 12               | 1                | 0              | -1.535646               | -0.026169 | 1.537408  |
| 13               | 17               | 0              | -1.244915               | -1.509182 | -0.269985 |
| 14               | 16               | 0              | -1.039163               | 1.552535  | -0.272647 |

**Ground State for 2-Chlorothietane:** E = -1030.9471234; TC = 0.123628.

| Center<br>Number | Atomic<br>Number | Atomic<br>Type | Coordinates (Angstroms) |           |           |
|------------------|------------------|----------------|-------------------------|-----------|-----------|
|                  |                  |                | X                       | Y         | Z         |
| 1                | 6                | 0              | -1.878156               | 0.115558  | 0.567606  |
| 2                | 6                | 0              | 0.051346                | -1.016105 | 0.267588  |
| 3                | 6                | 0              | -0.560600               | -0.103513 | 1.330201  |
| 4                | 1                | 0              | -2.250950               | 1.141303  | 0.562631  |
| 5                | 1                | 0              | -2.674829               | -0.572144 | 0.859608  |
| 6                | 1                | 0              | -0.641262               | -0.546316 | 2.328428  |
| 7                | 1                | 0              | -0.010182               | 0.838415  | 1.379937  |
| 8                | 1                | 0              | 0.312013                | 2.172888  | -0.841271 |
| 9                | 7                | 0              | 0.659283                | 2.732386  | -0.063331 |
| 10               | 1                | 0              | 0.539456                | 3.713500  | -0.308427 |
| 11               | 1                | 0              | 1.659605                | 2.555886  | 0.007000  |
| 12               | 1                | 0              | -0.099413               | -2.080201 | 0.455479  |
| 13               | 17               | 0              | 1.791666                | -0.816287 | -0.041881 |
| 14               | 16               | 0              | -1.098955               | -0.403050 | -1.017529 |

**Transition State for 2,2-Difluorothietane:** E = -769.9765115; TC =  
 0.116387. Imaginary Frequency = -602.1306.

| Center<br>Number | Atomic<br>Number | Atomic<br>Type | Coordinates (Angstroms) |           |           |
|------------------|------------------|----------------|-------------------------|-----------|-----------|
|                  |                  |                | X                       | Y         | Z         |
| 1                | 1                | 0              | -1.265254               | 0.709525  | 1.093722  |
| 2                | 6                | 0              | -1.302952               | 0.557293  | 0.023764  |
| 3                | 1                | 0              | -1.559801               | 1.413001  | -0.582343 |
| 4                | 7                | 0              | -3.035257               | -0.190250 | 0.008828  |
| 5                | 6                | 0              | -0.522178               | -0.596071 | -0.567718 |
| 6                | 6                | 0              | 0.862570                | -0.340022 | -0.026586 |
| 7                | 1                | 0              | -3.727208               | 0.502361  | 0.301521  |
| 8                | 1                | 0              | -3.080602               | -0.982787 | 0.652527  |
| 9                | 1                | 0              | -3.286395               | -0.521693 | -0.924816 |
| 10               | 1                | 0              | -0.900967               | -1.583013 | -0.270088 |
| 11               | 1                | 0              | -0.499104               | -0.524656 | -1.657905 |

Supplementary Material (ESI) for Organic & Biomolecular Chemistry  
 This journal is (c) The Royal Society of Chemistry 2009

|    |    |   |          |           |           |
|----|----|---|----------|-----------|-----------|
| 12 | 9  | 0 | 1.819206 | -1.051302 | -0.741457 |
| 13 | 9  | 0 | 0.906881 | -0.930043 | 1.259006  |
| 14 | 16 | 0 | 1.050419 | 1.401495  | 0.005680  |

**Ground State for 2,2-Difluorothietane:** E = -770.0446942; TC = 0.116574.

| Center<br>Number | Atomic<br>Number | Atomic<br>Type | Coordinates (Angstroms) |           |           |
|------------------|------------------|----------------|-------------------------|-----------|-----------|
|                  |                  |                | X                       | Y         | Z         |
| 1                | 6                | 0              | 2.019506                | 0.717393  | 0.000023  |
| 2                | 6                | 0              | 0.163364                | -0.576441 | -0.000006 |
| 3                | 6                | 0              | 1.670526                | -0.784306 | -0.000016 |
| 4                | 1                | 0              | 2.553336                | 1.048688  | -0.891816 |
| 5                | 1                | 0              | 2.553277                | 1.048652  | 0.891910  |
| 6                | 1                | 0              | 1.999046                | -1.322067 | 0.892612  |
| 7                | 1                | 0              | 1.999032                | -1.322006 | -0.892686 |
| 8                | 1                | 0              | -2.832082               | -0.017138 | -0.820828 |
| 9                | 7                | 0              | -2.663139               | 0.561087  | 0.000005  |
| 10               | 1                | 0              | -2.831877               | -0.017373 | 0.820719  |
| 11               | 1                | 0              | -3.354379               | 1.308875  | 0.000191  |
| 12               | 9                | 0              | -0.472228               | -1.130378 | -1.090669 |
| 13               | 9                | 0              | -0.472201               | -1.130354 | 1.090690  |
| 14               | 16               | 0              | 0.245944                | 1.221966  | -0.000021 |

**Transition State for 2,2-Dichlorothietane:** E = -1489.9868424; TC = 0.114471. Imaginary Frequency = -611.5129.

| Center<br>Number | Atomic<br>Number | Atomic<br>Type | Coordinates (Angstroms) |           |           |
|------------------|------------------|----------------|-------------------------|-----------|-----------|
|                  |                  |                | X                       | Y         | Z         |
| 1                | 1                | 0              | 1.806451                | 0.109136  | -1.089781 |
| 2                | 6                | 0              | 1.750308                | 0.513724  | -0.088325 |
| 3                | 1                | 0              | 2.169460                | 1.497502  | 0.065440  |
| 4                | 7                | 0              | 3.253509                | -0.421350 | 0.548237  |
| 5                | 6                | 0              | 0.702182                | -0.029941 | 0.861321  |
| 6                | 6                | 0              | -0.565268               | 0.070932  | 0.039681  |
| 7                | 1                | 0              | 4.099607                | -0.109903 | 0.067132  |
| 8                | 1                | 0              | 3.130794                | -1.420672 | 0.370875  |
| 9                | 1                | 0              | 3.386843                | -0.287612 | 1.552840  |
| 10               | 1                | 0              | 0.908367                | -1.048287 | 1.218120  |
| 11               | 1                | 0              | 0.609784                | 0.636743  | 1.723405  |
| 12               | 16               | 0              | -0.359093               | 1.592794  | -0.821776 |
| 13               | 17               | 0              | -2.021920               | -0.071127 | 1.090857  |
| 14               | 17               | 0              | -0.593593               | -1.413606 | -1.059877 |

**Ground State for 2,2-Dichlorothietane:** E = -1490.0538408. TC = 0.114496.

| Center<br>Number | Atomic<br>Number | Atomic<br>Type | Coordinates (Angstroms) |           |          |
|------------------|------------------|----------------|-------------------------|-----------|----------|
|                  |                  |                | X                       | Y         | Z        |
| 1                | 6                | 0              | -0.401332               | -1.884341 | 0.481688 |
| 2                | 6                | 0              | 0.489483                | 0.143450  | 0.069570 |
| 3                | 6                | 0              | -0.233047               | -0.552281 | 1.226470 |
| 4                | 1                | 0              | -1.378864               | -2.355956 | 0.594527 |
| 5                | 1                | 0              | 0.397680                | -2.602920 | 0.675072 |
| 6                | 1                | 0              | 0.327074                | -0.575581 | 2.165310 |
| 7                | 1                | 0              | -1.214917               | -0.095095 | 1.371119 |

Supplementary Material (ESI) for Organic & Biomolecular Chemistry  
 This journal is (c) The Royal Society of Chemistry 2009

|    |    |   |           |           |           |
|----|----|---|-----------|-----------|-----------|
| 8  | 1  | 0 | -2.914605 | 0.175056  | -0.595558 |
| 9  | 7  | 0 | -3.332217 | 0.370754  | 0.313516  |
| 10 | 1  | 0 | -4.294747 | 0.038555  | 0.286568  |
| 11 | 1  | 0 | -3.365545 | 1.383532  | 0.415182  |
| 12 | 17 | 0 | 0.045821  | 1.837461  | -0.216642 |
| 13 | 16 | 0 | -0.167589 | -1.053599 | -1.142273 |
| 14 | 17 | 0 | 2.267135  | 0.048053  | 0.246240  |

**Transition State for 2-Bromothietane:** E = -3144.0713972; TC = 0.123161.  
 Imaginary Frequency = -629.2544.

| Center<br>Number | Atomic<br>Number | Atomic<br>Type | Coordinates (Angstroms) |           |           |
|------------------|------------------|----------------|-------------------------|-----------|-----------|
|                  |                  |                | X                       | Y         | Z         |
| 1                | 1                | 0              | -2.625110               | 0.723839  | -0.476221 |
| 2                | 6                | 0              | -1.749274               | 0.107439  | -0.328026 |
| 3                | 1                | 0              | -1.193858               | -0.168557 | -1.213591 |
| 4                | 7                | 0              | -2.688184               | -1.519183 | -0.236466 |
| 5                | 6                | 0              | -1.045892               | 0.048840  | 1.019032  |
| 6                | 6                | 0              | 0.256415                | 0.756724  | 0.739240  |
| 7                | 1                | 0              | -3.295532               | -1.632748 | -1.050213 |
| 8                | 1                | 0              | -3.259915               | -1.598912 | 0.606797  |
| 9                | 1                | 0              | -2.002796               | -2.278032 | -0.235858 |
| 10               | 1                | 0              | -1.612760               | 0.643663  | 1.744451  |
| 11               | 1                | 0              | -0.935606               | -0.970498 | 1.414818  |
| 12               | 1                | 0              | 0.843302                | 1.038679  | 1.613639  |
| 13               | 35               | 0              | 1.482749                | -0.670350 | -0.111557 |
| 14               | 16               | 0              | -0.235259               | 2.053817  | -0.339096 |

**Ground State for 2-Bromothietane:** E = -3144.1395738; TC = 0.123169.

| Center<br>Number | Atomic<br>Number | Atomic<br>Type | Coordinates (Angstroms) |           |           |
|------------------|------------------|----------------|-------------------------|-----------|-----------|
|                  |                  |                | X                       | Y         | Z         |
| 1                | 6                | 0              | -2.264139               | -0.589340 | 0.539015  |
| 2                | 6                | 0              | -0.059472               | -0.941503 | 0.276838  |
| 3                | 6                | 0              | -0.973076               | -0.340823 | 1.340979  |
| 4                | 1                | 0              | -2.979463               | 0.234955  | 0.539172  |
| 5                | 1                | 0              | -2.765311               | -1.526192 | 0.792206  |
| 6                | 1                | 0              | -0.906795               | -0.815791 | 2.325191  |
| 7                | 1                | 0              | -0.809680               | 0.735066  | 1.428534  |
| 8                | 1                | 0              | -0.977822               | 2.096640  | -0.814813 |
| 9                | 7                | 0              | -0.994594               | 2.759570  | -0.040901 |
| 10               | 1                | 0              | -1.555339               | 3.559615  | -0.328320 |
| 11               | 1                | 0              | -0.040000               | 3.088451  | 0.091127  |
| 12               | 1                | 0              | 0.199852                | -1.988057 | 0.440781  |
| 13               | 16               | 0              | -1.312433               | -0.749891 | -1.031567 |
| 14               | 35               | 0              | 1.645022                | -0.042098 | -0.017814 |

**Transition State for 2,2-Dibromothietane:** E = -5716.3740782; TC = 0.113702.  
 Imaginary frequency = -619.9768.

| Center<br>Number | Atomic<br>Number | Atomic<br>Type | Coordinates (Angstroms) |           |           |
|------------------|------------------|----------------|-------------------------|-----------|-----------|
|                  |                  |                | X                       | Y         | Z         |
| 1                | 1                | 0              | 2.406375                | 0.070617  | 0.725740  |
| 2                | 6                | 0              | 2.140074                | -0.859387 | 0.242390  |
| 3                | 1                | 0              | 2.539047                | -1.770295 | 0.666055  |
| 4                | 7                | 0              | 3.494339                | -0.691595 | -1.099154 |

Supplementary Material (ESI) for Organic & Biomolecular Chemistry  
 This journal is (c) The Royal Society of Chemistry 2009

|    |    |   |           |           |           |
|----|----|---|-----------|-----------|-----------|
| 5  | 6  | 0 | 0.929182  | -0.897545 | -0.670008 |
| 6  | 6  | 0 | -0.130053 | -0.302731 | 0.224464  |
| 7  | 1  | 0 | 4.428635  | -0.751959 | -0.689919 |
| 8  | 1  | 0 | 3.393430  | 0.225939  | -1.538515 |
| 9  | 1  | 0 | 3.414688  | -1.406774 | -1.824810 |
| 10 | 1  | 0 | 1.053765  | -0.364191 | -1.620617 |
| 11 | 16 | 0 | 0.239007  | -0.939791 | 1.798295  |
| 12 | 1  | 0 | 0.663682  | -1.939637 | -0.876245 |
| 13 | 35 | 0 | -1.935943 | -0.632953 | -0.499612 |
| 14 | 35 | 0 | 0.112534  | 1.723584  | 0.079572  |

**Ground State for 2,2-Dibromothietane:** E = -5716.4364077; TC = 0.113718.

| Center<br>Number | Atomic<br>Number | Atomic<br>Type | Coordinates (Angstroms) |           |           |
|------------------|------------------|----------------|-------------------------|-----------|-----------|
|                  |                  |                | X                       | Y         | Z         |
| 1                | 6                | 0              | -0.476701               | 2.301449  | -0.364139 |
| 2                | 6                | 0              | 0.106078                | 0.168296  | -0.054738 |
| 3                | 6                | 0              | -0.446006               | 1.011315  | -1.200531 |
| 4                | 1                | 0              | -1.362154               | 2.924864  | -0.500589 |
| 5                | 1                | 0              | 0.436552                | 2.895511  | -0.442056 |
| 6                | 1                | 0              | 0.162527                | 1.016550  | -2.108412 |
| 7                | 1                | 0              | -1.473762               | 0.706427  | -1.416113 |
| 8                | 1                | 0              | -3.221999               | 0.439307  | 0.462264  |
| 9                | 7                | 0              | -3.671052               | 0.482607  | -0.451657 |
| 10               | 1                | 0              | -4.526255               | 1.026674  | -0.349100 |
| 11               | 1                | 0              | -3.946137               | -0.467025 | -0.696155 |
| 12               | 16               | 0              | -0.490345               | 1.327872  | 1.201415  |
| 13               | 35               | 0              | -0.571648               | -1.640890 | 0.095185  |
| 14               | 35               | 0              | 2.068045                | 0.096523  | -0.132169 |

### Cleavage Reactions in AN

**Ground State for Ammonia:** E = -56.442162. TC = 0.037270.

| Center<br>Number | Atomic<br>Number | Atomic<br>Type | Coordinates (Angstroms) |           |           |
|------------------|------------------|----------------|-------------------------|-----------|-----------|
|                  |                  |                | X                       | Y         | Z         |
| 1                | 7                | 0              | 0.000000                | 0.000000  | 0.114589  |
| 2                | 1                | 0              | 0.000000                | 0.947508  | -0.267375 |
| 3                | 1                | 0              | -0.820566               | -0.473754 | -0.267375 |
| 4                | 1                | 0              | 0.820566                | -0.473754 | -0.267375 |

**Transition State for Azetidine:** E = -229.1973591. TC = 0.143589.

Imaginary Frequency = -801.0123.

| Center<br>Number | Atomic<br>Number | Atomic<br>Type | Coordinates (Angstroms) |           |           |
|------------------|------------------|----------------|-------------------------|-----------|-----------|
|                  |                  |                | X                       | Y         | Z         |
| 1                | 6                | 0              | 0.446131                | -0.534979 | -0.014840 |
| 2                | 7                | 0              | 2.269213                | -0.050164 | 0.084935  |
| 3                | 6                | 0              | -0.150561               | 0.841915  | -0.248695 |
| 4                | 6                | 0              | -1.554042               | 0.547823  | 0.242283  |
| 5                | 1                | 0              | 2.852733                | -0.890163 | 0.177278  |
| 6                | 1                | 0              | 2.463458                | 0.555811  | 0.890936  |
| 7                | 1                | 0              | 2.571707                | 0.447082  | -0.761394 |

Supplementary Material (ESI) for Organic & Biomolecular Chemistry  
 This journal is (c) The Royal Society of Chemistry 2009

|    |   |   |           |           |           |
|----|---|---|-----------|-----------|-----------|
| 8  | 1 | 0 | -0.147431 | 1.059823  | -1.323034 |
| 9  | 7 | 0 | -1.641683 | -0.842982 | -0.224458 |
| 10 | 1 | 0 | -2.137873 | -1.410237 | 0.480450  |
| 11 | 1 | 0 | 0.629188  | -1.230006 | -0.820201 |
| 12 | 1 | 0 | 0.426379  | -0.940755 | 0.989831  |
| 13 | 1 | 0 | 0.385166  | 1.648385  | 0.268937  |
| 14 | 1 | 0 | -1.566085 | 0.637550  | 1.343636  |
| 15 | 1 | 0 | -2.319122 | 1.245979  | -0.142263 |

**Ground State for Azetidine:** E = -172.8380306. TC = 0.105193.

| Center<br>Number | Atomic<br>Number | Atomic<br>Type | Coordinates (Angstroms) |           |           |
|------------------|------------------|----------------|-------------------------|-----------|-----------|
|                  |                  |                | X                       | Y         | Z         |
| 1                | 6                | 0              | -1.044067               | -0.034325 | 0.112487  |
| 2                | 1                | 0              | -1.346311               | -0.110033 | 1.166797  |
| 3                | 6                | 0              | 0.000639                | 1.076417  | -0.094316 |
| 4                | 6                | 0              | 1.044031                | -0.035550 | 0.112471  |
| 5                | 7                | 0              | -0.000606               | -1.030454 | -0.266292 |
| 6                | 1                | 0              | -0.001150               | -1.884895 | 0.309043  |
| 7                | 1                | 0              | 0.001128                | 1.916173  | 0.604534  |
| 8                | 1                | 0              | 0.000862                | 1.448200  | -1.122574 |
| 9                | 1                | 0              | 1.346026                | -0.111539 | 1.166846  |
| 10               | 1                | 0              | -1.935864               | -0.040850 | -0.522307 |
| 11               | 1                | 0              | 1.935935                | -0.043128 | -0.522151 |

**Transition State for 2-Fluoroazetidine:** E = -328.3408516. TC = 0.134899  
 Imaginary Frequency = -736.5861.

| Center<br>Number | Atomic<br>Number | Atomic<br>Type | Coordinates (Angstroms) |           |           |
|------------------|------------------|----------------|-------------------------|-----------|-----------|
|                  |                  |                | X                       | Y         | Z         |
| 1                | 1                | 0              | -1.639122               | 1.021201  | 0.918259  |
| 2                | 6                | 0              | -1.286366               | 0.581799  | -0.004664 |
| 3                | 1                | 0              | -1.633926               | 1.016392  | -0.931851 |
| 4                | 7                | 0              | -3.032037               | -0.564876 | 0.000861  |
| 5                | 6                | 0              | -0.368036               | -0.641337 | -0.000674 |
| 6                | 6                | 0              | 0.887738                | 0.160198  | 0.004785  |
| 7                | 1                | 0              | -3.837253               | 0.051412  | -0.153746 |
| 8                | 1                | 0              | -3.185651               | -1.039640 | 0.896967  |
| 9                | 1                | 0              | -3.059553               | -1.282157 | -0.731561 |
| 10               | 1                | 0              | -0.499206               | -1.270294 | 0.886677  |
| 11               | 1                | 0              | -0.488833               | -1.266412 | -0.892278 |
| 12               | 7                | 0              | 0.426071                | 1.364835  | 0.001120  |
| 13               | 9                | 0              | 3.798918                | -0.608749 | -0.001342 |
| 14               | 1                | 0              | 1.942140                | -0.150995 | 0.007362  |
| 15               | 1                | 0              | 1.052893                | 2.195559  | 0.001706  |

**Ground State for 2-Fluoroazetidine:** E = -271.9534255. TC = 0.097599.

| Center<br>Number | Atomic<br>Number | Atomic<br>Type | Coordinates (Angstroms) |           |           |
|------------------|------------------|----------------|-------------------------|-----------|-----------|
|                  |                  |                | X                       | Y         | Z         |
| 1                | 6                | 0              | -1.497784               | -0.052846 | -0.116112 |
| 2                | 6                | 0              | 0.507584                | -0.029382 | 0.407645  |
| 3                | 6                | 0              | -0.454819               | 1.078672  | 0.002519  |
| 4                | 1                | 0              | -2.133450               | -0.073272 | -1.005133 |
| 5                | 1                | 0              | -2.117721               | -0.141484 | 0.783007  |
| 6                | 7                | 0              | -0.366699               | -1.027187 | -0.152077 |
| 7                | 1                | 0              | -0.475561               | -1.891624 | 0.398095  |

Supplementary Material (ESI) for Organic & Biomolecular Chemistry  
 This journal is (c) The Royal Society of Chemistry 2009

|    |   |   |           |           |           |
|----|---|---|-----------|-----------|-----------|
| 8  | 9 | 0 | 1.782350  | 0.007331  | -0.234721 |
| 9  | 1 | 0 | -0.636009 | 1.874163  | 0.727569  |
| 10 | 1 | 0 | -0.179254 | 1.500723  | -0.967078 |
| 11 | 1 | 0 | 0.737849  | -0.122836 | 1.476255  |

**Transition State for 3-Fluoroazetidone:** E = -328.3045325.

TC = 0.136146. Imaginary Frequency = -765.0728.

| Center<br>Number | Atomic<br>Number | Atomic<br>Type | Coordinates (Angstroms) |           |           |
|------------------|------------------|----------------|-------------------------|-----------|-----------|
|                  |                  |                | X                       | Y         | Z         |
| 1                | 1                | 0              | 0.370705                | -1.688977 | 0.725975  |
| 2                | 6                | 0              | 0.262324                | -0.898186 | -0.003078 |
| 3                | 1                | 0              | 0.176557                | -1.186940 | -1.044759 |
| 4                | 7                | 0              | 2.098999                | -0.594623 | -0.075020 |
| 5                | 6                | 0              | -0.218953               | 0.482036  | 0.388682  |
| 6                | 6                | 0              | -1.585691               | 0.466811  | -0.219694 |
| 7                | 1                | 0              | 2.574827                | -1.485547 | -0.264144 |
| 8                | 1                | 0              | 2.459219                | -0.226838 | 0.814280  |
| 9                | 1                | 0              | 2.350809                | 0.070572  | -0.813860 |
| 10               | 1                | 0              | -0.239354               | 0.593131  | 1.478233  |
| 11               | 9                | 0              | 0.642055                | 1.542640  | -0.082155 |
| 12               | 7                | 0              | -1.844847               | -0.931408 | 0.163434  |
| 13               | 1                | 0              | -1.488844               | 0.633108  | -1.305166 |
| 14               | 1                | 0              | -2.277245               | 1.221769  | 0.182686  |
| 15               | 1                | 0              | -2.230319               | -1.435783 | -0.648202 |

**Ground State for 3-Fluoroazetidone:** E = -271.9405895. TC = 0.097682.

| Center<br>Number | Atomic<br>Number | Atomic<br>Type | Coordinates (Angstroms) |           |           |
|------------------|------------------|----------------|-------------------------|-----------|-----------|
|                  |                  |                | X                       | Y         | Z         |
| 1                | 6                | 0              | -0.460693               | -1.050230 | -0.059829 |
| 2                | 6                | 0              | -0.460755               | 1.050270  | -0.059874 |
| 3                | 6                | 0              | 0.533115                | -0.000014 | 0.425137  |
| 4                | 1                | 0              | -0.620861               | -1.945105 | 0.547870  |
| 5                | 1                | 0              | -0.235245               | -1.328949 | -1.098570 |
| 6                | 1                | 0              | -0.620779               | 1.944976  | 0.548125  |
| 7                | 1                | 0              | -0.235252               | 1.329260  | -1.098502 |
| 8                | 1                | 0              | 0.721184                | -0.000086 | 1.502562  |
| 9                | 7                | 0              | -1.515537               | 0.000025  | 0.062267  |
| 10               | 1                | 0              | -2.196803               | -0.000372 | -0.710484 |
| 11               | 9                | 0              | 1.791834                | -0.000006 | -0.217720 |

**Transition State for 2,2-Difluoroazetidone:** E = -427.4504763.

TC = 0.127618. Imaginary Frequency = -775.9199.

| Center<br>Number | Atomic<br>Number | Atomic<br>Type | Coordinates (Angstroms) |           |           |
|------------------|------------------|----------------|-------------------------|-----------|-----------|
|                  |                  |                | X                       | Y         | Z         |
| 1                | 1                | 0              | -1.237843               | 0.935150  | 0.976634  |
| 2                | 6                | 0              | -1.147302               | 0.611754  | -0.051323 |
| 3                | 1                | 0              | -1.526634               | 1.256401  | -0.827781 |
| 4                | 7                | 0              | -2.947122               | -0.283754 | 0.057063  |
| 5                | 6                | 0              | -0.344534               | -0.632940 | -0.367610 |
| 6                | 6                | 0              | 0.974707                | 0.019938  | -0.064316 |
| 7                | 1                | 0              | -3.677156               | 0.420534  | 0.211751  |
| 8                | 1                | 0              | -3.000881               | -0.957693 | 0.828911  |
| 9                | 1                | 0              | -3.181875               | -0.783631 | -0.807892 |
| 10               | 1                | 0              | -0.573575               | -1.491867 | 0.266964  |

Supplementary Material (ESI) for Organic & Biomolecular Chemistry  
 This journal is (c) The Royal Society of Chemistry 2009

|    |   |   |           |           |           |
|----|---|---|-----------|-----------|-----------|
| 11 | 1 | 0 | -0.428957 | -0.913624 | -1.420770 |
| 12 | 7 | 0 | 0.728870  | 1.325750  | -0.320426 |
| 13 | 1 | 0 | 1.307879  | 1.965441  | 0.247667  |
| 14 | 9 | 0 | 2.107574  | -0.589911 | -0.726680 |
| 15 | 9 | 0 | 1.331269  | -0.267555 | 1.311964  |

**Ground State for 2,2-Difluoroazetidone:** E = -371.0683663. TC = 0.089492.

| Center Number | Atomic Number | Atomic Type | Coordinates (Angstroms) |           |           |
|---------------|---------------|-------------|-------------------------|-----------|-----------|
|               |               |             | X                       | Y         | Z         |
| 1             | 6             | 0           | 0.684724                | -0.674841 | 0.860391  |
| 2             | 6             | 0           | -0.380647               | -0.043538 | -0.013732 |
| 3             | 6             | 0           | 1.671314                | 0.075294  | -0.067161 |
| 4             | 1             | 0           | 0.657356                | -0.390874 | 1.913293  |
| 5             | 1             | 0           | 0.719082                | -1.760339 | 0.746255  |
| 6             | 1             | 0           | 2.036444                | 1.009996  | 0.369814  |
| 7             | 1             | 0           | 2.499969                | -0.501745 | -0.482094 |
| 8             | 9             | 0           | -0.979928               | 1.076599  | 0.583255  |
| 9             | 7             | 0           | 0.544987                | 0.267761  | -1.029717 |
| 10            | 1             | 0           | 0.433292                | 1.171199  | -1.517390 |
| 11            | 9             | 0           | -1.466005               | -0.803716 | -0.416461 |

**Transition State for 3,3-Difluoroazetidone:** E = -427.4178991.  
 TC = 0.128476. Imaginary Frequency = -772.9668.

| Center Number | Atomic Number | Atomic Type | Coordinates (Angstroms) |           |           |
|---------------|---------------|-------------|-------------------------|-----------|-----------|
|               |               |             | X                       | Y         | Z         |
| 1             | 1             | 0           | 0.338722                | 1.560208  | -0.950537 |
| 2             | 6             | 0           | 0.339007                | 1.013232  | -0.017441 |
| 3             | 1             | 0           | 0.409310                | 1.571382  | 0.906472  |
| 4             | 7             | 0           | 2.158676                | 0.626723  | -0.029539 |
| 5             | 6             | 0           | -0.206843               | -0.398077 | -0.026861 |
| 6             | 6             | 0           | -1.589474               | -0.200654 | -0.545965 |
| 7             | 1             | 0           | 2.668376                | 1.513962  | 0.073072  |
| 8             | 1             | 0           | 2.463844                | 0.182461  | -0.903599 |
| 9             | 1             | 0           | 2.436098                | 0.015354  | 0.749519  |
| 10            | 7             | 0           | -1.764023               | 1.170623  | -0.046002 |
| 11            | 1             | 0           | -2.025682               | 1.094493  | 0.949807  |
| 12            | 1             | 0           | -1.566756               | -0.215153 | -1.642890 |
| 13            | 1             | 0           | -2.292201               | -0.971462 | -0.199271 |
| 14            | 9             | 0           | -0.207196               | -0.878453 | 1.282783  |
| 15            | 9             | 0           | 0.601593                | -1.323734 | -0.717469 |

**Ground State for 3,3-Difluoroazetidone:** E = -371.0496966.  
 TC = 0.089777.

| Center Number | Atomic Number | Atomic Type | Coordinates (Angstroms) |           |           |
|---------------|---------------|-------------|-------------------------|-----------|-----------|
|               |               |             | X                       | Y         | Z         |
| 1             | 6             | 0           | -0.414238               | -0.023261 | 0.000043  |
| 2             | 6             | 0           | 0.661558                | -0.149466 | 1.064306  |
| 3             | 6             | 0           | 0.661514                | -0.152519 | -1.063882 |
| 4             | 1             | 0           | 0.726642                | -1.187506 | -1.421866 |
| 5             | 1             | 0           | 0.613889                | 0.546912  | -1.902519 |
| 6             | 7             | 0           | 1.654434                | 0.195807  | -0.000301 |
| 7             | 1             | 0           | 2.481065                | -0.419901 | 0.000537  |
| 8             | 9             | 0           | -1.426120               | -0.957500 | 0.001340  |

Supplementary Material (ESI) for Organic & Biomolecular Chemistry  
 This journal is (c) The Royal Society of Chemistry 2009

|    |   |   |           |           |           |
|----|---|---|-----------|-----------|-----------|
| 9  | 1 | 0 | 0.726640  | -1.183386 | 1.425370  |
| 10 | 1 | 0 | 0.614021  | 0.552477  | 1.900846  |
| 11 | 9 | 0 | -1.040135 | 1.209970  | -0.001680 |

**Transition State for 2-Chloroazetidone:** E = -688.3713099.

TC = 0.134867. Imaginary Frequency = -719.0856.

| Center Number | Atomic Number | Atomic Type | Coordinates (Angstroms) |           |           |
|---------------|---------------|-------------|-------------------------|-----------|-----------|
|               |               |             | X                       | Y         | Z         |
| 1             | 1             | 0           | -0.760844               | 0.703402  | -1.327754 |
| 2             | 6             | 0           | -1.199944               | 0.778140  | -0.342136 |
| 3             | 1             | 0           | -1.768160               | 1.669308  | -0.112889 |
| 4             | 7             | 0           | 0.544158                | 1.861900  | 0.179492  |
| 5             | 6             | 0           | -0.918741               | -0.282960 | 0.724288  |
| 6             | 6             | 0           | -2.112238               | -1.089205 | 0.357190  |
| 7             | 1             | 0           | 0.698594                | 2.636350  | -0.473660 |
| 8             | 1             | 0           | 1.340633                | 1.220249  | 0.104008  |
| 9             | 1             | 0           | 0.542966                | 2.258540  | 1.124426  |
| 10            | 1             | 0           | 0.040634                | -0.786326 | 0.572240  |
| 11            | 1             | 0           | -0.951316               | 0.116987  | 1.743765  |
| 12            | 7             | 0           | -2.615970               | -0.393671 | -0.601559 |
| 13            | 1             | 0           | -3.481071               | -0.668258 | -1.112622 |
| 14            | 17            | 0           | 2.748406                | -0.696166 | -0.162629 |
| 15            | 1             | 0           | -2.496114               | -2.028880 | 0.765604  |

**Ground State for 2-Chlororoazetidone:** E = -631.9589100. TC = 0.096423.

| Center Number | Atomic Number | Atomic Type | Coordinates (Angstroms) |           |           |
|---------------|---------------|-------------|-------------------------|-----------|-----------|
|               |               |             | X                       | Y         | Z         |
| 1             | 6             | 0           | 1.545499                | -0.108666 | -0.647653 |
| 2             | 6             | 0           | -0.014237               | 0.021072  | 0.729571  |
| 3             | 6             | 0           | 0.940523                | 1.069210  | 0.146882  |
| 4             | 1             | 0           | 2.634852                | -0.190281 | -0.690269 |
| 5             | 1             | 0           | 1.125013                | -0.197393 | -1.656881 |
| 6             | 7             | 0           | 0.906896                | -1.008929 | 0.345591  |
| 7             | 1             | 0           | 0.535096                | -1.921031 | 0.040835  |
| 8             | 1             | 0           | 0.497629                | 1.896866  | -0.408838 |
| 9             | 1             | 0           | 1.623625                | 1.448046  | 0.912422  |
| 10            | 17            | 0           | -1.603251               | 0.005424  | -0.221265 |
| 11            | 1             | 0           | -0.339937               | 0.044387  | 1.772291  |

**Transition State for 3-Chloroazetidone:** E = -688.3158740

TC = 0.135266. Imaginary Frequency = -757.7273.

| Center Number | Atomic Number | Atomic Type | Coordinates (Angstroms) |           |           |
|---------------|---------------|-------------|-------------------------|-----------|-----------|
|               |               |             | X                       | Y         | Z         |
| 1             | 1             | 0           | 0.540734                | 1.938467  | 0.706313  |
| 2             | 6             | 0           | 0.320298                | 1.161051  | -0.011427 |
| 3             | 1             | 0           | 0.499877                | 1.378612  | -1.058401 |
| 4             | 7             | 0           | -1.476042               | 1.652828  | -0.069309 |
| 5             | 6             | 0           | 0.277203                | -0.295545 | 0.414637  |
| 6             | 6             | 0           | 1.552680                | -0.788956 | -0.204240 |
| 7             | 1             | 0           | -1.495930               | 2.671711  | -0.204934 |
| 8             | 1             | 0           | -1.970871               | 1.445642  | 0.807337  |
| 9             | 1             | 0           | -2.002396               | 1.221655  | -0.837315 |
| 10            | 1             | 0           | 0.315027                | -0.359442 | 1.506778  |
| 11            | 7             | 0           | 2.304467                | 0.423829  | 0.134218  |



Supplementary Material (ESI) for Organic & Biomolecular Chemistry  
 This journal is (c) The Royal Society of Chemistry 2009

|    |    |   |           |           |           |
|----|----|---|-----------|-----------|-----------|
| 12 | 1  | 0 | 1.402837  | -0.944271 | -1.284738 |
| 13 | 1  | 0 | 1.919314  | -1.732974 | 0.227241  |
| 14 | 1  | 0 | 2.791344  | 0.765144  | -0.708119 |
| 15 | 17 | 0 | -1.217647 | -1.257673 | -0.047197 |

**Ground State for 3-Chlororoazetidone:** E = -631.9505733. TC = 0.096661.

| Center Number | Atomic Number | Atomic Type | Coordinates (Angstroms) |           |           |
|---------------|---------------|-------------|-------------------------|-----------|-----------|
|               |               |             | X                       | Y         | Z         |
| 1             | 6             | 0           | -0.074299               | 0.000019  | 0.689623  |
| 2             | 6             | 0           | 0.919019                | 1.045967  | 0.167394  |
| 3             | 6             | 0           | 0.919083                | -1.045953 | 0.167406  |
| 4             | 1             | 0           | 1.581921                | -1.375171 | 0.980330  |
| 5             | 1             | 0           | 0.516638                | -1.916892 | -0.358286 |
| 6             | 7             | 0           | 1.517350                | -0.000004 | -0.707158 |
| 7             | 1             | 0           | 2.547482                | -0.000070 | -0.721968 |
| 8             | 1             | 0           | 1.581913                | 1.375250  | 0.980266  |
| 9             | 1             | 0           | -0.320558               | 0.000076  | 1.753460  |
| 10            | 1             | 0           | 0.516673                | 1.916883  | -0.358426 |
| 11            | 17            | 0           | -1.625197               | -0.000014 | -0.204224 |

**Transition State for 2,2-Dichloroazetidone:** E = -1147.3624824.

TC = 0.126493. Imaginary Frequency = -690.1495.

| Center Number | Atomic Number | Atomic Type | Coordinates (Angstroms) |           |           |
|---------------|---------------|-------------|-------------------------|-----------|-----------|
|               |               |             | X                       | Y         | Z         |
| 1             | 1             | 0           | -0.019942               | -0.007299 | -0.008791 |
| 2             | 6             | 0           | -0.007605               | 0.001426  | 1.072682  |
| 3             | 1             | 0           | 0.950714                | 0.006444  | 1.573874  |
| 4             | 7             | 0           | 0.209259                | -2.135312 | 0.900170  |
| 5             | 6             | 0           | -1.303670               | -0.158898 | 1.860294  |
| 6             | 6             | 0           | -1.487133               | 1.314100  | 1.941508  |
| 7             | 1             | 0           | 0.980556                | -2.375558 | 0.269604  |
| 8             | 1             | 0           | -0.659469               | -2.488072 | 0.485666  |
| 9             | 1             | 0           | 0.369538                | -2.638391 | 1.778528  |
| 10            | 1             | 0           | -2.081740               | -0.685364 | 1.299891  |
| 11            | 1             | 0           | -1.165091               | -0.635174 | 2.836655  |
| 12            | 7             | 0           | -0.463710               | 1.774405  | 1.321923  |
| 13            | 1             | 0           | -0.253190               | 2.786168  | 1.170175  |
| 14            | 17            | 0           | -2.757133               | 2.169371  | 2.681522  |
| 15            | 17            | 0           | -2.918200               | -2.616426 | -0.364595 |

**Ground State for 2,2-Dichloroazetidone:** E = -1091.0616638. TC =

0.086976.

| Center Number | Atomic Number | Atomic Type | Coordinates (Angstroms) |           |           |
|---------------|---------------|-------------|-------------------------|-----------|-----------|
|               |               |             | X                       | Y         | Z         |
| 1             | 1             | 0           | 0.223989                | 2.382385  | -0.669609 |
| 2             | 6             | 0           | -0.521487               | 1.994496  | 0.027136  |
| 3             | 1             | 0           | -1.033672               | 2.788707  | 0.573457  |
| 4             | 6             | 0           | -0.099012               | 0.753958  | 0.862441  |
| 5             | 6             | 0           | -1.153161               | 0.062793  | 0.064267  |
| 6             | 1             | 0           | 0.912354                | 0.383213  | 0.660137  |
| 7             | 1             | 0           | -0.299241               | 0.804915  | 1.936916  |
| 8             | 7             | 0           | -1.491411               | 1.091081  | -0.650825 |
| 9             | 1             | 0           | -2.188691               | 1.209437  | -1.425493 |
| 10            | 17            | 0           | -1.748608               | -1.492533 | 0.013688  |

Supplementary Material (ESI) for Organic & Biomolecular Chemistry  
 This journal is (c) The Royal Society of Chemistry 2009

11            17            0            3.129025    -0.394156    -0.145612

**Transition State for 2-Bromoazetidide:** E = -2801.5726209.

TC = 0.134905. Imaginary Frequency = -720.6686.

| Center<br>Number | Atomic<br>Number | Atomic<br>Type | Coordinates (Angstroms) |           |           |
|------------------|------------------|----------------|-------------------------|-----------|-----------|
|                  |                  |                | X                       | Y         | Z         |
| 1                | 1                | 0              | -1.520249               | 0.712238  | -1.335655 |
| 2                | 6                | 0              | -1.980709               | 0.739107  | -0.357283 |
| 3                | 1                | 0              | -2.698433               | 1.524573  | -0.162786 |
| 4                | 7                | 0              | -0.451833               | 2.113236  | 0.148242  |
| 5                | 6                | 0              | -1.543989               | -0.232138 | 0.741621  |
| 6                | 6                | 0              | -2.572556               | -1.240923 | 0.380090  |
| 7                | 1                | 0              | -0.406804               | 2.875197  | -0.535904 |
| 8                | 1                | 0              | 0.435978                | 1.602715  | 0.110583  |
| 9                | 1                | 0              | -0.532351               | 2.543042  | 1.075307  |
| 10               | 1                | 0              | -0.509824               | -0.565637 | 0.615713  |
| 11               | 1                | 0              | -1.663924               | 0.182239  | 1.748880  |
| 12               | 7                | 0              | -3.172579               | -0.670155 | -0.605479 |
| 13               | 1                | 0              | -3.965940               | -1.107742 | -1.119159 |
| 14               | 1                | 0              | -2.793707               | -2.222481 | 0.810090  |
| 15               | 35               | 0              | 2.160276                | -0.321200 | -0.074085 |

**Ground State for 2-Bromoazetidide:** E = -2745.1507274. TC = 0.096029.

| Center<br>Number | Atomic<br>Number | Atomic<br>Type | Coordinates (Angstroms) |           |           |
|------------------|------------------|----------------|-------------------------|-----------|-----------|
|                  |                  |                | X                       | Y         | Z         |
| 1                | 6                | 0              | -2.483183               | -0.042710 | -0.190249 |
| 2                | 6                | 0              | -0.546136               | -0.038304 | 0.513722  |
| 3                | 6                | 0              | -1.440283               | 1.080238  | -0.009352 |
| 4                | 1                | 0              | -3.063488               | -0.056432 | -1.116739 |
| 5                | 1                | 0              | -3.153149               | -0.129549 | 0.673506  |
| 6                | 7                | 0              | -1.358510               | -1.027649 | -0.164285 |
| 7                | 1                | 0              | -1.514577               | -1.899115 | 0.366281  |
| 8                | 1                | 0              | -1.664224               | 1.895640  | 0.681660  |
| 9                | 1                | 0              | -1.093791               | 1.473447  | -0.967535 |
| 10               | 1                | 0              | -0.490197               | -0.122365 | 1.606095  |
| 11               | 35               | 0              | 1.351618                | 0.001045  | -0.056514 |

**Transition State for 2,2Dibromoazetidide:** E = --5373.8763711.

TC = 0.125985. Imaginary Frequency = -694.5696.

| Center<br>Number | Atomic<br>Number | Atomic<br>Type | Coordinates (Angstroms) |          |           |
|------------------|------------------|----------------|-------------------------|----------|-----------|
|                  |                  |                | X                       | Y        | Z         |
| 1                | 1                | 0              | -0.575855               | 1.961205 | 1.233174  |
| 2                | 6                | 0              | 0.004287                | 2.039967 | 0.323374  |
| 3                | 1                | 0              | 0.298264                | 3.025370 | -0.012646 |
| 4                | 7                | 0              | -1.889404               | 2.382248 | -0.628873 |
| 5                | 6                | 0              | 0.266109                | 0.807673 | -0.537620 |
| 6                | 6                | 0              | 1.557147                | 0.548920 | 0.152551  |
| 7                | 1                | 0              | -2.405307               | 3.129323 | -0.152952 |
| 8                | 1                | 0              | -2.423904               | 1.514696 | -0.522045 |
| 9                | 1                | 0              | -1.865464               | 2.619622 | -1.625872 |
| 10               | 1                | 0              | -0.485821               | 0.025252 | -0.398941 |
| 11               | 1                | 0              | 0.376876                | 1.033974 | -1.603555 |
| 12               | 7                | 0              | 1.629365                | 1.493880 | 1.015216  |

Supplementary Material (ESI) for Organic & Biomolecular Chemistry  
 This journal is (c) The Royal Society of Chemistry 2009

|    |    |   |           |           |           |
|----|----|---|-----------|-----------|-----------|
| 13 | 1  | 0 | 2.409581  | 1.638508  | 1.694861  |
| 14 | 35 | 0 | -2.918600 | -0.972324 | 0.127392  |
| 15 | 35 | 0 | 2.790790  | -0.812253 | -0.154428 |

**Ground State for 2,2-Dibromoazetidene:** E = -5317.4539551. TC = 0.086616.

| Center<br>Number | Atomic<br>Number | Atomic<br>Type | Coordinates (Angstroms) |           |           |
|------------------|------------------|----------------|-------------------------|-----------|-----------|
|                  |                  |                | X                       | Y         | Z         |
| 1                | 6                | 0              | 0.017836                | 0.510027  | -0.011490 |
| 2                | 6                | 0              | 1.135869                | 2.231482  | -0.083014 |
| 3                | 6                | 0              | 0.397886                | 1.513954  | 1.072285  |
| 4                | 1                | 0              | 1.013757                | 3.314389  | -0.162975 |
| 5                | 7                | 0              | 0.272069                | 1.461603  | -1.019321 |
| 6                | 1                | 0              | 0.619566                | 1.150277  | -1.941615 |
| 7                | 1                | 0              | -0.474643               | 2.077996  | 1.412951  |
| 8                | 1                | 0              | 0.977858                | 1.140417  | 1.916531  |
| 9                | 1                | 0              | 2.195007                | 1.955040  | -0.142853 |
| 10               | 35               | 0              | -1.767034               | -0.276550 | -0.001664 |
| 11               | 35               | 0              | 1.322875                | -1.020653 | 0.006993  |

**Transition State for Oxetane:** E = -249.0767135.

TC = 0.131967. Imaginary Frequency = -767.2942.

| Center<br>Number | Atomic<br>Number | Atomic<br>Type | Coordinates (Angstroms) |           |           |
|------------------|------------------|----------------|-------------------------|-----------|-----------|
|                  |                  |                | X                       | Y         | Z         |
| 1                | 6                | 0              | 0.376157                | -0.531018 | 0.004634  |
| 2                | 7                | 0              | 2.270652                | -0.014571 | 0.060460  |
| 3                | 6                | 0              | -0.193853               | 0.860176  | -0.201745 |
| 4                | 1                | 0              | 0.440490                | -0.934823 | 1.006738  |
| 5                | 1                | 0              | 0.592025                | -1.200067 | -0.815067 |
| 6                | 6                | 0              | -1.609944               | 0.480913  | 0.191232  |
| 7                | 1                | 0              | 2.864535                | -0.849275 | 0.120993  |
| 8                | 1                | 0              | 0.295557                | 1.633065  | 0.402900  |
| 9                | 1                | 0              | 2.547677                | 0.498945  | -0.783713 |
| 10               | 1                | 0              | 2.488885                | 0.578356  | 0.868814  |
| 11               | 1                | 0              | -0.119772               | 1.138251  | -1.258382 |
| 12               | 1                | 0              | -2.405574               | 1.002529  | -0.362881 |
| 13               | 1                | 0              | -1.777896               | 0.663484  | 1.268279  |
| 14               | 8                | 0              | -1.531832               | -0.911112 | -0.104453 |

**Ground State for Oxetane:** E = -192.6855647. TC = 0.092707.

| Center<br>Number | Atomic<br>Number | Atomic<br>Type | Coordinates (Angstroms) |           |           |
|------------------|------------------|----------------|-------------------------|-----------|-----------|
|                  |                  |                | X                       | Y         | Z         |
| 1                | 1                | 0              | -1.828953               | -0.136684 | -0.661022 |
| 2                | 6                | 0              | -1.033056               | -0.052264 | 0.083675  |
| 3                | 1                | 0              | -1.451495               | -0.129955 | 1.093909  |
| 4                | 6                | 0              | 0.000117                | 1.066011  | -0.080367 |
| 5                | 6                | 0              | 1.033048                | -0.052461 | 0.083676  |
| 6                | 1                | 0              | 0.000154                | 1.500426  | -1.082673 |
| 7                | 1                | 0              | 1.828884                | -0.137139 | -0.661063 |
| 8                | 1                | 0              | 1.451494                | -0.130275 | 1.093888  |
| 9                | 8                | 0              | -0.000123               | -1.074123 | -0.121956 |
| 10               | 1                | 0              | 0.000249                | 1.858892  | 0.670705  |

Supplementary Material (ESI) for Organic & Biomolecular Chemistry  
 This journal is (c) The Royal Society of Chemistry 2009

**Transition State for 2-Fluorooxetane:** E = -348.2080445.

TC = 0.124279. Imaginary Frequency = -740.5666.

| Center<br>Number | Atomic<br>Number | Atomic<br>Type | Coordinates (Angstroms) |           |           |
|------------------|------------------|----------------|-------------------------|-----------|-----------|
|                  |                  |                | X                       | Y         | Z         |
| 1                | 1                | 0              | 0.749541                | 0.455089  | -1.277751 |
| 2                | 6                | 0              | 0.758155                | 0.571602  | -0.203084 |
| 3                | 1                | 0              | 1.201352                | 1.470229  | 0.200581  |
| 4                | 7                | 0              | 2.605668                | -0.272507 | -0.171188 |
| 5                | 6                | 0              | 0.110146                | -0.473446 | 0.689466  |
| 6                | 6                | 0              | -1.283716               | 0.040798  | 0.434299  |
| 7                | 1                | 0              | 3.266441                | 0.322560  | -0.682592 |
| 8                | 1                | 0              | 2.623009                | -1.197207 | -0.614477 |
| 9                | 1                | 0              | 2.970327                | -0.382083 | 0.781246  |
| 10               | 1                | 0              | 0.296046                | -1.508236 | 0.390086  |
| 11               | 1                | 0              | 0.412498                | -0.337468 | 1.732870  |
| 12               | 8                | 0              | -1.005359               | 1.244026  | -1.106752 |
| 13               | 1                | 0              | -2.037198               | 0.026843  | 1.232215  |
| 14               | 9                | 0              | -1.909593               | -0.858679 | -0.581549 |

**Ground State for 2-Fluorooxetane:** E = -291.7853099. TC = 0.085126.

| Center<br>Number | Atomic<br>Number | Atomic<br>Type | Coordinates (Angstroms) |           |           |
|------------------|------------------|----------------|-------------------------|-----------|-----------|
|                  |                  |                | X                       | Y         | Z         |
| 1                | 1                | 0              | -0.762671               | -1.845159 | 0.640245  |
| 2                | 6                | 0              | -0.475044               | -1.038163 | -0.037742 |
| 3                | 1                | 0              | -0.223592               | -1.426300 | -1.031664 |
| 4                | 6                | 0              | 0.525090                | -0.000033 | 0.447929  |
| 5                | 6                | 0              | -0.474924               | 1.038165  | -0.037729 |
| 6                | 1                | 0              | 0.738654                | -0.000017 | 1.520516  |
| 7                | 1                | 0              | -0.762492               | 1.845200  | 0.640227  |
| 8                | 1                | 0              | -0.223494               | 1.426255  | -1.031669 |
| 9                | 8                | 0              | -1.508699               | 0.000055  | -0.114727 |
| 10               | 9                | 0              | 1.761384                | -0.000026 | -0.228288 |

**Transition State for 2,2-Difluorooxetane:** E = -447.3333294.

TC = 0.116312. Imaginary Frequency = -702.3454.

| Center<br>Number | Atomic<br>Number | Atomic<br>Type | Coordinates (Angstroms) |           |           |
|------------------|------------------|----------------|-------------------------|-----------|-----------|
|                  |                  |                | X                       | Y         | Z         |
| 1                | 1                | 0              | 1.382304                | 1.101504  | -0.924890 |
| 2                | 6                | 0              | 1.095832                | 0.622647  | -0.000045 |
| 3                | 1                | 0              | 1.378205                | 1.095457  | 0.929230  |
| 4                | 7                | 0              | 3.003758                | -0.262177 | 0.000559  |
| 5                | 6                | 0              | 0.353738                | -0.696989 | -0.005384 |
| 6                | 6                | 0              | -0.982488               | 0.003879  | -0.000702 |
| 7                | 1                | 0              | 3.720060                | 0.471583  | 0.008522  |
| 8                | 1                | 0              | 3.175727                | -0.840565 | -0.828474 |
| 9                | 1                | 0              | 3.169840                | -0.852725 | 0.822193  |
| 10               | 1                | 0              | 0.532190                | -1.292061 | -0.903797 |
| 11               | 1                | 0              | 0.534778                | -1.302390 | 0.885538  |
| 12               | 9                | 0              | -1.803981               | -0.352461 | 1.099776  |
| 13               | 9                | 0              | -1.813678               | -0.353566 | -1.092825 |
| 14               | 8                | 0              | -0.645371               | 1.278932  | -0.002252 |

Supplementary Material (ESI) for Organic & Biomolecular Chemistry  
 This journal is (c) The Royal Society of Chemistry 2009

**Ground State for 2,2-Difluorooxetane:** E = -390.9082960. TC = 0.076389.

| Center<br>Number | Atomic<br>Number | Atomic<br>Type | Coordinates (Angstroms) |           |           |
|------------------|------------------|----------------|-------------------------|-----------|-----------|
|                  |                  |                | X                       | Y         | Z         |
| 1                | 6                | 0              | -1.722145               | 0.000361  | -0.124154 |
| 2                | 6                | 0              | 0.382951                | -0.000147 | 0.021432  |
| 3                | 6                | 0              | -0.726174               | -0.001954 | 1.074492  |
| 4                | 1                | 0              | -2.309476               | 0.908520  | -0.270837 |
| 5                | 1                | 0              | -2.311369               | -0.906194 | -0.272972 |
| 6                | 1                | 0              | -0.739431               | -0.902532 | 1.695796  |
| 7                | 1                | 0              | -0.739130               | 0.895678  | 1.700009  |
| 8                | 9                | 0              | 1.251961                | 1.121223  | 0.007266  |
| 9                | 9                | 0              | 1.253962                | -1.119856 | 0.005057  |
| 10               | 8                | 0              | -0.507712               | 0.000333  | -1.099191 |

**Transition State for 2-Chlorooxetane:** E = -708.2124939.

TC = 0.123214. Imaginary Frequency = -732.6641.

| Center<br>Number | Atomic<br>Number | Atomic<br>Type | Coordinates (Angstroms) |           |           |
|------------------|------------------|----------------|-------------------------|-----------|-----------|
|                  |                  |                | X                       | Y         | Z         |
| 1                | 1                | 0              | 0.957807                | -0.075564 | -1.313015 |
| 2                | 6                | 0              | 1.156293                | 0.467110  | -0.398606 |
| 3                | 1                | 0              | 1.823582                | 1.315405  | -0.452275 |
| 4                | 7                | 0              | 2.825082                | -0.708023 | -0.137967 |
| 5                | 6                | 0              | 0.490189                | 0.040231  | 0.899134  |
| 6                | 6                | 0              | -0.816028               | 0.680010  | 0.508284  |
| 7                | 1                | 0              | 3.498541                | -0.520137 | -0.888396 |
| 8                | 1                | 0              | 2.610472                | -1.710475 | -0.167217 |
| 9                | 1                | 0              | 3.303496                | -0.523608 | 0.750367  |
| 10               | 1                | 0              | 0.495715                | -1.033532 | 1.094228  |
| 11               | 1                | 0              | 0.936016                | 0.567529  | 1.750509  |
| 12               | 8                | 0              | -0.404253               | 1.488991  | -0.466923 |
| 13               | 1                | 0              | -1.508438               | 1.090307  | 1.250135  |
| 14               | 17               | 0              | -1.978910               | -0.775871 | -0.198591 |

**Ground State for 2-Chlorooxetane:** E = -651.8048500. TC = 0.084170.

| Center<br>Number | Atomic<br>Number | Atomic<br>Type | Coordinates (Angstroms) |           |           |
|------------------|------------------|----------------|-------------------------|-----------|-----------|
|                  |                  |                | X                       | Y         | Z         |
| 1                | 1                | 0              | 0.282068                | 0.000208  | 1.727947  |
| 2                | 6                | 0              | 0.030972                | 0.027268  | 0.664671  |
| 3                | 6                | 0              | -0.945477               | 1.060509  | 0.112879  |
| 4                | 6                | 0              | -1.617753               | -0.142316 | -0.556118 |
| 5                | 1                | 0              | -1.552016               | 1.504340  | 0.906719  |
| 6                | 1                | 0              | -2.680362               | -0.304355 | -0.366710 |
| 7                | 1                | 0              | -1.385786               | -0.274904 | -1.616768 |
| 8                | 8                | 0              | -0.799164               | -1.055136 | 0.265686  |
| 9                | 1                | 0              | -0.535573               | 1.838895  | -0.532254 |
| 10               | 17               | 0              | 1.615208                | 0.000243  | -0.210177 |

Supplementary Material (ESI) for Organic & Biomolecular Chemistry  
This journal is (c) The Royal Society of Chemistry 2009

**Transition State for 2-Bromooxetane:** E = -2821.4124581.

TC = 0.122295. Imaginary Frequency = -494.5211.

| Center<br>Number | Atomic<br>Number | Atomic<br>Type | Coordinates (Angstroms) |           |           |
|------------------|------------------|----------------|-------------------------|-----------|-----------|
|                  |                  |                | X                       | Y         | Z         |
| 1                | 1                | 0              | -2.801088               | 0.934229  | -0.683373 |
| 2                | 6                | 0              | -1.885835               | 0.387778  | -0.494762 |
| 3                | 1                | 0              | -1.516792               | -0.256930 | -1.282566 |
| 4                | 7                | 0              | -3.304381               | -1.335690 | -0.086304 |
| 5                | 6                | 0              | -1.294051               | 0.287910  | 0.905929  |
| 6                | 6                | 0              | -0.326113               | 1.336776  | 0.526659  |
| 7                | 1                | 0              | -3.931208               | -1.455723 | -0.887894 |
| 8                | 1                | 0              | -3.902379               | -1.200721 | 0.734703  |
| 9                | 1                | 0              | -2.821922               | -2.230205 | 0.044147  |
| 10               | 1                | 0              | -1.982397               | 0.631280  | 1.688600  |
| 11               | 1                | 0              | -0.877938               | -0.681678 | 1.177987  |
| 12               | 8                | 0              | -0.718007               | 1.687112  | -0.627461 |
| 13               | 1                | 0              | 0.445143                | 1.885569  | 1.071128  |
| 14               | 35               | 0              | 1.922837                | -0.395648 | -0.053311 |

**Ground State for 2-Bromooxetane:** E = -2764.9964819. TC = 0.083643.

| Center<br>Number | Atomic<br>Number | Atomic<br>Type | Coordinates (Angstroms) |           |           |
|------------------|------------------|----------------|-------------------------|-----------|-----------|
|                  |                  |                | X                       | Y         | Z         |
| 1                | 1                | 0              | -0.367337               | -0.018720 | 1.814951  |
| 2                | 6                | 0              | -0.563321               | 0.017296  | 0.740531  |
| 3                | 6                | 0              | -1.473245               | 1.060877  | 0.111758  |
| 4                | 6                | 0              | -2.067745               | -0.135709 | -0.641726 |
| 5                | 1                | 0              | -2.162334               | 1.480463  | 0.850644  |
| 6                | 1                | 0              | -3.145123               | -0.299438 | -0.582051 |
| 7                | 1                | 0              | -1.705977               | -0.263491 | -1.666079 |
| 8                | 8                | 0              | -1.351868               | -1.054174 | 0.268979  |
| 9                | 1                | 0              | -1.010305               | 1.856008  | -0.473446 |
| 10               | 35               | 0              | 1.252340                | 0.000680  | -0.095978 |

**Transition State for 2-Aminooxetane:** E = -304.3355358. TC = 0.149142.

Imaginary Frequency = -688.8103.

| Center<br>Number | Atomic<br>Number | Atomic<br>Type | Coordinates (Angstroms) |           |           |
|------------------|------------------|----------------|-------------------------|-----------|-----------|
|                  |                  |                | X                       | Y         | Z         |
| 1                | 1                | 0              | -1.199883               | 1.081115  | 0.880088  |
| 2                | 6                | 0              | -0.987111               | 0.553019  | -0.042282 |
| 3                | 1                | 0              | -1.220901               | 1.057746  | -0.969921 |
| 4                | 7                | 0              | -2.773519               | -0.308125 | -0.031143 |
| 5                | 6                | 0              | -0.114677               | -0.704664 | -0.004100 |
| 6                | 6                | 0              | 1.209989                | -0.004262 | 0.395693  |
| 7                | 1                | 0              | -3.481981               | 0.433094  | -0.061936 |
| 8                | 1                | 0              | -2.881303               | -0.862776 | 0.824298  |
| 9                | 1                | 0              | -2.860738               | -0.911973 | -0.855357 |
| 10               | 1                | 0              | -0.480425               | -1.482707 | 0.682992  |
| 11               | 1                | 0              | -0.034380               | -1.139217 | -1.012454 |
| 12               | 1                | 0              | 1.330208                | -0.043836 | 1.500479  |
| 13               | 7                | 0              | 2.473207                | -0.520332 | -0.167639 |
| 14               | 1                | 0              | 2.735643                | -1.436582 | 0.210968  |
| 15               | 1                | 0              | 2.426075                | -0.553474 | -1.191092 |
| 16               | 8                | 0              | 0.890083                | 1.324156  | -0.089057 |

Supplementary Material (ESI) for Organic & Biomolecular Chemistry  
 This journal is (c) The Royal Society of Chemistry 2009

**Ground State for 2-Aminooxetane:** E = -247.9457171. TC = 0.110401.

| Center<br>Number | Atomic<br>Number | Atomic<br>Type | Coordinates (Angstroms) |           |           |
|------------------|------------------|----------------|-------------------------|-----------|-----------|
|                  |                  |                | X                       | Y         | Z         |
| 1                | 6                | 0              | -1.355405               | -0.099112 | -0.401548 |
| 2                | 6                | 0              | 0.514648                | -0.006164 | 0.497355  |
| 3                | 6                | 0              | -0.526161               | 1.061666  | 0.154405  |
| 4                | 1                | 0              | -1.358625               | -0.179603 | -1.493082 |
| 5                | 1                | 0              | -2.368506               | -0.226662 | -0.010959 |
| 6                | 1                | 0              | 0.813369                | -0.096725 | 1.551028  |
| 7                | 1                | 0              | -0.202033               | 1.822135  | -0.560567 |
| 8                | 1                | 0              | -0.967612               | 1.535515  | 1.034214  |
| 9                | 8                | 0              | -0.437233               | -1.076981 | 0.192191  |
| 10               | 7                | 0              | 1.624456                | -0.024154 | -0.427976 |
| 11               | 1                | 0              | 2.081058                | 0.895487  | -0.440385 |
| 12               | 1                | 0              | 2.330532                | -0.703556 | -0.123212 |

**Transition State for Thietane:** E = -571.7926361.

TC = 0.130379. Imaginary Frequency = -742.7596.

| Center<br>Number | Atomic<br>Number | Atomic<br>Type | Coordinates (Angstroms) |           |           |
|------------------|------------------|----------------|-------------------------|-----------|-----------|
|                  |                  |                | X                       | Y         | Z         |
| 1                | 1                | 0              | 0.688699                | -0.814006 | 1.072040  |
| 2                | 6                | 0              | 0.650846                | -0.504517 | 0.036003  |
| 3                | 1                | 0              | 0.817716                | -1.260574 | -0.715265 |
| 4                | 7                | 0              | 2.672577                | -0.226352 | 0.069982  |
| 5                | 6                | 0              | 0.297926                | 0.933786  | -0.302028 |
| 6                | 6                | 0              | -1.115303               | 1.062607  | 0.239046  |
| 7                | 1                | 0              | 3.138779                | -1.129752 | 0.206971  |
| 8                | 1                | 0              | 2.971655                | 0.396161  | 0.828428  |
| 9                | 1                | 0              | 3.016319                | 0.168197  | -0.812375 |
| 10               | 1                | 0              | 1.007392                | 1.652519  | 0.126985  |
| 11               | 1                | 0              | 0.303932                | 1.051608  | -1.391157 |
| 12               | 16               | 0              | -1.676737               | -0.658521 | -0.042894 |
| 13               | 1                | 0              | -1.724697               | 1.816545  | -0.268033 |
| 14               | 1                | 0              | -1.100852               | 1.288852  | 1.310707  |

**Ground State for Thietane:** E = -515.3973209. TC = 0.090413

| Center<br>Number | Atomic<br>Number | Atomic<br>Type | Coordinates (Angstroms) |           |           |
|------------------|------------------|----------------|-------------------------|-----------|-----------|
|                  |                  |                | X                       | Y         | Z         |
| 1                | 6                | 0              | -0.344897               | 1.134793  | 0.153050  |
| 2                | 6                | 0              | -1.323328               | -0.000001 | -0.187738 |
| 3                | 6                | 0              | -0.344880               | -1.134799 | 0.153061  |
| 4                | 1                | 0              | -0.343648               | 2.005130  | -0.506974 |
| 5                | 1                | 0              | -0.419410               | 1.458961  | 1.194921  |
| 6                | 1                | 0              | -1.546510               | 0.000018  | -1.258986 |
| 7                | 1                | 0              | -2.264397               | -0.000022 | 0.372887  |
| 8                | 1                | 0              | -0.343575               | -2.005017 | -0.507131 |
| 9                | 1                | 0              | -0.419444               | -1.459147 | 1.194862  |
| 10               | 16               | 0              | 1.088475                | 0.000007  | -0.074989 |

**Transition State for 2-Fluorothietane:** E = -670.9002695.

TC = 0.122622. Imaginary Frequency = -718.7473. [2FthietTS-acn]

| Center<br>Number | Atomic<br>Number | Atomic<br>Type | Coordinates (Angstroms) |   |   |
|------------------|------------------|----------------|-------------------------|---|---|
|                  |                  |                | X                       | Y | Z |

Supplementary Material (ESI) for Organic & Biomolecular Chemistry  
 This journal is (c) The Royal Society of Chemistry 2009

```

-----
  1      1      0      -1.264885      1.002981      0.950707
  2      6      0      -1.060532      0.548940     -0.008879
  3      1      0      -1.332274      1.100342     -0.894778
  4      7      0      -2.989643     -0.196685     -0.013132
  5      6      0      -0.384414     -0.806537     -0.074768
  6      6      0      1.005905     -0.477042      0.415916
  7      1      0      -3.650720      0.585211     -0.074497
  8      1      0      -3.212511     -0.724646      0.837651
  9      1      0      -3.163849     -0.810774     -0.816290
 10     1      0      -0.894567     -1.571948      0.520083
 11     16     0      1.152684      1.245555     -0.057232
 12     1      0      1.150231     -0.640344      1.488735
 13     1      0      -0.328235     -1.141559     -1.115796
 14     9      0      1.979511     -1.327057     -0.209089
  
```

**Ground State for 2-Fluorothietane:** E = -614.5007763. TC = 0.082793.

```

  1      1      0      1.207232     -0.307997      1.455084
  2      6      0      0.744779     -0.056260      0.497294
  3      6      0      0.077473      1.301471      0.311327
  4      6      0     -1.157184      0.772178     -0.440826
  5      1      0     -0.194098      1.727890      1.282041
  6      1      0     -2.122681      1.126748     -0.075557
  7      1      0     -1.101048      0.890857     -1.524773
  8      1      0      0.699340      2.018635     -0.233754
  9      9      0      1.757475     -0.255998     -0.483908
 10     16     0     -0.768527     -0.953531      0.077835
  
```

**Transition State for 2,2-Difluorothietane:** E = -770.0141041.

TC = 0.114514. Imaginary Frequency = -703.0132.

```

Center   Atomic   Atomic   Coordinates (Angstroms)
Number   Number   Type      X           Y           Z
-----
  1      1      0     -1.415572      0.832797      1.072588
  2      6      0     -1.244169      0.585323      0.034700
  3      1      0     -1.608701      1.264136     -0.720515
  4      7      0     -3.137312     -0.283506      0.005423
  5      6      0     -0.530799     -0.700351     -0.334755
  6      6      0      0.899974     -0.343070     -0.020532
  7      1      0     -3.831826      0.450703      0.181055
  8      1      0     -3.260268     -1.002350      0.726959
  9      1      0     -3.363527     -0.708870     -0.900532
 10     1      0     -0.876532     -1.568406      0.235200
 11     1      0     -0.638157     -0.902266     -1.404873
 12     9      0      1.811821     -0.924543     -0.906313
 13     9      0      1.277522     -0.895828      1.217904
 14     16     0      0.900103      1.421921     -0.006790
  
```

**Ground State for 2,2-Difluorothietane:** E = -713.6180599. TC = 0.0751111.

```

Center   Atomic   Atomic   Coordinates (Angstroms)
Number   Number   Type      X           Y           Z
-----
  1      6      0      1.598437      0.658007      0.010628
  2      6      0     -0.581268      0.066928     -0.003980
  3      6      0      0.223044      1.352761     -0.064229
  
```



Supplementary Material (ESI) for Organic & Biomolecular Chemistry  
 This journal is (c) The Royal Society of Chemistry 2009

|    |    |   |           |           |           |
|----|----|---|-----------|-----------|-----------|
| 4  | 1  | 0 | 2.147068  | 0.852999  | 0.932809  |
| 5  | 1  | 0 | 2.238336  | 0.828546  | -0.855853 |
| 6  | 1  | 0 | 0.051592  | 1.882937  | -1.005154 |
| 7  | 1  | 0 | 0.003225  | 2.015278  | 0.777701  |
| 8  | 9  | 0 | -1.383699 | -0.049901 | 1.115815  |
| 9  | 9  | 0 | -1.447173 | -0.128410 | -1.061321 |
| 10 | 16 | 0 | 0.849772  | -1.027571 | 0.000346  |

**Transition State for 2-Chlorothietane:** E = -1030.9103379.

TC = 0.121787. Imaginary Frequency = -714.4890.

| Center Number | Atomic Number | Atomic Type | Coordinates (Angstroms) |           |           |
|---------------|---------------|-------------|-------------------------|-----------|-----------|
|               |               |             | X                       | Y         | Z         |
| 1             | 1             | 0           | -1.804856               | 0.830551  | 0.956522  |
| 2             | 6             | 0           | -1.517339               | 0.451089  | -0.014667 |
| 3             | 1             | 0           | -1.919590               | 0.941316  | -0.887163 |
| 4             | 7             | 0           | -3.217858               | -0.718305 | -0.011905 |
| 5             | 6             | 0           | -0.543606               | -0.706883 | -0.113131 |
| 6             | 6             | 0           | 0.708070                | -0.076658 | 0.458998  |
| 7             | 1             | 0           | -4.043819               | -0.112027 | -0.062331 |
| 8             | 1             | 0           | -3.302025               | -1.286781 | 0.837891  |
| 9             | 1             | 0           | -3.252306               | -1.352942 | -0.817213 |
| 10            | 1             | 0           | -0.871455               | -1.600581 | 0.430191  |
| 11            | 16            | 0           | 0.483082                | 1.629782  | -0.072989 |
| 12            | 1             | 0           | 0.737622                | -0.155142 | 1.550271  |
| 13            | 1             | 0           | -0.393508               | -0.964229 | -1.166770 |
| 14            | 17            | 0           | 2.221346                | -0.903166 | -0.092790 |

**Ground State for 2-Fluorothietane:** E = -974.5100941. TC = 0.081997.

| Center Number | Atomic Number | Atomic Type | Coordinates (Angstroms) |           |           |
|---------------|---------------|-------------|-------------------------|-----------|-----------|
|               |               |             | X                       | Y         | Z         |
| 1             | 6             | 0           | -1.848204               | 0.556989  | -0.088904 |
| 2             | 6             | 0           | 0.286400                | 0.167586  | 0.499415  |
| 3             | 6             | 0           | -0.515981               | 1.324953  | -0.091672 |
| 4             | 1             | 0           | -2.485932               | 0.689913  | -0.964927 |
| 5             | 1             | 0           | -2.426526               | 0.708019  | 0.825440  |
| 6             | 1             | 0           | -0.485910               | 2.254974  | 0.485521  |
| 7             | 1             | 0           | -0.192851               | 1.520031  | -1.118456 |
| 8             | 1             | 0           | 0.364937                | 0.196302  | 1.590304  |
| 9             | 17            | 0           | 1.944458                | -0.044999 | -0.115555 |
| 10            | 16            | 0           | -0.960175               | -1.056339 | -0.047905 |

**Transition State for 2-Bromothietane:** E = -3144.1044209.

TC = 0.121271. Imaginary Frequency = -724.3685.

| Center Number | Atomic Number | Atomic Type | Coordinates (Angstroms) |           |           |
|---------------|---------------|-------------|-------------------------|-----------|-----------|
|               |               |             | X                       | Y         | Z         |
| 1             | 1             | 0           | -2.643796               | 0.876347  | -0.346261 |
| 2             | 6             | 0           | -1.770318               | 0.242092  | -0.332475 |
| 3             | 1             | 0           | -1.411294               | -0.140158 | -1.278628 |
| 4             | 7             | 0           | -3.052772               | -1.359496 | -0.230332 |
| 5             | 6             | 0           | -1.034009               | -0.104020 | 0.951584  |
| 6             | 6             | 0           | 0.285446                | 0.613063  | 0.767397  |
| 7             | 1             | 0           | -3.757059               | -1.270067 | -0.970896 |
| 8             | 1             | 0           | -3.552481               | -1.409128 | 0.664493  |

Supplementary Material (ESI) for Organic & Biomolecular Chemistry  
 This journal is (c) The Royal Society of Chemistry 2009

|    |    |   |           |           |           |
|----|----|---|-----------|-----------|-----------|
| 9  | 1  | 0 | -2.570036 | -2.254279 | -0.368637 |
| 10 | 1  | 0 | -1.560399 | 0.352496  | 1.798975  |
| 11 | 1  | 0 | -0.952353 | -1.180218 | 1.134350  |
| 12 | 1  | 0 | 0.819162  | 0.891699  | 1.679020  |
| 13 | 35 | 0 | 1.597168  | -0.635074 | -0.131529 |
| 14 | 16 | 0 | -0.236871 | 1.960661  | -0.275976 |

**Ground State for 2-Bromothietane:** E = -3087.7030034. TC = 0.081379.

| Center<br>Number | Atomic<br>Number | Atomic<br>Type | Coordinates (Angstroms) |           |           |
|------------------|------------------|----------------|-------------------------|-----------|-----------|
|                  |                  |                | X                       | Y         | Z         |
| 1                | 1                | 0              | -0.087956               | -0.100733 | 1.841028  |
| 2                | 6                | 0              | -0.301291               | 0.067453  | 0.783028  |
| 3                | 6                | 0              | -1.068941               | 1.326096  | 0.372678  |
| 4                | 6                | 0              | -1.896230               | 0.631527  | -0.719929 |
| 5                | 1                | 0              | -1.710149               | 1.633565  | 1.206403  |
| 6                | 1                | 0              | -2.956237               | 0.889197  | -0.767568 |
| 7                | 1                | 0              | -1.445736               | 0.701040  | -1.713270 |
| 8                | 1                | 0              | -0.459486               | 2.176930  | 0.054695  |
| 9                | 16               | 0              | -1.555099               | -1.009887 | 0.044610  |
| 10               | 35               | 0              | 1.461141                | -0.036922 | -0.112849 |

**Halide Displacement Reactions in AN**

**Transition State for Fluorocyclobutane:** E = -312.3154340.

TC = 0.150630. Imaginary Frequency = -563.4248

| Center<br>Number | Atomic<br>Number | Atomic<br>Type | Coordinates (Angstroms) |           |           |
|------------------|------------------|----------------|-------------------------|-----------|-----------|
|                  |                  |                | X                       | Y         | Z         |
| 1                | 6                | 0              | -0.271509               | -0.535176 | -0.000016 |
| 2                | 1                | 0              | -0.294233               | -1.614885 | -0.000020 |
| 3                | 7                | 0              | -2.079581               | -0.341559 | -0.000012 |
| 4                | 1                | 0              | -2.477636               | -0.787501 | -0.829790 |
| 5                | 1                | 0              | -2.358007               | 0.641764  | -0.000612 |
| 6                | 1                | 0              | -2.477505               | -0.786455 | 0.830389  |
| 7                | 6                | 0              | 0.744843                | 1.348254  | 0.000019  |
| 8                | 1                | 0              | 0.383413                | 2.382365  | 0.000039  |
| 9                | 1                | 0              | 1.832762                | 1.334436  | 0.000019  |
| 10               | 6                | 0              | 0.148097                | 0.430122  | 1.104616  |
| 11               | 1                | 0              | -0.685416               | 0.887705  | 1.656995  |
| 12               | 1                | 0              | 0.861723                | 0.003977  | 1.805976  |
| 13               | 6                | 0              | 0.148147                | 0.430139  | -1.104623 |
| 14               | 1                | 0              | 0.861815                | 0.004010  | -1.805948 |
| 15               | 1                | 0              | -0.685330               | 0.887724  | -1.657053 |
| 16               | 9                | 0              | 1.664224                | -1.178029 | 0.000012  |

**Ground State for Fluorocyclobutane:** E = -255.9329401. TC = 0.110303.

| Center<br>Number | Atomic<br>Number | Atomic<br>Type | Coordinates (Angstroms) |           |           |
|------------------|------------------|----------------|-------------------------|-----------|-----------|
|                  |                  |                | X                       | Y         | Z         |
| 1                | 6                | 0              | -0.432316               | -1.077261 | -0.106968 |
| 2                | 6                | 0              | -1.541944               | 0.000007  | -0.002426 |
| 3                | 6                | 0              | -0.432304               | 1.077257  | -0.106958 |
| 4                | 6                | 0              | 0.519325                | -0.000009 | 0.396760  |
| 5                | 1                | 0              | -0.524203               | -2.000930 | 0.470802  |
| 6                | 1                | 0              | -0.214680               | -1.309542 | -1.154827 |

Supplementary Material (ESI) for Organic & Biomolecular Chemistry  
 This journal is (c) The Royal Society of Chemistry 2009

|    |   |   |           |           |           |
|----|---|---|-----------|-----------|-----------|
| 7  | 1 | 0 | -2.015031 | -0.000008 | 0.983947  |
| 8  | 1 | 0 | -2.316450 | 0.000033  | -0.773060 |
| 9  | 1 | 0 | -0.524137 | 2.000946  | 0.470786  |
| 10 | 1 | 0 | -0.214743 | 1.309531  | -1.154828 |
| 11 | 1 | 0 | 0.646085  | 0.000001  | 1.485073  |
| 12 | 9 | 0 | 1.831844  | 0.000001  | -0.156705 |

**Ground State for Chlorocyclobutane:** E = -615.9327035.

TC = 0.108773.

| Center<br>Number | Atomic<br>Number | Atomic<br>Type | Coordinates (Angstroms) |           |           |
|------------------|------------------|----------------|-------------------------|-----------|-----------|
|                  |                  |                | X                       | Y         | Z         |
| 1                | 6                | 0              | -0.869804               | 1.076763  | -0.106658 |
| 2                | 6                | 0              | -1.980932               | -0.000062 | -0.046338 |
| 3                | 6                | 0              | -0.869688               | -1.076753 | -0.106640 |
| 4                | 6                | 0              | 0.065006                | 0.000051  | 0.446895  |
| 5                | 1                | 0              | -0.619019               | 1.317351  | -1.145057 |
| 6                | 1                | 0              | -0.983515               | 1.997873  | 0.472132  |
| 7                | 1                | 0              | -2.722472               | -0.000091 | -0.849716 |
| 8                | 1                | 0              | -2.493425               | -0.000110 | 0.920353  |
| 9                | 1                | 0              | -0.618812               | -1.317334 | -1.145022 |
| 10               | 1                | 0              | -0.983328               | -1.997867 | 0.472159  |
| 11               | 1                | 0              | 0.084115                | 0.000076  | 1.541671  |
| 12               | 17               | 0              | 1.780527                | 0.000006  | -0.081769 |

**Transition State for Chlorocyclobutane:** E = -672.1835728.

TC = 0.147790. Imaginary Frequency = -619.7673.

| Center<br>Number | Atomic<br>Number | Atomic<br>Type | Coordinates (Angstroms) |           |           |
|------------------|------------------|----------------|-------------------------|-----------|-----------|
|                  |                  |                | X                       | Y         | Z         |
| 1                | 6                | 0              | 0.273080                | -0.441683 | 0.000293  |
| 2                | 1                | 0              | 0.203054                | -1.517710 | 0.000660  |
| 3                | 7                | 0              | 2.409162                | -1.012322 | 0.000004  |
| 4                | 1                | 0              | 2.620607                | -1.583660 | 0.825226  |
| 5                | 1                | 0              | 3.070456                | -0.228323 | -0.000685 |
| 6                | 1                | 0              | 2.620013                | -1.584612 | -0.824711 |
| 7                | 6                | 0              | 0.221546                | 1.693810  | -0.000306 |
| 8                | 1                | 0              | 0.983427                | 2.478074  | -0.000538 |
| 9                | 1                | 0              | -0.768621               | 2.152716  | -0.000398 |
| 10               | 6                | 0              | 0.381853                | 0.602252  | -1.095970 |
| 11               | 1                | 0              | 1.368518                | 0.608350  | -1.565300 |
| 12               | 1                | 0              | -0.375479               | 0.558736  | -1.879380 |
| 13               | 17               | 0              | -2.066481               | -0.571159 | 0.000027  |
| 14               | 6                | 0              | 0.381951                | 0.602863  | 1.095961  |
| 15               | 1                | 0              | -0.375194               | 0.559771  | 1.879577  |
| 16               | 1                | 0              | 1.368673                | 0.609163  | 1.565183  |

**Transition State for 2-Fluoroazetidine:** E = -328.3698657.

TC = 0.135624. Imaginary Frequency = -210.2841

| Center<br>Number | Atomic<br>Number | Atomic<br>Type | Coordinates (Angstroms) |           |          |
|------------------|------------------|----------------|-------------------------|-----------|----------|
|                  |                  |                | X                       | Y         | Z        |
| 1                | 6                | 0              | 0.521692                | -0.180248 | 0.658159 |
| 2                | 1                | 0              | 0.626775                | -0.850674 | 1.507558 |

Supplementary Material (ESI) for Organic & Biomolecular Chemistry  
 This journal is (c) The Royal Society of Chemistry 2009

|    |   |   |           |           |           |
|----|---|---|-----------|-----------|-----------|
| 3  | 7 | 0 | 2.330087  | -1.089821 | -0.149392 |
| 4  | 1 | 0 | 3.094126  | -1.012589 | 0.529968  |
| 5  | 1 | 0 | 2.645316  | -0.635457 | -1.013004 |
| 6  | 1 | 0 | 2.205789  | -2.086415 | -0.357958 |
| 7  | 7 | 0 | 0.658818  | 1.126094  | 0.684129  |
| 8  | 6 | 0 | 0.035128  | 1.347909  | -0.635417 |
| 9  | 1 | 0 | 0.767294  | 1.615541  | -1.402716 |
| 10 | 1 | 0 | -0.787272 | 2.066237  | -0.609123 |
| 11 | 6 | 0 | -0.342589 | -0.161985 | -0.573172 |
| 12 | 1 | 0 | -0.025342 | -0.789459 | -1.407086 |
| 13 | 1 | 0 | -1.403494 | -0.331421 | -0.336170 |
| 14 | 1 | 0 | 1.150354  | 1.750101  | 1.348699  |
| 15 | 9 | 0 | -3.386807 | -0.668204 | 0.144361  |

**Ground State for 2-Fluoroazetidone:** E = -271.9534255. TC = 0.097599.

| Center Number | Atomic Number | Atomic Type | Coordinates (Angstroms) |           |           |
|---------------|---------------|-------------|-------------------------|-----------|-----------|
|               |               |             | X                       | Y         | Z         |
| 1             | 6             | 0           | -1.497784               | -0.052846 | -0.116112 |
| 2             | 6             | 0           | 0.507584                | -0.029382 | 0.407645  |
| 3             | 6             | 0           | -0.454819               | 1.078672  | 0.002519  |
| 4             | 1             | 0           | -2.133450               | -0.073272 | -1.005133 |
| 5             | 1             | 0           | -2.117721               | -0.141484 | 0.783007  |
| 6             | 7             | 0           | -0.366699               | -1.027187 | -0.152077 |
| 7             | 1             | 0           | -0.475561               | -1.891624 | 0.398095  |
| 8             | 9             | 0           | 1.782350                | 0.007331  | -0.234721 |
| 9             | 1             | 0           | -0.636009               | 1.874163  | 0.727569  |
| 10            | 1             | 0           | -0.179254               | 1.500723  | -0.967078 |
| 11            | 1             | 0           | 0.737849                | -0.122836 | 1.476255  |

**Transition State for 2-Chloroazetidone:** E = -688.3991133.  
 TC = 0.135550. Imaginary Frequency = -222.815.

| Center Number | Atomic Number | Atomic Type | Coordinates (Angstroms) |           |           |
|---------------|---------------|-------------|-------------------------|-----------|-----------|
|               |               |             | X                       | Y         | Z         |
| 1             | 6             | 0           | -0.621595               | -0.348896 | -0.209248 |
| 2             | 1             | 0           | -0.192462               | -1.304785 | -0.491194 |
| 3             | 7             | 0           | -2.515662               | -1.373757 | 0.031284  |
| 4             | 1             | 0           | -2.751408               | -1.857678 | -0.841443 |
| 5             | 1             | 0           | -3.286131               | -0.729230 | 0.238778  |
| 6             | 1             | 0           | -2.497490               | -2.078115 | 0.776871  |
| 7             | 7             | 0           | -0.778150               | 0.693396  | -0.992207 |
| 8             | 6             | 0           | -0.992051               | 1.657486  | 0.103083  |
| 9             | 1             | 0           | -2.029849               | 1.995423  | 0.173511  |
| 10            | 1             | 0           | -0.303533               | 2.504893  | 0.070377  |
| 11            | 6             | 0           | -0.609663               | 0.480284  | 1.048219  |
| 12            | 1             | 0           | -1.321388               | 0.213474  | 1.829877  |
| 13            | 1             | 0           | 0.399972                | 0.570791  | 1.454688  |
| 14            | 1             | 0           | -0.824529               | 0.774233  | -2.023435 |
| 15            | 17            | 0           | 2.894315                | -0.356455 | -0.006700 |

**Ground State for 2-Chloroazetidone:** E = -631.9589493. TC = 0.096608.

| Center Number | Atomic Number | Atomic Type | Coordinates (Angstroms) |           |           |
|---------------|---------------|-------------|-------------------------|-----------|-----------|
|               |               |             | X                       | Y         | Z         |
| 1             | 6             | 0           | -1.928465               | -0.052969 | -0.145829 |

Supplementary Material (ESI) for Organic & Biomolecular Chemistry  
 This journal is (c) The Royal Society of Chemistry 2009

|    |    |   |           |           |           |
|----|----|---|-----------|-----------|-----------|
| 2  | 6  | 0 | 0.044035  | -0.026791 | 0.465633  |
| 3  | 6  | 0 | -0.889364 | 1.079223  | -0.021011 |
| 4  | 1  | 0 | -2.558089 | -0.075137 | -1.039156 |
| 5  | 1  | 0 | -2.552413 | -0.140579 | 0.751914  |
| 6  | 1  | 0 | 0.115417  | -0.105744 | 1.557688  |
| 7  | 1  | 0 | -0.587042 | 1.467359  | -0.996592 |
| 8  | 1  | 0 | -1.090180 | 1.898469  | 0.672190  |
| 9  | 7  | 0 | -0.795858 | -1.026945 | -0.173637 |
| 10 | 1  | 0 | -0.923793 | -1.894702 | 0.369656  |
| 11 | 17 | 0 | 1.753522  | 0.002481  | -0.111353 |

**Transition State for 3-Chloroazetidone:** E = -688.3456908.

TC = 0.135983. Imaginary Frequency = -657.535.

| Center<br>Number | Atomic<br>Number | Atomic<br>Type | Coordinates (Angstroms) |           |           |
|------------------|------------------|----------------|-------------------------|-----------|-----------|
|                  |                  |                | X                       | Y         | Z         |
| 1                | 6                | 0              | -0.436501               | 0.566985  | 1.068875  |
| 2                | 6                | 0              | -0.436263               | 0.566652  | -1.068916 |
| 3                | 1                | 0              | 0.446265                | 0.984494  | 1.557093  |
| 4                | 1                | 0              | -1.155792               | 0.253713  | 1.829946  |
| 5                | 1                | 0              | -0.573904               | 2.382722  | -0.000074 |
| 6                | 1                | 0              | 0.446581                | 0.984070  | -1.557036 |
| 7                | 1                | 0              | -1.155448               | 0.253329  | -1.830075 |
| 8                | 1                | 0              | 0.066532                | -1.520166 | 0.000281  |
| 9                | 6                | 0              | -0.100092               | -0.455786 | 0.000159  |
| 10               | 1                | 0              | -2.353387               | -1.731436 | -0.824392 |
| 11               | 1                | 0              | -2.355530               | -1.727161 | 0.826947  |
| 12               | 1                | 0              | -2.824373               | -0.370648 | -0.002858 |
| 13               | 7                | 0              | -2.161649               | -1.152034 | 0.000038  |
| 14               | 17               | 0              | 2.206222                | -0.333000 | 0.000034  |
| 15               | 7                | 0              | -1.011149               | 1.449889  | -0.000198 |

**Ground State for 3-Chloroazetidone:** E = -631.9505733. TC = 0.096661.

| Center<br>Number | Atomic<br>Number | Atomic<br>Type | Coordinates (Angstroms) |           |           |
|------------------|------------------|----------------|-------------------------|-----------|-----------|
|                  |                  |                | X                       | Y         | Z         |
| 1                | 6                | 0              | -0.074299               | 0.000019  | 0.689623  |
| 2                | 6                | 0              | 0.919019                | 1.045967  | 0.167394  |
| 3                | 6                | 0              | 0.919083                | -1.045953 | 0.167406  |
| 4                | 1                | 0              | 1.581921                | -1.375171 | 0.980330  |
| 5                | 1                | 0              | 0.516638                | -1.916892 | -0.358286 |
| 6                | 7                | 0              | 1.517350                | -0.000004 | -0.707158 |
| 7                | 1                | 0              | 2.547482                | -0.000070 | -0.721968 |
| 8                | 1                | 0              | 1.581913                | 1.375250  | 0.980266  |
| 9                | 1                | 0              | -0.320558               | 0.000076  | 1.753460  |
| 10               | 1                | 0              | 0.516673                | 1.916883  | -0.358426 |
| 11               | 17               | 0              | -1.625197               | -0.000014 | -0.204224 |

**Transition State for 2,2-Dichloroazetidone:** E = -1147.5071610.

TC = 0.125940. Imaginary Frequency = -283.5000.

| Center<br>Number | Atomic<br>Number | Atomic<br>Type | Coordinates (Angstroms) |          |          |
|------------------|------------------|----------------|-------------------------|----------|----------|
|                  |                  |                | X                       | Y        | Z        |
| 1                | 6                | 0              | -0.735228               | 0.023507 | 0.045427 |

Supplementary Material (ESI) for Organic & Biomolecular Chemistry  
 This journal is (c) The Royal Society of Chemistry 2009

|    |    |   |           |           |           |
|----|----|---|-----------|-----------|-----------|
| 2  | 7  | 0 | -2.832700 | -0.473923 | -0.200572 |
| 3  | 1  | 0 | -3.348945 | -0.060643 | 0.584687  |
| 4  | 1  | 0 | -3.024386 | -1.482557 | -0.193882 |
| 5  | 1  | 0 | -3.232102 | -0.090977 | -1.065304 |
| 6  | 7  | 0 | -0.293123 | -0.673746 | 1.063049  |
| 7  | 6  | 0 | 0.085485  | -1.832316 | 0.224937  |
| 8  | 1  | 0 | -0.614401 | -2.665381 | 0.334369  |
| 9  | 1  | 0 | 1.120201  | -2.139009 | 0.379850  |
| 10 | 6  | 0 | -0.179244 | -0.906876 | -0.995361 |
| 11 | 1  | 0 | -0.855880 | -1.253604 | -1.775597 |
| 12 | 1  | 0 | 0.755214  | -0.514284 | -1.403707 |
| 13 | 1  | 0 | -0.348377 | -0.513955 | 2.088644  |
| 14 | 17 | 0 | 3.106427  | 0.232545  | -0.078292 |
| 15 | 17 | 0 | -0.965053 | 1.711467  | 0.040856  |

**Ground State for 2,2-Dichloroazetidene:** E = -1147.5071610.  
 TC = 0.087497.

| Center<br>Number | Atomic<br>Number | Atomic<br>Type | Coordinates (Angstroms) |           |           |
|------------------|------------------|----------------|-------------------------|-----------|-----------|
|                  |                  |                | X                       | Y         | Z         |
| 1                | 6                | 0              | 2.009903                | -0.532327 | -0.088657 |
| 2                | 6                | 0              | -0.013643               | -0.129967 | -0.002304 |
| 3                | 6                | 0              | 0.986471                | -0.576019 | 1.066511  |
| 4                | 1                | 0              | 2.698126                | -1.375349 | -0.183493 |
| 5                | 1                | 0              | 2.557807                | 0.415891  | -0.132890 |
| 6                | 7                | 0              | 0.855865                | -0.595302 | -1.025991 |
| 7                | 1                | 0              | 0.883711                | -0.076282 | -1.919072 |
| 8                | 1                | 0              | 1.126485                | 0.088477  | 1.919846  |
| 9                | 1                | 0              | 0.780080                | -1.597077 | 1.396603  |
| 10               | 17               | 0              | -1.648594               | -0.849800 | -0.009906 |
| 11               | 17               | 0              | -0.229856               | 1.681643  | 0.024473  |

**Transition State for 2-Bromoazetidene:** E = -2801.6015183.  
 TC = 0.135577. Imaginary Frequency = -234.5142.

| Center<br>Number | Atomic<br>Number | Atomic<br>Type | Coordinates (Angstroms) |           |           |
|------------------|------------------|----------------|-------------------------|-----------|-----------|
|                  |                  |                | X                       | Y         | Z         |
| 1                | 6                | 0              | -1.260151               | -0.343363 | -0.139548 |
| 2                | 1                | 0              | -0.764359               | -1.288758 | -0.329768 |
| 3                | 7                | 0              | -3.105150               | -1.432158 | 0.014173  |
| 4                | 1                | 0              | -3.255978               | -1.960346 | -0.851874 |
| 5                | 1                | 0              | -3.917285               | -0.818440 | 0.141259  |
| 6                | 1                | 0              | -3.106569               | -2.105922 | 0.788006  |
| 7                | 7                | 0              | -1.399829               | 0.645735  | -0.993181 |
| 8                | 6                | 0              | -1.741919               | 1.657375  | 0.022345  |
| 9                | 1                | 0              | -2.795997               | 1.948540  | -0.005039 |
| 10               | 1                | 0              | -1.091335               | 2.534552  | -0.007423 |
| 11               | 6                | 0              | -1.383545               | 0.555634  | 1.063703  |
| 12               | 1                | 0              | -2.143412               | 0.299414  | 1.802607  |
| 13               | 1                | 0              | -0.416328               | 0.721365  | 1.542897  |
| 14               | 1                | 0              | -1.370832               | 0.665232  | -2.027433 |
| 15               | 35               | 0              | 2.191732                | -0.163101 | 0.003452  |

**Ground State for 2-Bromoazetidene:** E = -2745.1520877. TC = 0.095828.

| Center<br>Number | Atomic<br>Number | Atomic<br>Type | Coordinates (Angstroms) |   |   |
|------------------|------------------|----------------|-------------------------|---|---|
|                  |                  |                | X                       | Y | Z |

Supplementary Material (ESI) for Organic & Biomolecular Chemistry  
 This journal is (c) The Royal Society of Chemistry 2009

| Center Number | Atomic Number | Atomic Type | X         | Y         | Z         |
|---------------|---------------|-------------|-----------|-----------|-----------|
| 1             | 6             | 0           | 2.003243  | -0.088844 | -0.726767 |
| 2             | 6             | 0           | 0.602503  | -0.005172 | 0.802886  |
| 3             | 6             | 0           | 1.473432  | 1.069644  | 0.152722  |
| 4             | 1             | 0           | 3.082957  | -0.163799 | -0.880398 |
| 5             | 1             | 0           | 1.478595  | -0.161561 | -1.687614 |
| 6             | 7             | 0           | 1.468345  | -1.005082 | 0.306840  |
| 7             | 1             | 0           | 1.122502  | -1.948087 | 0.074935  |
| 8             | 1             | 0           | 0.973144  | 1.905089  | -0.337423 |
| 9             | 1             | 0           | 2.230281  | 1.435786  | 0.853279  |
| 10            | 1             | 0           | 0.325339  | -0.013246 | 1.859274  |
| 11            | 35            | 0           | -1.256180 | 0.003646  | -0.097228 |

**Transition State for 2-Fluorooxetane:** E = -348.1976540.

TC = 0.123618. Imaginary Frequency = -383.9887.

| Center Number | Atomic Number | Atomic Type | X         | Y         | Z         |
|---------------|---------------|-------------|-----------|-----------|-----------|
| 1             | 6             | 0           | 0.032642  | -0.449869 | -0.070195 |
| 2             | 1             | 0           | 0.021668  | -1.517014 | -0.227823 |
| 3             | 7             | 0           | -2.230787 | -0.717100 | 0.025956  |
| 4             | 1             | 0           | -2.519462 | -1.301053 | -0.765390 |
| 5             | 1             | 0           | -2.751996 | 0.162367  | -0.052972 |
| 6             | 1             | 0           | -2.562822 | -1.184228 | 0.876046  |
| 7             | 6             | 0           | 0.181461  | 1.549060  | -0.081764 |
| 8             | 1             | 0           | -0.700079 | 2.179067  | -0.205949 |
| 9             | 1             | 0           | 1.111000  | 2.094113  | -0.243254 |
| 10            | 6             | 0           | 0.153636  | 0.514230  | 1.058600  |
| 11            | 1             | 0           | -0.692246 | 0.567976  | 1.743208  |
| 12            | 1             | 0           | 1.094857  | 0.405461  | 1.595512  |
| 13            | 9             | 0           | 2.173251  | -1.038017 | 0.009632  |
| 14            | 8             | 0           | 0.106112  | 0.409329  | -1.053452 |

**Ground State for 2-Fluorooxetane:** E = -291.7853099. TC = 0.085128.

| Center Number | Atomic Number | Atomic Type | X         | Y         | Z         |
|---------------|---------------|-------------|-----------|-----------|-----------|
| 1             | 1             | 0           | -0.762343 | -1.846015 | 0.639078  |
| 2             | 6             | 0           | -0.475259 | -1.038172 | -0.038227 |
| 3             | 1             | 0           | -0.224729 | -1.425464 | -1.032769 |
| 4             | 6             | 0           | 0.524896  | -0.000031 | 0.447465  |
| 5             | 6             | 0           | -0.475143 | 1.038176  | -0.038212 |
| 6             | 1             | 0           | 0.737516  | -0.000019 | 1.520226  |
| 7             | 1             | 0           | -0.762182 | 1.846058  | 0.639052  |
| 8             | 1             | 0           | -0.224645 | 1.425415  | -1.032777 |
| 9             | 8             | 0           | -1.508494 | 0.000051  | -0.113720 |
| 10            | 9             | 0           | 1.761930  | -0.000024 | -0.227690 |

**Transition State for 2-Chlorooxetane:** E = -708.2223341.

TC = 0.121945. Imaginary Frequency = -212.5777.

| Center Number | Atomic Number | Atomic Type | X         | Y         | Z         |
|---------------|---------------|-------------|-----------|-----------|-----------|
| 1             | 6             | 0           | -0.222676 | -0.312264 | -0.042187 |
| 2             | 1             | 0           | -0.171996 | -1.386682 | -0.165099 |
| 3             | 7             | 0           | -2.730621 | -1.088905 | 0.026644  |

Supplementary Material (ESI) for Organic & Biomolecular Chemistry  
 This journal is (c) The Royal Society of Chemistry 2009

|    |    |   |           |           |           |
|----|----|---|-----------|-----------|-----------|
| 4  | 1  | 0 | -2.880864 | -1.671447 | -0.801567 |
| 5  | 1  | 0 | -3.405560 | -0.321627 | -0.038414 |
| 6  | 1  | 0 | -3.017605 | -1.654501 | 0.830461  |
| 7  | 6  | 0 | -0.486886 | 1.670615  | -0.111541 |
| 8  | 1  | 0 | -1.446932 | 2.159663  | -0.276712 |
| 9  | 1  | 0 | 0.363607  | 2.329218  | -0.286883 |
| 10 | 6  | 0 | -0.375544 | 0.674477  | 1.056676  |
| 11 | 1  | 0 | -1.294490 | 0.533721  | 1.628262  |
| 12 | 1  | 0 | 0.482358  | 0.791314  | 1.717067  |
| 13 | 17 | 0 | 2.354787  | -0.546819 | 0.008907  |
| 14 | 8  | 0 | -0.379363 | 0.492705  | -1.045340 |

**Ground State for 2-Chlorooxetane:** E = -651.8048500. TC = 0.084170.

| Center<br>Number | Atomic<br>Number | Atomic<br>Type | Coordinates (Angstroms) |           |           |
|------------------|------------------|----------------|-------------------------|-----------|-----------|
|                  |                  |                | X                       | Y         | Z         |
| 1                | 1                | 0              | 0.282068                | 0.000208  | 1.727947  |
| 2                | 6                | 0              | 0.030972                | 0.027268  | 0.664671  |
| 3                | 6                | 0              | -0.945477               | 1.060509  | 0.112879  |
| 4                | 6                | 0              | -1.617753               | -0.142316 | -0.556118 |
| 5                | 1                | 0              | -1.552016               | 1.504340  | 0.906719  |
| 6                | 1                | 0              | -2.680362               | -0.304355 | -0.366710 |
| 7                | 1                | 0              | -1.385786               | -0.274904 | -1.616768 |
| 8                | 8                | 0              | -0.799164               | -1.055136 | 0.265686  |
| 9                | 1                | 0              | -0.535573               | 1.838895  | -0.532254 |
| 10               | 17               | 0              | 1.615208                | 0.000243  | -0.210177 |

**Transition State for 2-Bromooxetane:** E = -2821.4222808.

TC = 0.121770. Imaginary Frequency = -189.4920.

| Center<br>Number | Atomic<br>Number | Atomic<br>Type | Coordinates (Angstroms) |           |           |
|------------------|------------------|----------------|-------------------------|-----------|-----------|
|                  |                  |                | X                       | Y         | Z         |
| 1                | 6                | 0              | -0.820581               | -0.246121 | -0.028544 |
| 2                | 1                | 0              | -0.658694               | -1.311394 | -0.136825 |
| 3                | 7                | 0              | -3.233436               | -1.280526 | 0.028508  |
| 4                | 1                | 0              | -3.346836               | -1.758676 | -0.869447 |
| 5                | 1                | 0              | -4.006536               | -0.612534 | 0.096276  |
| 6                | 1                | 0              | -3.402428               | -1.985974 | 0.751144  |
| 7                | 6                | 0              | -1.303525               | 1.694115  | -0.124491 |
| 8                | 1                | 0              | -2.314941               | 2.063253  | -0.295026 |
| 9                | 1                | 0              | -0.536734               | 2.446616  | -0.309208 |
| 10               | 6                | 0              | -1.077632               | 0.732812  | 1.057476  |
| 11               | 1                | 0              | -1.971708               | 0.496913  | 1.637721  |
| 12               | 1                | 0              | -0.235719               | 0.956042  | 1.711354  |
| 13               | 8                | 0              | -1.058078               | 0.524613  | -1.043562 |
| 14               | 35               | 0              | 1.908077                | -0.246066 | 0.003895  |

**Ground State for 2-Bromooxetane:** E = -2764.9964819. TC = 0.083643.

| Center<br>Number | Atomic<br>Number | Atomic<br>Type | Coordinates (Angstroms) |           |           |
|------------------|------------------|----------------|-------------------------|-----------|-----------|
|                  |                  |                | X                       | Y         | Z         |
| 1                | 1                | 0              | -0.367337               | -0.018720 | 1.814951  |
| 2                | 6                | 0              | -0.563321               | 0.017296  | 0.740531  |
| 3                | 6                | 0              | -1.473245               | 1.060877  | 0.111758  |
| 4                | 6                | 0              | -2.067745               | -0.135709 | -0.641726 |
| 5                | 1                | 0              | -2.162334               | 1.480463  | 0.850644  |



Supplementary Material (ESI) for Organic & Biomolecular Chemistry  
 This journal is (c) The Royal Society of Chemistry 2009

|    |    |   |           |           |           |
|----|----|---|-----------|-----------|-----------|
| 6  | 1  | 0 | -3.145123 | -0.299438 | -0.582051 |
| 7  | 1  | 0 | -1.705977 | -0.263491 | -1.666079 |
| 8  | 8  | 0 | -1.351868 | -1.054174 | 0.268979  |
| 9  | 1  | 0 | -1.010305 | 1.856008  | -0.473446 |
| 10 | 35 | 0 | 1.252340  | 0.000680  | -0.095978 |

**HALIDE DISPLACEMENT REACTIONS in the GAS PHASE**

**Transition State for Fluorocyclobutane:** E = -312.3154340.

TC = 0.150630. Imaginary Frequency = -563.4139.

| Center<br>Number | Atomic<br>Number | Atomic<br>Type | Coordinates (Angstroms) |           |           |
|------------------|------------------|----------------|-------------------------|-----------|-----------|
|                  |                  |                | X                       | Y         | Z         |
| 1                | 6                | 0              | 0.271634                | -0.535101 | -0.000010 |
| 2                | 1                | 0              | 0.294397                | -1.614796 | -0.000013 |
| 3                | 7                | 0              | 2.079675                | -0.341358 | -0.000007 |
| 4                | 1                | 0              | 2.477662                | -0.786421 | 0.830279  |
| 5                | 1                | 0              | 2.358053                | 0.641982  | -0.000385 |
| 6                | 1                | 0              | 2.477746                | -0.787082 | -0.829898 |
| 7                | 6                | 0              | -0.745296               | 1.347984  | 0.000012  |
| 8                | 1                | 0              | -0.384447               | 2.382297  | 0.000017  |
| 9                | 1                | 0              | -1.833202               | 1.333513  | 0.000026  |
| 10               | 6                | 0              | -0.148123               | 0.430161  | -1.104607 |
| 11               | 1                | 0              | 0.685320                | 0.888081  | -1.656810 |
| 12               | 1                | 0              | -0.861502               | 0.003905  | -1.806165 |
| 13               | 6                | 0              | -0.148093               | 0.430150  | 1.104602  |
| 14               | 1                | 0              | -0.861445               | 0.003884  | 1.806181  |
| 15               | 1                | 0              | 0.685371                | 0.888069  | 1.656775  |
| 16               | 9                | 0              | -1.664045               | -1.178122 | 0.000006  |

**Ground State for Fluorocyclobutane:** E = -312.2639963. TC = 0.151471.

| Center<br>Number | Atomic<br>Number | Atomic<br>Type | Coordinates (Angstroms) |           |           |
|------------------|------------------|----------------|-------------------------|-----------|-----------|
|                  |                  |                | X                       | Y         | Z         |
| 1                | 6                | 0              | -1.222459               | -0.019921 | -1.076229 |
| 2                | 6                | 0              | -2.103556               | -0.687039 | 0.009607  |
| 3                | 6                | 0              | -1.223448               | 0.011882  | 1.076071  |
| 4                | 6                | 0              | -0.146438               | 0.084877  | -0.000898 |
| 5                | 1                | 0              | -0.991223               | -0.569857 | -1.992053 |
| 6                | 1                | 0              | -1.597891               | 0.977174  | -1.326275 |
| 7                | 1                | 0              | -1.973569               | -1.772789 | 0.025710  |
| 8                | 1                | 0              | -3.171661               | -0.458316 | 0.005736  |
| 9                | 1                | 0              | -0.993070               | -0.510753 | 2.007958  |
| 10               | 1                | 0              | -1.599091               | 1.015926  | 1.296202  |
| 11               | 1                | 0              | 0.550650                | -0.756130 | 0.011818  |
| 12               | 1                | 0              | 3.730256                | -0.698023 | 0.830073  |
| 13               | 7                | 0              | 3.132141                | -0.635435 | 0.009183  |
| 14               | 1                | 0              | 3.729771                | -0.721937 | -0.809886 |
| 15               | 1                | 0              | 2.721387                | 0.296666  | -0.004282 |
| 16               | 9                | 0              | 0.649429                | 1.256365  | -0.017844 |

**Transition State for Chlorocyclobutane:** E = -312.3154340.

TC= 0.149864. Imaginary Frequency = -590.9614.

| Center<br>Number | Atomic<br>Number | Atomic<br>Type | Coordinates (Angstroms) |   |   |
|------------------|------------------|----------------|-------------------------|---|---|
|                  |                  |                | X                       | Y | Z |

Supplementary Material (ESI) for Organic & Biomolecular Chemistry  
 This journal is (c) The Royal Society of Chemistry 2009

|    |    |   |           |           |           |
|----|----|---|-----------|-----------|-----------|
| 1  | 6  | 0 | 0.407182  | -0.474881 | 0.000009  |
| 2  | 1  | 0 | 0.119259  | -1.512430 | -0.000077 |
| 3  | 7  | 0 | 2.285606  | -1.001509 | 0.000003  |
| 4  | 1  | 0 | 2.482469  | -1.566485 | 0.828648  |
| 5  | 1  | 0 | 2.922330  | -0.202971 | -0.000426 |
| 6  | 1  | 0 | 2.482313  | -1.567157 | -0.828236 |
| 7  | 6  | 0 | 0.213093  | 1.655170  | -0.000008 |
| 8  | 1  | 0 | 0.931890  | 2.480378  | -0.000021 |
| 9  | 1  | 0 | -0.801255 | 2.051154  | -0.000011 |
| 10 | 6  | 0 | 0.424587  | 0.578088  | -1.102133 |
| 11 | 1  | 0 | 1.392397  | 0.664963  | -1.611619 |
| 12 | 1  | 0 | -0.360431 | 0.480403  | -1.849112 |
| 13 | 17 | 0 | -2.059839 | -0.528330 | 0.000009  |
| 14 | 6  | 0 | 0.424619  | 0.578103  | 1.102134  |
| 15 | 1  | 0 | -0.360331 | 0.480436  | 1.849188  |
| 16 | 1  | 0 | 1.392494  | 0.664999  | 1.611490  |

**Ground State for Chlorocyclobutane:** E = -672.3696321. TC = 0.150579.

| Center<br>Number | Atomic<br>Number | Atomic<br>Type | Coordinates (Angstroms) |           |           |
|------------------|------------------|----------------|-------------------------|-----------|-----------|
|                  |                  |                | X                       | Y         | Z         |
| 1                | 6                | 0              | 1.328530                | -0.234513 | 1.076271  |
| 2                | 6                | 0              | 2.119293                | -1.016779 | -0.000272 |
| 3                | 6                | 0              | 1.333818                | -0.227228 | -1.075384 |
| 4                | 6                | 0              | 0.263742                | -0.017708 | -0.001461 |
| 5                | 1                | 0              | 1.025842                | -0.745608 | 1.994351  |
| 6                | 1                | 0              | 1.832184                | 0.704634  | 1.325811  |
| 7                | 1                | 0              | 1.855250                | -2.078132 | -0.004467 |
| 8                | 1                | 0              | 3.208000                | -0.918970 | 0.002696  |
| 9                | 1                | 0              | 1.035668                | -0.731976 | -1.998447 |
| 10               | 1                | 0              | 1.838579                | 0.713637  | -1.316047 |
| 11               | 1                | 0              | -0.486952               | -0.810611 | -0.005704 |
| 12               | 17               | 0              | -0.650254               | 1.521286  | 0.001552  |
| 13               | 1                | 0              | -3.368048               | -1.651653 | -0.820842 |
| 14               | 7                | 0              | -2.848468               | -1.341384 | -0.002363 |
| 15               | 1                | 0              | -3.362304               | -1.653492 | 0.819043  |
| 16               | 1                | 0              | -2.856929               | -0.322642 | -0.001162 |

**Transition State for 2-Fluoroazetidone:** E = -328.3017640.

TC= 0.138610. Imaginary Frequency = -493.1080.

| Center<br>Number | Atomic<br>Number | Atomic<br>Type | Coordinates (Angstroms) |           |           |
|------------------|------------------|----------------|-------------------------|-----------|-----------|
|                  |                  |                | X                       | Y         | Z         |
| 1                | 6                | 0              | -0.267250               | -0.444484 | 0.032597  |
| 2                | 1                | 0              | -0.201476               | -1.520157 | 0.074124  |
| 3                | 7                | 0              | -2.182120               | -0.402333 | 0.004845  |
| 4                | 1                | 0              | -2.492441               | -0.949791 | -0.799942 |
| 5                | 1                | 0              | -2.448979               | 0.569435  | -0.159421 |
| 6                | 1                | 0              | -2.655008               | -0.748606 | 0.842878  |
| 7                | 7                | 0              | 0.052146                | 0.346407  | -1.058224 |
| 8                | 6                | 0              | 0.738557                | 1.333121  | -0.165112 |
| 9                | 1                | 0              | 0.431167                | 2.366439  | -0.347477 |
| 10               | 1                | 0              | 1.820034                | 1.211849  | -0.198430 |
| 11               | 6                | 0              | 0.123436                | 0.598968  | 1.053667  |
| 12               | 1                | 0              | -0.706434               | 1.123957  | 1.537472  |
| 13               | 1                | 0              | 0.838083                | 0.228045  | 1.784078  |

Supplementary Material (ESI) for Organic & Biomolecular Chemistry  
 This journal is (c) The Royal Society of Chemistry 2009

|    |   |   |          |           |           |
|----|---|---|----------|-----------|-----------|
| 14 | 1 | 0 | 0.633814 | -0.128771 | -1.747120 |
| 15 | 9 | 0 | 1.791400 | -1.187395 | 0.095620  |

**Transition State for 2-Chloroazetidone:** E = -688.3336221. TC= 0.138156.  
 Imaginary Frequency = -371.9539.

| Center<br>Number | Atomic<br>Number | Atomic<br>Type | Coordinates (Angstroms) |           |           |
|------------------|------------------|----------------|-------------------------|-----------|-----------|
|                  |                  |                | X                       | Y         | Z         |
| 1                | 6                | 0              | -0.570757               | -0.362478 | 0.012156  |
| 2                | 1                | 0              | -0.142065               | -1.353648 | 0.048701  |
| 3                | 7                | 0              | -2.451013               | -1.079217 | 0.001584  |
| 4                | 1                | 0              | -2.549547               | -1.742061 | -0.769450 |
| 5                | 1                | 0              | -3.072274               | -0.290024 | -0.182442 |
| 6                | 1                | 0              | -2.749583               | -1.541930 | 0.862722  |
| 7                | 7                | 0              | -0.473686               | 0.484595  | -1.028655 |
| 8                | 6                | 0              | -0.233070               | 1.660878  | -0.151598 |
| 9                | 1                | 0              | -0.891460               | 2.508826  | -0.354016 |
| 10               | 1                | 0              | 0.821575                | 1.940384  | -0.166298 |
| 11               | 6                | 0              | -0.569401               | 0.735539  | 1.048293  |
| 12               | 1                | 0              | -1.522818               | 0.929478  | 1.545302  |
| 13               | 1                | 0              | 0.236378                | 0.620409  | 1.772323  |
| 14               | 1                | 0              | 0.107720                | 0.252705  | -1.832052 |
| 15               | 17               | 0              | 2.263196                | -0.550907 | 0.047741  |

**Transition State for 3-Chloroazetidone:** E = -688.3083976. TC = 0.138420.  
 Imaginary Frequency = -628.4952.

| Center<br>Number | Atomic<br>Number | Atomic<br>Type | Coordinates (Angstroms) |           |           |
|------------------|------------------|----------------|-------------------------|-----------|-----------|
|                  |                  |                | X                       | Y         | Z         |
| 1                | 6                | 0              | 0.462418                | 0.536941  | -1.067540 |
| 2                | 6                | 0              | 0.462529                | 0.536836  | 1.067582  |
| 3                | 1                | 0              | -0.463566               | 0.943652  | -1.470698 |
| 4                | 1                | 0              | 1.139362                | 0.269869  | -1.886980 |
| 5                | 1                | 0              | 0.776426                | 2.343688  | 0.000072  |
| 6                | 1                | 0              | -0.463406               | 0.943533  | 1.470869  |
| 7                | 1                | 0              | 1.139560                | 0.269683  | 1.886915  |
| 8                | 1                | 0              | -0.180590               | -1.519723 | -0.000076 |
| 9                | 6                | 0              | 0.195078                | -0.513201 | -0.000039 |
| 10               | 1                | 0              | 2.255135                | -1.705214 | 0.828598  |
| 11               | 1                | 0              | 2.255375                | -1.704881 | -0.828868 |
| 12               | 1                | 0              | 2.627010                | -0.301593 | 0.000283  |
| 13               | 7                | 0              | 2.046324                | -1.145935 | -0.000054 |
| 14               | 17               | 0              | -2.226207               | -0.265834 | 0.000013  |
| 15               | 7                | 0              | 1.102257                | 1.376895  | 0.000004  |

**Transition State for 2,2-Dichloroazetidone:** E = -1147.4735691. TC=  
 0.127758. Imaginary Frequency = -329.5316.

| Center<br>Number | Atomic<br>Number | Atomic<br>Type | Coordinates (Angstroms) |           |           |
|------------------|------------------|----------------|-------------------------|-----------|-----------|
|                  |                  |                | X                       | Y         | Z         |
| 1                | 6                | 0              | 0.922675                | 0.070429  | -0.117192 |
| 2                | 7                | 0              | -0.095063               | -0.356010 | 1.703946  |
| 3                | 1                | 0              | -1.039378               | -0.497714 | 1.296164  |
| 4                | 1                | 0              | -0.173847               | 0.360238  | 2.427987  |
| 5                | 1                | 0              | 0.212828                | -1.222780 | 2.146873  |
| 6                | 7                | 0              | 0.021446                | 0.728413  | -0.821952 |
| 7                | 6                | 0              | 0.450620                | 2.023735  | -0.243032 |

Supplementary Material (ESI) for Organic & Biomolecular Chemistry  
 This journal is (c) The Royal Society of Chemistry 2009

|    |    |   |           |           |           |
|----|----|---|-----------|-----------|-----------|
| 8  | 1  | 0 | -0.232912 | 2.357723  | 0.542880  |
| 9  | 1  | 0 | 0.595079  | 2.802252  | -0.993886 |
| 10 | 6  | 0 | 1.716094  | 1.285516  | 0.277020  |
| 11 | 1  | 0 | 1.984390  | 1.387635  | 1.327786  |
| 12 | 1  | 0 | 2.593079  | 1.433071  | -0.358951 |
| 13 | 1  | 0 | -0.989964 | 0.390864  | -0.958929 |
| 14 | 17 | 0 | -2.656470 | -0.226392 | -0.214691 |
| 15 | 17 | 0 | 1.422924  | -1.532207 | -0.438524 |

**Transition State for 2-Bromoazetidene:** E = -2801.5372993. TC= 0.138019.  
 Imaginary Frequency = -363.5883.

| Center<br>Number | Atomic<br>Number | Atomic<br>Type | Coordinates (Angstroms) |           |           |
|------------------|------------------|----------------|-------------------------|-----------|-----------|
|                  |                  |                | X                       | Y         | Z         |
| 1                | 6                | 0              | -1.131501               | -0.331148 | 0.034411  |
| 2                | 1                | 0              | -0.570994               | -1.252527 | 0.108113  |
| 3                | 7                | 0              | -2.892423               | -1.314619 | -0.006047 |
| 4                | 1                | 0              | -2.867616               | -1.999773 | -0.763377 |
| 5                | 1                | 0              | -3.619222               | -0.631545 | -0.225069 |
| 6                | 1                | 0              | -3.144768               | -1.801558 | 0.856478  |
| 7                | 7                | 0              | -1.115955               | 0.497104  | -1.023574 |
| 8                | 6                | 0              | -1.073557               | 1.715576  | -0.173866 |
| 9                | 1                | 0              | -1.839001               | 2.456152  | -0.416809 |
| 10               | 1                | 0              | -0.070067               | 2.145840  | -0.169868 |
| 11               | 6                | 0              | -1.312246               | 0.778580  | 1.041517  |
| 12               | 1                | 0              | -2.294634               | 0.848117  | 1.513830  |
| 13               | 1                | 0              | -0.517650               | 0.792601  | 1.787825  |
| 14               | 1                | 0              | -0.488974               | 0.327324  | -1.808669 |
| 15               | 35               | 0              | 1.845011                | -0.232573 | 0.026072  |

**Transition State for 2-Fluorooxetane:** E = -348.1414171. TC= 0.125749.  
 Imaginary Frequency = -484.1120.

| Center<br>Number | Atomic<br>Number | Atomic<br>Type | Coordinates (Angstroms) |           |           |
|------------------|------------------|----------------|-------------------------|-----------|-----------|
|                  |                  |                | X                       | Y         | Z         |
| 1                | 6                | 0              | -0.254337               | -0.439900 | -0.052784 |
| 2                | 1                | 0              | -0.146641               | -1.497884 | -0.239478 |
| 3                | 7                | 0              | -2.105613               | -0.431085 | 0.041681  |
| 4                | 1                | 0              | -2.452683               | -0.786956 | -0.851818 |
| 5                | 1                | 0              | -2.434450               | 0.530493  | 0.146863  |
| 6                | 1                | 0              | -2.488671               | -1.004007 | 0.797806  |
| 7                | 6                | 0              | 0.693505                | 1.329592  | -0.073573 |
| 8                | 1                | 0              | 0.331055                | 2.359258  | -0.114302 |
| 9                | 1                | 0              | 1.754550                | 1.230044  | -0.286745 |
| 10               | 6                | 0              | 0.225955                | 0.424840  | 1.083705  |
| 11               | 1                | 0              | -0.572072               | 0.868325  | 1.689930  |
| 12               | 1                | 0              | 1.004529                | -0.025935 | 1.690778  |
| 13               | 9                | 0              | 1.799801                | -1.154024 | -0.065571 |
| 14               | 8                | 0              | -0.055658               | 0.480410  | -1.034843 |

**Transition State for 2-Chlorooxetane:** E = -708.1705615. TC= 0.125208.  
 Imaginary Frequency = -427.4127.

| Center<br>Number | Atomic<br>Number | Atomic<br>Type | Coordinates (Angstroms) |           |           |
|------------------|------------------|----------------|-------------------------|-----------|-----------|
|                  |                  |                | X                       | Y         | Z         |
| 1                | 6                | 0              | -0.488419               | -0.373558 | -0.048842 |
| 2                | 1                | 0              | -0.099893               | -1.368197 | -0.200958 |

Supplementary Material (ESI) for Organic & Biomolecular Chemistry  
 This journal is (c) The Royal Society of Chemistry 2009

|    |    |   |           |           |           |
|----|----|---|-----------|-----------|-----------|
| 3  | 7  | 0 | -2.366279 | -1.044527 | 0.034679  |
| 4  | 1  | 0 | -2.537171 | -1.557835 | -0.832213 |
| 5  | 1  | 0 | -3.017551 | -0.258465 | 0.064999  |
| 6  | 1  | 0 | -2.564972 | -1.666106 | 0.821527  |
| 7  | 6  | 0 | -0.284278 | 1.621198  | -0.096424 |
| 8  | 1  | 0 | -1.036830 | 2.404945  | -0.194391 |
| 9  | 1  | 0 | 0.730110  | 1.967898  | -0.285383 |
| 10 | 6  | 0 | -0.395031 | 0.622103  | 1.072125  |
| 11 | 1  | 0 | -1.309178 | 0.727895  | 1.662132  |
| 12 | 1  | 0 | 0.482866  | 0.514880  | 1.702970  |
| 13 | 17 | 0 | 2.202315  | -0.513971 | -0.010257 |
| 14 | 8  | 0 | -0.564552 | 0.508215  | -1.046028 |

Data for Strain Energy Calculations at the MP2(Full)/6-31+G(d) Level

Azetidine: See Ref 3a.

**2-Fluoroazetidine:** E = -271.7050876. TC = 0.098725.

| Center<br>Number | Atomic<br>Number | Atomic<br>Type | Coordinates (Angstroms) |           |           |
|------------------|------------------|----------------|-------------------------|-----------|-----------|
|                  |                  |                | X                       | Y         | Z         |
| 1                | 6                | 0              | -1.500000               | -0.056775 | -0.093444 |
| 2                | 6                | 0              | 0.519075                | -0.025843 | 0.394581  |
| 3                | 6                | 0              | -0.454366               | 1.075665  | -0.014796 |
| 4                | 1                | 0              | -2.160740               | -0.088456 | -0.963240 |
| 5                | 1                | 0              | -2.099073               | -0.127816 | 0.823083  |
| 6                | 7                | 0              | -0.370131               | -1.018776 | -0.156493 |
| 7                | 1                | 0              | -0.455690               | -1.903300 | 0.342448  |
| 8                | 9                | 0              | 1.778380                | 0.004115  | -0.220916 |
| 9                | 1                | 0              | -0.623239               | 1.890322  | 0.691012  |
| 10               | 1                | 0              | -0.188623               | 1.468869  | -0.997579 |
| 11               | 1                | 0              | 0.724601                | -0.103498 | 1.469926  |

**(2-Fluoroethyl)methylether:** E = -292.7320218. TC = 0.109923.

| Center<br>Number | Atomic<br>Number | Atomic<br>Type | Coordinates (Angstroms) |           |           |
|------------------|------------------|----------------|-------------------------|-----------|-----------|
|                  |                  |                | X                       | Y         | Z         |
| 1                | 6                | 0              | 1.225185                | 0.507823  | 0.000019  |
| 2                | 1                | 0              | 1.271798                | 1.130115  | 0.895212  |
| 3                | 1                | 0              | 1.271765                | 1.130155  | -0.895147 |
| 4                | 6                | 0              | -0.005885               | -0.368881 | 0.000017  |
| 5                | 1                | 0              | -0.012980               | -1.011113 | -0.892229 |
| 6                | 1                | 0              | -0.013016               | -1.011075 | 0.892290  |
| 7                | 6                | 0              | -2.352925               | -0.190434 | -0.000000 |
| 8                | 1                | 0              | -2.444680               | -0.819774 | 0.894575  |
| 9                | 1                | 0              | -3.140786               | 0.562433  | -0.000040 |
| 10               | 1                | 0              | -2.444666               | -0.819853 | -0.894522 |
| 11               | 8                | 0              | -1.117120               | 0.513463  | -0.000023 |
| 12               | 9                | 0              | 2.361252                | -0.328850 | -0.000019 |

**3-Fluoroazetidine:** E = -271.6905037. TC = 0.098425.

| Center<br>Number | Atomic<br>Number | Atomic<br>Type | Coordinates (Angstroms) |   |   |
|------------------|------------------|----------------|-------------------------|---|---|
|                  |                  |                | X                       | Y | Z |

Supplementary Material (ESI) for Organic & Biomolecular Chemistry  
 This journal is (c) The Royal Society of Chemistry 2009

```

-----
  1          6          0      -0.571130   -0.000012    0.515194
  2          6          0       0.484450    1.051717    0.168503
  3          6          0       0.484481   -1.051719    0.168486
  4          1          0       0.968126   -1.445408    1.073944
  5          1          0       0.150174   -1.878364   -0.464164
  6          7          0       1.256166    0.000021   -0.541888
  7          1          0       2.261163    0.000018   -0.371995
  8          1          0       0.968080    1.445462    1.073944
  9          9          0      -1.628768   -0.000008   -0.408681
 10         1          0      -1.018663   -0.000041    1.510690
 11         1          0       0.150070    1.878340   -0.464174
    
```

**2-Fluoropropylethylamine.** E = -351.2499643. TC = 0.183114.

```

Center      Atomic      Atomic      Coordinates (Angstroms)
Number      Number      Type          X           Y           Z
-----
  1          6          0      -2.544356    1.036653    0.123405
  2          1          0      -2.321518    2.051938   -0.219440
  3          1          0      -2.593954    1.035935    1.215647
  4          1          0      -3.519681    0.743032   -0.271752
  5          6          0      -1.478734    0.081159   -0.354503
  6          1          0      -1.425845    0.037396   -1.446594
  7          6          0      -0.106742    0.346986    0.216920
  8          1          0      -0.175262    0.322780    1.321060
  9          1          0       0.192221    1.359930   -0.074227
 10         6          0       2.180574   -0.508199    0.301720
 11         1          0       2.122381   -0.514198    1.405729
 12         1          0       2.740998   -1.399607    0.001792
 13         6          0       2.925458    0.733874   -0.164436
 14         1          0       3.949355    0.730426    0.222799
 15         1          0       2.963551    0.757744   -1.257013
 16         1          0       2.446102    1.652387    0.185277
 17         7          0       0.854848   -0.610219   -0.313111
 18         1          0       0.483702   -1.546687   -0.149296
 19         9          0      -1.855909   -1.233599    0.057685
    
```

**2,2-Difluoroazetidine:** E = -370.7563719 TC = 0.090825.

```

Center      Atomic      Atomic      Coordinates (Angstroms)
Number      Number      Type          X           Y           Z
-----
  1          6          0       0.677526   -0.659177    0.873149
  2          6          0      -0.394087   -0.046218   -0.012743
  3          6          0       1.663164    0.074312   -0.067893
  4          1          0       0.648172   -0.357103    1.919739
  5          1          0       0.711890   -1.744903    0.775596
  6          1          0       2.016314    1.021812    0.351975
  7          1          0       2.502828   -0.501907   -0.460684
  8          9          0      -0.949474    1.104308    0.550424
  9          7          0       0.545427    0.221029   -1.039645
 10         1          0       0.432395    1.088817   -1.562176
 11         9          0      -1.473771   -0.800688   -0.383980
    
```

**1,1-Difluoro-1-propylethylamine:** E = -450.3099247. TC = 0.175364.

```

Center      Atomic      Coordinates (Angstroms)
Number      Number          X           Y           Z
-----
    
```

Supplementary Material (ESI) for Organic & Biomolecular Chemistry  
 This journal is (c) The Royal Society of Chemistry 2009

|    |   |           |           |           |
|----|---|-----------|-----------|-----------|
| 1  | 1 | -1.471149 | 1.558344  | -0.915412 |
| 2  | 6 | -1.577471 | 0.949853  | -0.009880 |
| 3  | 1 | -1.435703 | 1.608546  | 0.852028  |
| 4  | 6 | -0.439331 | -0.041719 | 0.007993  |
| 5  | 6 | -2.948240 | 0.284406  | 0.027508  |
| 6  | 7 | 0.834552  | 0.550597  | 0.000263  |
| 7  | 9 | -0.612531 | -0.943231 | -1.068561 |
| 8  | 9 | -0.533492 | -0.856570 | 1.123483  |
| 9  | 1 | -3.730579 | 1.048562  | 0.029449  |
| 10 | 1 | -3.062811 | -0.322129 | 0.928701  |
| 11 | 1 | -3.098207 | -0.358185 | -0.842556 |
| 12 | 1 | 0.880878  | 1.258641  | -0.731507 |
| 13 | 6 | 1.984917  | -0.362296 | -0.065237 |
| 14 | 1 | 1.891800  | -1.061788 | 0.768110  |
| 15 | 6 | 3.267996  | 0.441116  | 0.061993  |
| 16 | 1 | 1.985167  | -0.947060 | -0.994512 |
| 17 | 1 | 3.278817  | 0.996897  | 1.002880  |
| 18 | 1 | 3.369013  | 1.155822  | -0.762037 |
| 19 | 1 | 4.137899  | -0.221788 | 0.034466  |

**3,3-Difluoroazetidine:** E = -370.7371284. TC = 0.090739.

| Center<br>Number | Atomic<br>Number | Atomic<br>Type | Coordinates (Angstroms) |           |           |
|------------------|------------------|----------------|-------------------------|-----------|-----------|
|                  |                  |                | X                       | Y         | Z         |
| 1                | 6                | 0              | -0.420399               | -0.014163 | -0.000015 |
| 2                | 6                | 0              | 0.661426                | -0.134160 | 1.066200  |
| 3                | 6                | 0              | 0.661587                | -0.135894 | -1.065900 |
| 4                | 1                | 0              | 0.704930                | -1.161223 | -1.453219 |
| 5                | 1                | 0              | 0.625872                | 0.586343  | -1.884297 |
| 6                | 7                | 0              | 1.653491                | 0.182446  | -0.000133 |
| 7                | 1                | 0              | 2.481842                | -0.411197 | 0.000440  |
| 8                | 9                | 0              | -1.397212               | -0.978345 | 0.000728  |
| 9                | 1                | 0              | 0.704803                | -1.158878 | 1.455139  |
| 10               | 1                | 0              | 0.625576                | 0.589426  | 1.883408  |
| 11               | 9                | 0              | -1.062026               | 1.198757  | -0.000978 |

**trans-2,3-Difluoroazetidine:** E = -370.7364727. TC = 0.091433.

| Center<br>Number | Atomic<br>Number | Atomic<br>Type | Coordinates (Angstroms) |           |           |
|------------------|------------------|----------------|-------------------------|-----------|-----------|
|                  |                  |                | X                       | Y         | Z         |
| 1                | 6                | 0              | -0.662806               | -0.258109 | 0.383393  |
| 2                | 6                | 0              | 0.670672                | -0.187921 | -0.346784 |
| 3                | 6                | 0              | -0.754259               | 1.252768  | 0.142664  |
| 4                | 1                | 0              | -0.563600               | -0.557903 | 1.427785  |
| 5                | 1                | 0              | -1.337232               | 1.455427  | -0.764000 |
| 6                | 1                | 0              | -1.090946               | 1.892179  | 0.961305  |
| 7                | 7                | 0              | 0.718829                | 1.226898  | -0.052004 |
| 8                | 1                | 0              | 1.121091                | 1.838677  | -0.760026 |
| 9                | 9                | 0              | 1.725139                | -0.916119 | 0.200364  |
| 10               | 9                | 0              | -1.646261               | -1.037529 | -0.219559 |
| 11               | 1                | 0              | 0.607337                | -0.474265 | -1.403924 |

Supplementary Material (ESI) for Organic & Biomolecular Chemistry  
 This journal is (c) The Royal Society of Chemistry 2009

**(R,S)-(1,2-Difluoropropyl)ethylamine (anti conformation):** E = -  
 450.2926588. TC = 0.175940.

| Center<br>Number | Atomic<br>Number | Coordinates (Angstroms) |           |           |
|------------------|------------------|-------------------------|-----------|-----------|
|                  |                  | X                       | Y         | Z         |
| 1                | 6                | 0.386426                | 0.568389  | 0.532854  |
| 2                | 7                | -0.949288               | 0.181412  | 0.685041  |
| 3                | 6                | 1.238230                | -0.394750 | -0.281420 |
| 4                | 1                | 0.826749                | 0.768936  | 1.513113  |
| 5                | 9                | 0.525743                | 1.823864  | -0.193803 |
| 6                | 1                | -1.444030               | 0.819110  | 1.306182  |
| 7                | 1                | 0.864002                | -0.427029 | -1.308651 |
| 8                | 6                | 2.708323                | -0.056386 | -0.247191 |
| 9                | 6                | -1.731604               | -0.122940 | -0.516098 |
| 10               | 9                | 1.064172                | -1.689188 | 0.256137  |
| 11               | 6                | -3.182749               | -0.350478 | -0.127520 |
| 12               | 1                | -1.327089               | -1.037748 | -0.958085 |
| 13               | 1                | -1.660647               | 0.680487  | -1.262836 |
| 14               | 1                | 3.074759                | -0.074905 | 0.783187  |
| 15               | 1                | 2.875592                | 0.937602  | -0.668207 |
| 16               | 1                | 3.269768                | -0.789776 | -0.830689 |
| 17               | 1                | -3.620414               | 0.555836  | 0.304840  |
| 18               | 1                | -3.257768               | -1.157390 | 0.606340  |
| 19               | 1                | -3.776887               | -0.620117 | -1.005236 |

**cis-2,3-Difluoroazetidide:** E = -370.7296382. TC = 0.091361.

| Center<br>Number | Atomic<br>Number | Atomic<br>Type | Coordinates (Angstroms) |           |           |
|------------------|------------------|----------------|-------------------------|-----------|-----------|
|                  |                  |                | X                       | Y         | Z         |
| 1                | 6                | 0              | -0.588910               | 0.494270  | 0.527014  |
| 2                | 6                | 0              | 0.687653                | -0.360151 | 0.421727  |
| 3                | 6                | 0              | -1.322743               | -0.722433 | -0.047191 |
| 4                | 1                | 0              | -1.851262               | -1.293220 | 0.726741  |
| 5                | 1                | 0              | -1.993312               | -0.516491 | -0.885041 |
| 6                | 7                | 0              | -0.004212               | -1.273818 | -0.449574 |
| 7                | 1                | 0              | 0.171547                | -2.270078 | -0.335029 |
| 8                | 1                | 0              | 1.037951                | -0.765639 | 1.380152  |
| 9                | 9                | 0              | -0.577472               | 1.567627  | -0.356521 |
| 10               | 9                | 0              | 1.786566                | 0.256873  | -0.161260 |
| 11               | 1                | 0              | -0.873283               | 0.871539  | 1.510921  |

**(R,S)-1-(1,2-Difluoropropyl)ethylamine (syn conformation):** E = -  
 450.2945662. TC = 0.175969.

| Center<br>Number | Atomic<br>Number | Coordinates (Angstroms) |           |           |
|------------------|------------------|-------------------------|-----------|-----------|
|                  |                  | X                       | Y         | Z         |
| 1                | 1                | 3.348184                | 1.218187  | 0.688024  |
| 2                | 6                | 3.362982                | 0.509944  | -0.147219 |
| 3                | 1                | 3.338338                | 1.077660  | -1.080818 |
| 4                | 6                | 2.181719                | -0.441853 | -0.072961 |
| 5                | 1                | 4.305559                | -0.043050 | -0.095706 |
| 6                | 7                | 0.926277                | 0.310529  | -0.185902 |
| 7                | 1                | 2.220223                | -1.030235 | 0.853981  |
| 8                | 1                | 2.211129                | -1.145627 | -0.911504 |
| 9                | 6                | -0.246341               | -0.472631 | -0.219675 |
| 10               | 1                | 0.868510                | 1.018457  | 0.546347  |



Supplementary Material (ESI) for Organic & Biomolecular Chemistry  
 This journal is (c) The Royal Society of Chemistry 2009

|    |   |           |           |           |
|----|---|-----------|-----------|-----------|
| 11 | 6 | -1.480618 | 0.365322  | -0.494048 |
| 12 | 9 | -0.466055 | -1.170729 | 1.015823  |
| 13 | 1 | -0.150374 | -1.260125 | -0.972240 |
| 14 | 1 | -1.339717 | 0.874602  | -1.452041 |
| 15 | 6 | -1.854320 | 1.329336  | 0.606166  |
| 16 | 9 | -2.556348 | -0.534621 | -0.674625 |
| 17 | 1 | -2.799289 | 1.815121  | 0.352019  |
| 18 | 1 | -1.095387 | 2.110308  | 0.716128  |
| 19 | 1 | -1.970031 | 0.798440  | 1.552762  |

**trans-2,3-Difluoroazetidione:** E = -370.7364727. TC = 0.091433.

| Center<br>Number | Atomic<br>Number | Atomic<br>Type | Coordinates (Angstroms) |           |           |
|------------------|------------------|----------------|-------------------------|-----------|-----------|
|                  |                  |                | X                       | Y         | Z         |
| 1                | 6                | 0              | -0.662806               | -0.258109 | 0.383393  |
| 2                | 6                | 0              | 0.670672                | -0.187921 | -0.346784 |
| 3                | 6                | 0              | -0.754259               | 1.252768  | 0.142664  |
| 4                | 1                | 0              | -0.563600               | -0.557903 | 1.427785  |
| 5                | 1                | 0              | -1.337232               | 1.455427  | -0.764000 |
| 6                | 1                | 0              | -1.090946               | 1.892179  | 0.961305  |
| 7                | 7                | 0              | 0.718829                | 1.226898  | -0.052004 |
| 8                | 1                | 0              | 1.121091                | 1.838677  | -0.760026 |
| 9                | 9                | 0              | 1.725139                | -0.916119 | 0.200364  |
| 10               | 9                | 0              | -1.646261               | -1.037529 | -0.219559 |
| 11               | 1                | 0              | 0.607337                | -0.474265 | -1.403924 |

**cis-2,3-Difluoroazetidione:** E = -370.7364727. TC = 0.091433.

| Center<br>Number | Atomic<br>Number | Atomic<br>Type | Coordinates (Angstroms) |           |           |
|------------------|------------------|----------------|-------------------------|-----------|-----------|
|                  |                  |                | X                       | Y         | Z         |
| 1                | 6                | 0              | -0.662806               | -0.258109 | 0.383393  |
| 2                | 6                | 0              | 0.670672                | -0.187921 | -0.346784 |
| 3                | 6                | 0              | -0.754259               | 1.252768  | 0.142664  |
| 4                | 1                | 0              | -0.563600               | -0.557903 | 1.427785  |
| 5                | 1                | 0              | -1.337232               | 1.455427  | -0.764000 |
| 6                | 1                | 0              | -1.090946               | 1.892179  | 0.961305  |
| 7                | 7                | 0              | 0.718829                | 1.226898  | -0.052004 |
| 8                | 1                | 0              | 1.121091                | 1.838677  | -0.760026 |
| 9                | 9                | 0              | 1.725139                | -0.916119 | 0.200364  |
| 10               | 9                | 0              | -1.646261               | -1.037529 | -0.219559 |
| 11               | 1                | 0              | 0.607337                | -0.474265 | -1.403924 |

**(R,S)-1-(1,2-Difluoropropyl)ethylamine (anti conformation):** E = -450.2926588. TC = 0.175940.

| Center<br>Number | Atomic<br>Number | Coordinates (Angstroms) |           |           |
|------------------|------------------|-------------------------|-----------|-----------|
|                  |                  | X                       | Y         | Z         |
| 1                | 6                | 0.386426                | 0.568389  | 0.532854  |
| 2                | 7                | -0.949288               | 0.181412  | 0.685041  |
| 3                | 6                | 1.238230                | -0.394750 | -0.281420 |
| 4                | 1                | 0.826749                | 0.768936  | 1.513113  |
| 5                | 9                | 0.525743                | 1.823864  | -0.193803 |
| 6                | 1                | -1.444030               | 0.819110  | 1.306182  |
| 7                | 1                | 0.864002                | -0.427029 | -1.308651 |
| 8                | 6                | 2.708323                | -0.056386 | -0.247191 |

Supplementary Material (ESI) for Organic & Biomolecular Chemistry  
 This journal is (c) The Royal Society of Chemistry 2009

|    |   |           |           |           |
|----|---|-----------|-----------|-----------|
| 9  | 6 | -1.731604 | -0.122940 | -0.516098 |
| 10 | 9 | 1.064172  | -1.689188 | 0.256137  |
| 11 | 6 | -3.182749 | -0.350478 | -0.127520 |
| 12 | 1 | -1.327089 | -1.037748 | -0.958085 |
| 13 | 1 | -1.660647 | 0.680487  | -1.262836 |
| 14 | 1 | 3.074759  | -0.074905 | 0.783187  |
| 15 | 1 | 2.875592  | 0.937602  | -0.668207 |
| 16 | 1 | 3.269768  | -0.789776 | -0.830689 |
| 17 | 1 | -3.620414 | 0.555836  | 0.304840  |
| 18 | 1 | -3.257768 | -1.157390 | 0.606340  |
| 19 | 1 | -3.776887 | -0.620117 | -1.005236 |

**cis-2,4-Difluoroazetidione:** E = -370.7493441. TC = 0.091230.

| Center Number | Atomic Number | Atomic Type | Coordinates (Angstroms) |           |           |
|---------------|---------------|-------------|-------------------------|-----------|-----------|
|               |               |             | X                       | Y         | Z         |
| 1             | 6             | 0           | -1.039064               | -0.014168 | 0.385284  |
| 2             | 1             | 0           | -1.583285               | -0.059798 | 1.333529  |
| 3             | 6             | 0           | -0.000025               | 1.101014  | 0.238918  |
| 4             | 6             | 0           | 1.039103                | -0.014150 | 0.385317  |
| 5             | 7             | 0           | 0.000015                | -0.988138 | 0.194826  |
| 6             | 1             | 0           | -0.000044               | -1.882258 | 0.678614  |
| 7             | 1             | 0           | -0.000047               | 1.892679  | 0.989385  |
| 8             | 1             | 0           | -0.000001               | 1.519032  | -0.768998 |
| 9             | 9             | 0           | -2.025209               | -0.051620 | -0.610375 |
| 10            | 9             | 0           | 2.025187                | -0.051612 | -0.610405 |
| 11            | 1             | 0           | 1.583394                | -0.059789 | 1.333589  |

**trans-2,4-Difluoroazetidione:** E = -370.7503172. TC = 0.091263.

| Center Number | Atomic Number | Atomic Type | Coordinates (Angstroms) |           |           |
|---------------|---------------|-------------|-------------------------|-----------|-----------|
|               |               |             | X                       | Y         | Z         |
| 1             | 6             | 0           | 0.837964                | -0.043648 | -0.413122 |
| 2             | 1             | 0           | 0.833491                | -0.166844 | -1.500167 |
| 3             | 6             | 0           | 0.000646                | 1.107306  | 0.160575  |
| 4             | 6             | 0           | -1.002474               | 0.012201  | 0.529810  |
| 5             | 7             | 0           | 0.028783                | -0.965768 | 0.347851  |
| 6             | 1             | 0           | -0.196092               | -1.897351 | 0.003512  |
| 7             | 1             | 0           | -1.544861               | -0.003037 | 1.476011  |
| 8             | 9             | 0           | -2.008918               | -0.065072 | -0.477228 |
| 9             | 1             | 0           | -0.365140               | 1.867951  | -0.529417 |
| 10            | 1             | 0           | 0.494914                | 1.557498  | 1.023255  |
| 11            | 9             | 0           | 2.182184                | -0.051927 | -0.030741 |

**bis-(1-Fluoroethyl)amine:** E = -411.1332255. TC = 0.145134.

| Center Number | Atomic Number | Atomic Type | Coordinates (Angstroms) |           |           |
|---------------|---------------|-------------|-------------------------|-----------|-----------|
|               |               |             | X                       | Y         | Z         |
| 1             | 6             | 0           | 2.393419                | -0.641828 | 0.575699  |
| 2             | 1             | 0           | 2.245210                | -1.687784 | 0.854015  |
| 3             | 1             | 0           | 2.480175                | -0.036500 | 1.483053  |
| 4             | 1             | 0           | 3.320294                | -0.544553 | 0.007691  |
| 5             | 6             | 0           | 1.229567                | -0.162041 | -0.252015 |
| 6             | 1             | 0           | 1.113661                | -0.721566 | -1.183002 |
| 7             | 7             | 0           | 0.015361                | -0.179550 | 0.459044  |
| 8             | 6             | 0           | -1.202048               | 0.058912  | -0.229840 |
| 9             | 1             | 0           | -1.016923               | 0.520892  | -1.203651 |

Supplementary Material (ESI) for Organic & Biomolecular Chemistry  
 This journal is (c) The Royal Society of Chemistry 2009

|    |   |   |           |           |           |
|----|---|---|-----------|-----------|-----------|
| 10 | 6 | 0 | -2.191446 | 0.841387  | 0.596185  |
| 11 | 1 | 0 | -1.815095 | 1.852378  | 0.776072  |
| 12 | 1 | 0 | -3.146903 | 0.904791  | 0.072641  |
| 13 | 1 | 0 | -2.354428 | 0.335908  | 1.552730  |
| 14 | 9 | 0 | 1.546646  | 1.181539  | -0.686230 |
| 15 | 9 | 0 | -1.810556 | -1.195637 | -0.549268 |
| 16 | 1 | 0 | 0.064720  | 0.181576  | 1.406449  |

**bis-(1-Fluoroethyl)amine** (gauche conformation): E = -411.1342946.

TC = 0.145269

| Center<br>Number | Atomic<br>Number | Atomic<br>Type | Coordinates (Angstroms) |           |           |
|------------------|------------------|----------------|-------------------------|-----------|-----------|
|                  |                  |                | X                       | Y         | Z         |
| 1                | 1                | 0              | -2.315498               | -1.908275 | 0.311046  |
| 2                | 6                | 0              | -2.404354               | -0.896951 | -0.092076 |
| 3                | 1                | 0              | -2.441819               | -0.947637 | -1.184292 |
| 4                | 6                | 0              | -1.225437               | -0.060161 | 0.340270  |
| 5                | 1                | 0              | -3.332019               | -0.443554 | 0.262446  |
| 6                | 7                | 0              | -0.000011               | -0.583226 | -0.145586 |
| 7                | 1                | 0              | -1.157284               | 0.038751  | 1.427276  |
| 8                | 9                | 0              | -1.465395               | 1.267328  | -0.134927 |
| 9                | 6                | 0              | 1.225339                | -0.059616 | 0.340002  |
| 10               | 1                | 0              | -0.000057               | -0.723483 | -1.155070 |
| 11               | 6                | 0              | 2.404348                | -0.897124 | -0.090712 |
| 12               | 1                | 0              | 1.156752                | 0.040845  | 1.426840  |
| 13               | 9                | 0              | 1.465538                | 1.267078  | -0.137131 |
| 14               | 1                | 0              | 2.442016                | -0.949664 | -1.182833 |
| 15               | 1                | 0              | 2.315356                | -1.907773 | 0.314063  |
| 16               | 1                | 0              | 3.331966                | -0.443173 | 0.263240  |

**2-Chloroazetidine:** E = -631.7109146. TC = -631.7109146.

| Center<br>Number | Atomic<br>Number | Atomic<br>Type | Coordinates (Angstroms) |           |           |
|------------------|------------------|----------------|-------------------------|-----------|-----------|
|                  |                  |                | X                       | Y         | Z         |
| 1                | 6                | 0              | -1.930492               | -0.059882 | -0.127503 |
| 2                | 6                | 0              | 0.056325                | -0.020938 | 0.456631  |
| 3                | 6                | 0              | -0.890910               | 1.075230  | -0.035338 |
| 4                | 1                | 0              | -2.578465               | -0.095825 | -1.006683 |
| 5                | 1                | 0              | -2.539640               | -0.131346 | 0.783575  |
| 6                | 7                | 0              | -0.795390               | -1.017986 | -0.173136 |
| 7                | 1                | 0              | -0.897498               | -1.904382 | 0.322526  |
| 8                | 1                | 0              | -1.083783               | 1.909453  | 0.641213  |
| 9                | 1                | 0              | -0.595902               | 1.439887  | -1.020729 |
| 10               | 1                | 0              | 0.111055                | -0.081111 | 1.550216  |
| 11               | 17               | 0              | 1.749555                | 0.001339  | -0.107112 |

**1-(1-Chloroethyl)methylamine:** E = -632.9204556. TC = 0.121393.

| Center<br>Number | Atomic<br>Number | Atomic<br>Type | Coordinates (Angstroms) |          |           |
|------------------|------------------|----------------|-------------------------|----------|-----------|
|                  |                  |                | X                       | Y        | Z         |
| 1                | 6                | 0              | -1.162427               | 1.546051 | -0.017768 |
| 2                | 1                | 0              | -1.330662               | 1.553630 | -1.098716 |
| 3                | 1                | 0              | -0.758577               | 2.515369 | 0.286882  |

Supplementary Material (ESI) for Organic & Biomolecular Chemistry  
 This journal is (c) The Royal Society of Chemistry 2009

|    |    |   |           |           |           |
|----|----|---|-----------|-----------|-----------|
| 4  | 1  | 0 | -2.122455 | 1.381314  | 0.474740  |
| 5  | 6  | 0 | -0.174345 | 0.463873  | 0.354751  |
| 6  | 1  | 0 | -0.029904 | 0.396326  | 1.434859  |
| 7  | 6  | 0 | 2.132372  | -0.287437 | 0.089314  |
| 8  | 1  | 0 | 1.902188  | -1.318878 | -0.206604 |
| 9  | 1  | 0 | 3.061566  | 0.027652  | -0.389506 |
| 10 | 1  | 0 | 2.278785  | -0.259158 | 1.172225  |
| 11 | 17 | 0 | -0.959033 | -1.175973 | -0.065285 |
| 12 | 7  | 0 | 1.078672  | 0.658893  | -0.263919 |
| 13 | 1  | 0 | 0.978323  | 0.748110  | -1.274382 |

**3-Chloroazetidione:** E = -631.7020306. TC = 0.097572.

| Center Number | Atomic Number | Atomic Type | Coordinates (Angstroms) |           |           |
|---------------|---------------|-------------|-------------------------|-----------|-----------|
|               |               |             | X                       | Y         | Z         |
| 1             | 6             | 0           | -0.920702               | 1.048171  | 0.165056  |
| 2             | 6             | 0           | 0.080981                | 0.000000  | 0.676754  |
| 3             | 6             | 0           | -0.920702               | -1.048171 | 0.165056  |
| 4             | 1             | 0           | -1.564029               | 1.394587  | 0.988122  |
| 5             | 1             | 0           | -0.520200               | 1.907773  | -0.378641 |
| 6             | 1             | 0           | -1.564029               | -1.394587 | 0.988122  |
| 7             | 1             | 0           | -0.520200               | -1.907773 | -0.378641 |
| 8             | 7             | 0           | -1.526787               | 0.000000  | -0.689008 |
| 9             | 1             | 0           | -2.545462               | -0.000000 | -0.736854 |
| 10            | 17            | 0           | 1.626388                | -0.000000 | -0.202423 |
| 11            | 1             | 0           | 0.315371                | 0.000000  | 1.740937  |

**2-Chloropropylmethylamine:** E = -671.6519250. TC = 0.150376.

| Center Number | Atomic Number | Atomic Type | Coordinates (Angstroms) |           |           |
|---------------|---------------|-------------|-------------------------|-----------|-----------|
|               |               |             | X                       | Y         | Z         |
| 1             | 6             | 0           | -1.772115               | 1.542676  | 0.062038  |
| 2             | 1             | 0           | -1.433346               | 2.537457  | -0.266754 |
| 3             | 1             | 0           | -1.872827               | 1.547269  | 1.156000  |
| 4             | 1             | 0           | -2.758594               | 1.348406  | -0.376305 |
| 5             | 6             | 0           | -0.754345               | 0.494849  | -0.387773 |
| 6             | 1             | 0           | -0.664610               | 0.435475  | -1.476770 |
| 7             | 6             | 0           | 0.628884                | 0.666410  | 0.235994  |
| 8             | 1             | 0           | 0.548741                | 0.589095  | 1.340877  |
| 9             | 1             | 0           | 0.970527                | 1.688045  | -0.001097 |
| 10            | 6             | 0           | 3.011333                | -0.039169 | 0.102079  |
| 11            | 1             | 0           | 3.136440                | -0.083078 | 1.201752  |
| 12            | 1             | 0           | 3.655930                | -0.797575 | -0.357377 |
| 13            | 1             | 0           | 3.338756                | 0.949366  | -0.246220 |
| 14            | 17            | 0           | -1.425557               | -1.241127 | 0.093159  |
| 15            | 7             | 0           | 1.615223                | -0.266512 | -0.343505 |
| 16            | 1             | 0           | 1.324346                | -1.238305 | -0.227300 |

**2,2-Dichloroazetidione:** E = -1090.7582015. TC = 0.088658.

| Center Number | Atomic Number | Atomic Type | Coordinates (Angstroms) |           |           |
|---------------|---------------|-------------|-------------------------|-----------|-----------|
|               |               |             | X                       | Y         | Z         |
| 1             | 6             | 0           | 0.027877                | -0.127107 | -0.000756 |
| 2             | 6             | 0           | -1.998212               | -0.550786 | -0.089110 |
| 3             | 6             | 0           | -0.972789               | -0.590570 | 1.063925  |
| 4             | 1             | 0           | -2.681942               | -1.396639 | -0.187231 |
| 5             | 7             | 0           | -0.846932               | -0.607187 | -1.022753 |

Supplementary Material (ESI) for Organic & Biomolecular Chemistry  
 This journal is (c) The Royal Society of Chemistry 2009

|    |    |   |           |           |           |
|----|----|---|-----------|-----------|-----------|
| 6  | 1  | 0 | -0.875187 | -0.096767 | -1.905863 |
| 7  | 1  | 0 | -0.753433 | -1.610048 | 1.386104  |
| 8  | 17 | 0 | 0.200542  | 1.681283  | 0.023862  |
| 9  | 17 | 0 | 1.656409  | -0.828220 | -0.010589 |
| 10 | 1  | 0 | -1.117667 | 0.068307  | 1.919511  |
| 11 | 1  | 0 | -2.552674 | 0.394154  | -0.123245 |

**1-(1,1-Dichloroethyl)methyl amine:** E = -1091.9602822. TC = 0.112383.

| Center<br>Number | Atomic<br>Number | Atomic<br>Type | Coordinates (Angstroms) |           |           |
|------------------|------------------|----------------|-------------------------|-----------|-----------|
|                  |                  |                | X                       | Y         | Z         |
| 1                | 6                | 0              | -0.077398               | -0.327475 | 1.662891  |
| 2                | 1                | 0              | -0.027513               | -1.394477 | 1.894701  |
| 3                | 1                | 0              | -1.032567               | 0.080336  | 1.999206  |
| 4                | 1                | 0              | 0.722974                | 0.197920  | 2.185004  |
| 5                | 6                | 0              | 0.077184                | -0.149638 | 0.167582  |
| 6                | 6                | 0              | -2.273285               | -0.661416 | -0.312768 |
| 7                | 1                | 0              | -2.845724               | -1.212450 | -1.060883 |
| 8                | 1                | 0              | -2.541078               | -1.056341 | 0.668299  |
| 9                | 1                | 0              | -2.546287               | 0.400623  | -0.365067 |
| 10               | 7                | 0              | -0.854814               | -0.903528 | -0.579364 |
| 11               | 1                | 0              | -0.647915               | -0.834483 | -1.574893 |
| 12               | 17               | 0              | 1.709016                | -0.668206 | -0.339481 |
| 13               | 17               | 0              | -0.030027               | 1.666720  | -0.177993 |

**trans-2,3-Dichloroazetidine:** E = -1090.7546304. TC = 0.089330.

| Center<br>Number | Atomic<br>Number | Atomic<br>Type | Coordinates (Angstroms) |           |           |
|------------------|------------------|----------------|-------------------------|-----------|-----------|
|                  |                  |                | X                       | Y         | Z         |
| 1                | 6                | 0              | 0.323460                | 1.394221  | 0.605126  |
| 2                | 6                | 0              | -0.527322               | -0.113378 | -0.575161 |
| 3                | 6                | 0              | 0.558525                | -0.127327 | 0.515553  |
| 4                | 1                | 0              | 1.211188                | 2.030070  | 0.623167  |
| 5                | 1                | 0              | -0.348056               | 1.649602  | 1.435083  |
| 6                | 1                | 0              | -0.407946               | -0.720180 | -1.473164 |
| 7                | 1                | 0              | 0.353559                | -0.729701 | 1.398738  |
| 8                | 7                | 0              | -0.333016               | 1.304263  | -0.716565 |
| 9                | 1                | 0              | -1.143433               | 1.887973  | -0.918438 |
| 10               | 17               | 0              | -2.126069               | -0.606378 | 0.140818  |
| 11               | 17               | 0              | 2.157706                | -0.580016 | -0.100968 |

**(R,S)-1-(1,2-Dichloropropyl)methylamine (anti  
 conformation):** E = -1131.1315863. TC = 0.143268.

| Center<br>Number | Atomic<br>Number | Atomic<br>Type | Coordinates (Angstroms) |           |           |
|------------------|------------------|----------------|-------------------------|-----------|-----------|
|                  |                  |                | X                       | Y         | Z         |
| 1                | 6                | 0              | -0.942905               | 0.402152  | -0.334901 |
| 2                | 1                | 0              | -0.868551               | 0.461753  | -1.424144 |
| 3                | 6                | 0              | 0.425966                | 0.015907  | 0.218158  |
| 4                | 1                | 0              | 0.374735                | -0.061665 | 1.316317  |
| 5                | 6                | 0              | 2.089177                | -1.754720 | 0.259899  |
| 6                | 1                | 0              | 1.895360                | -1.966704 | 1.323302  |
| 7                | 1                | 0              | 2.346265                | -2.686992 | -0.246548 |
| 8                | 1                | 0              | 2.944114                | -1.080049 | 0.188728  |
| 9                | 6                | 0              | -1.523676               | 1.673913  | 0.252804  |
| 10               | 1                | 0              | -0.913282               | 2.533590  | -0.028298 |
| 11               | 1                | 0              | -2.537784               | 1.826277  | -0.122988 |

Supplementary Material (ESI) for Organic & Biomolecular Chemistry  
 This journal is (c) The Royal Society of Chemistry 2009

|    |    |   |           |           |           |
|----|----|---|-----------|-----------|-----------|
| 12 | 1  | 0 | -1.566107 | 1.610559  | 1.344150  |
| 13 | 17 | 0 | -2.078263 | -0.957406 | 0.016240  |
| 14 | 17 | 0 | 1.562891  | 1.385200  | -0.089693 |
| 15 | 7  | 0 | 0.943330  | -1.156504 | -0.422650 |
| 16 | 1  | 0 | 0.191900  | -1.837254 | -0.519028 |

**cis-2,3-Dichloroazetidine:** E = -1090.7544565. TC = 0.089393.

| Center<br>Number | Atomic<br>Number | Atomic<br>Type | Coordinates (Angstroms) |           |           |
|------------------|------------------|----------------|-------------------------|-----------|-----------|
|                  |                  |                | X                       | Y         | Z         |
| 1                | 6                | 0              | -0.046990               | 1.547087  | -0.650329 |
| 2                | 6                | 0              | 0.780944                | 0.189574  | 0.719136  |
| 3                | 6                | 0              | -0.667467               | 0.638144  | 0.419646  |
| 4                | 1                | 0              | -0.444755               | 2.559972  | -0.748227 |
| 5                | 1                | 0              | -0.007261               | 1.050732  | -1.627122 |
| 6                | 1                | 0              | 1.080904                | 0.004806  | 1.751096  |
| 7                | 7                | 0              | 1.204998                | 1.445095  | 0.138220  |
| 8                | 1                | 0              | 2.094506                | 1.451648  | -0.361209 |
| 9                | 17               | 0              | 1.280631                | -1.274848 | -0.205834 |
| 10               | 17               | 0              | -1.898854               | -0.527967 | -0.039821 |
| 11               | 1                | 0              | -1.047517               | 1.216202  | 1.263333  |

**1-(1,2-Dichloropropyl)methylamine** (gauche conformation): E = -  
 1131.1383529. TC = 0.143502.

| Center<br>Number | Atomic<br>Number | Atomic<br>Type | Coordinates (Angstroms) |           |           |
|------------------|------------------|----------------|-------------------------|-----------|-----------|
|                  |                  |                | X                       | Y         | Z         |
| 1                | 6                | 0              | -1.855054               | 0.988952  | 1.045343  |
| 2                | 1                | 0              | -1.910604               | 1.682327  | 0.205006  |
| 3                | 1                | 0              | -1.450950               | 1.520179  | 1.914091  |
| 4                | 1                | 0              | -2.864223               | 0.647120  | 1.286972  |
| 5                | 6                | 0              | -0.971151               | -0.198414 | 0.721487  |
| 6                | 1                | 0              | -0.998928               | -0.928296 | 1.535665  |
| 7                | 6                | 0              | 0.503359                | 0.142262  | 0.543100  |
| 8                | 1                | 0              | 0.848124                | 0.635682  | 1.457128  |
| 9                | 6                | 0              | 2.733490                | -0.808008 | 0.321755  |
| 10               | 1                | 0              | 3.029125                | -0.381376 | 1.284050  |
| 11               | 1                | 0              | 3.217487                | -1.780694 | 0.215796  |
| 12               | 1                | 0              | 3.078859                | -0.142109 | -0.479153 |
| 13               | 7                | 0              | 1.287113                | -1.007393 | 0.318606  |
| 14               | 1                | 0              | 0.974443                | -1.504844 | -0.514511 |
| 15               | 17               | 0              | 0.701128                | 1.449672  | -0.750695 |
| 16               | 17               | 0              | -1.606833               | -1.064083 | -0.715505 |

**2-Bromoazetidine:** E = -2742.1397124. TC = 0.097317.

| Center<br>Number | Atomic<br>Number | Atomic<br>Type | Coordinates (Angstroms) |           |           |
|------------------|------------------|----------------|-------------------------|-----------|-----------|
|                  |                  |                | X                       | Y         | Z         |
| 1                | 6                | 0              | -0.564173               | 0.018872  | 0.789113  |
| 2                | 6                | 0              | -1.997777               | -0.108718 | -0.713373 |
| 3                | 6                | 0              | -1.467181               | 1.069403  | 0.136281  |
| 4                | 1                | 0              | -3.077983               | -0.193984 | -0.854600 |
| 5                | 7                | 0              | -1.450507               | -1.005873 | 0.330170  |
| 6                | 1                | 0              | -1.069368               | -1.916247 | 0.075835  |
| 7                | 1                | 0              | -2.216662               | 1.437553  | 0.842037  |
| 8                | 1                | 0              | -0.983733               | 1.900088  | -0.376732 |
| 9                | 1                | 0              | -1.482806               | -0.187926 | -1.678603 |

Supplementary Material (ESI) for Organic & Biomolecular Chemistry  
 This journal is (c) The Royal Society of Chemistry 2009

|    |    |   |           |          |           |
|----|----|---|-----------|----------|-----------|
| 10 | 35 | 0 | 1.242275  | 0.002418 | -0.098355 |
| 11 | 1  | 0 | -0.320735 | 0.039651 | 1.851173  |

**1-Bromoethylmethylamine:** E = -2743.3478932. TC = 0.121035.

| Center<br>Number | Atomic<br>Number | Atomic<br>Type | Coordinates (Angstroms) |           |           |
|------------------|------------------|----------------|-------------------------|-----------|-----------|
|                  |                  |                | X                       | Y         | Z         |
| 1                | 6                | 0              | 0.368443                | 2.090944  | -0.032759 |
| 2                | 1                | 0              | 0.188822                | 2.153097  | -1.109786 |
| 3                | 1                | 0              | 1.253897                | 2.683876  | 0.217592  |
| 4                | 1                | 0              | -0.501340               | 2.502504  | 0.481938  |
| 5                | 6                | 0              | 0.609226                | 0.657758  | 0.378330  |
| 6                | 1                | 0              | 0.690174                | 0.521727  | 1.457664  |
| 7                | 6                | 0              | 2.057573                | -1.279350 | 0.081156  |
| 8                | 1                | 0              | 1.274058                | -1.991756 | -0.207308 |
| 9                | 1                | 0              | 2.995489                | -1.545548 | -0.409915 |
| 10               | 1                | 0              | 2.204340                | -1.339346 | 1.162396  |
| 11               | 7                | 0              | 1.714365                | 0.093989  | -0.268346 |
| 12               | 1                | 0              | 1.667515                | 0.230895  | -1.277111 |
| 13               | 35               | 0              | -1.142427               | -0.362557 | -0.028497 |

**2,2-Dibromoazetidine :** E = -5311.6130424. TC = 0.087847.

| Center<br>Number | Atomic<br>Number | Atomic<br>Type | Coordinates (Angstroms) |           |           |
|------------------|------------------|----------------|-------------------------|-----------|-----------|
|                  |                  |                | X                       | Y         | Z         |
| 1                | 6                | 0              | 0.012613                | 0.490929  | -0.008706 |
| 2                | 6                | 0              | 1.134295                | 2.219430  | -0.083450 |
| 3                | 6                | 0              | 0.386471                | 1.508311  | 1.068393  |
| 4                | 1                | 0              | 1.018927                | 3.302163  | -0.169689 |
| 5                | 7                | 0              | 0.272342                | 1.453560  | -1.019063 |
| 6                | 1                | 0              | 0.627925                | 1.133473  | -1.919974 |
| 7                | 1                | 0              | -0.490229               | 2.071111  | 1.395870  |
| 8                | 1                | 0              | 0.958815                | 1.139352  | 1.918462  |
| 9                | 1                | 0              | 2.192704                | 1.937905  | -0.128838 |
| 10               | 35               | 0              | -1.766656               | -0.276774 | -0.002779 |
| 11               | 35               | 0              | 1.326233                | -1.010967 | 0.007927  |

**2,2-Dibromoethylmethylamine:** E = -5312.8192635. TC = 0.111391.

| Center<br>Number | Atomic<br>Number | Atomic<br>Type | Coordinates (Angstroms) |           |           |
|------------------|------------------|----------------|-------------------------|-----------|-----------|
|                  |                  |                | X                       | Y         | Z         |
| 1                | 6                | 0              | 0.006674                | -0.302599 | 2.050451  |
| 2                | 1                | 0              | -0.899988               | -0.001435 | 2.582547  |
| 3                | 1                | 0              | 0.889480                | 0.087393  | 2.567869  |
| 4                | 1                | 0              | 0.071957                | -1.390681 | 2.021794  |
| 5                | 6                | 0              | -0.044548               | 0.258534  | 0.648186  |
| 6                | 6                | 0              | -0.134983               | 2.362235  | -0.636088 |
| 7                | 1                | 0              | -1.039621               | 2.108558  | -1.188880 |
| 8                | 1                | 0              | -0.144982               | 3.432568  | -0.422810 |
| 9                | 1                | 0              | 0.744193                | 2.115342  | -1.243834 |
| 10               | 35               | 0              | 1.608645                | -0.443144 | -0.324565 |
| 11               | 35               | 0              | -1.556132               | -0.524487 | -0.317447 |
| 12               | 7                | 0              | -0.137606               | 1.651851  | 0.640678  |
| 13               | 1                | 0              | 0.541386                | 2.043378  | 1.293718  |

Supplementary Material (ESI) for Organic & Biomolecular Chemistry  
This journal is (c) The Royal Society of Chemistry 2009

**Oxetane:** See Ref 10.

**2-Fluorooxetane:** E = -291.5512313. TC = 0.085852.

| Center<br>Number | Atomic<br>Number | Atomic<br>Type | Coordinates (Angstroms) |           |           |
|------------------|------------------|----------------|-------------------------|-----------|-----------|
|                  |                  |                | X                       | Y         | Z         |
| 1                | 1                | 0              | 0.981555                | -0.059945 | 1.484204  |
| 2                | 6                | 0              | 0.531501                | 0.003565  | 0.491728  |
| 3                | 6                | 0              | -0.499274               | 1.064702  | 0.132785  |
| 4                | 6                | 0              | -1.322768               | -0.126200 | -0.377657 |
| 5                | 1                | 0              | -0.932128               | 1.562507  | 1.002763  |
| 6                | 1                | 0              | -2.315600               | -0.270123 | 0.052428  |
| 7                | 1                | 0              | -1.353567               | -0.246674 | -1.463529 |
| 8                | 8                | 0              | -0.359817               | -1.054310 | 0.224170  |
| 9                | 1                | 0              | -0.164853               | 1.799893  | -0.600138 |
| 10               | 9                | 0              | 1.600708                | -0.000398 | -0.416692 |

**1-(1-Fluoroethyl)methylether:** E = -331.9322372. TC = 0.139560.

| Center<br>Number | Atomic<br>Number | Atomic<br>Type | Coordinates (Angstroms) |           |           |
|------------------|------------------|----------------|-------------------------|-----------|-----------|
|                  |                  |                | X                       | Y         | Z         |
| 1                | 6                | 0              | 1.366064                | 0.379227  | 0.284390  |
| 2                | 1                | 0              | 1.348172                | 0.480786  | 1.378644  |
| 3                | 1                | 0              | 1.272172                | 1.374961  | -0.159837 |
| 4                | 8                | 0              | 0.248043                | -0.429510 | -0.126184 |
| 5                | 6                | 0              | -0.972660               | 0.026701  | 0.330267  |
| 6                | 1                | 0              | -0.939302               | 0.244467  | 1.406477  |
| 7                | 6                | 0              | -2.045818               | -0.946817 | -0.061416 |
| 8                | 1                | 0              | -3.022680               | -0.567559 | 0.246059  |
| 9                | 1                | 0              | -2.030548               | -1.073836 | -1.145722 |
| 10               | 1                | 0              | -1.863629               | -1.911482 | 0.417646  |
| 11               | 9                | 0              | -1.263492               | 1.281538  | -0.271872 |
| 12               | 6                | 0              | 2.621014                | -0.320082 | -0.183649 |
| 13               | 1                | 0              | 3.503530                | 0.259123  | 0.105097  |
| 14               | 1                | 0              | 2.694355                | -1.315121 | 0.261543  |
| 15               | 1                | 0              | 2.613405                | -0.423279 | -1.271129 |

**3-Fluorooxetane:** E = -291.5352287. TC = 0.085622.

| Center<br>Number | Atomic<br>Number | Atomic<br>Type | Coordinates (Angstroms) |           |           |
|------------------|------------------|----------------|-------------------------|-----------|-----------|
|                  |                  |                | X                       | Y         | Z         |
| 1                | 6                | 0              | -0.478760               | -1.032895 | -0.051312 |
| 2                | 6                | 0              | 0.528865                | -0.000109 | 0.434709  |
| 3                | 6                | 0              | -0.478605               | 1.032902  | -0.051244 |
| 4                | 1                | 0              | 0.716708                | -0.000181 | 1.509985  |
| 5                | 1                | 0              | -0.754158               | 1.858165  | 0.609091  |
| 6                | 1                | 0              | -0.237592               | 1.399007  | -1.056070 |
| 7                | 8                | 0              | -1.509353               | 0.000114  | -0.086719 |
| 8                | 1                | 0              | -0.238009               | -1.399239 | -1.056094 |
| 9                | 1                | 0              | -0.754533               | -1.857917 | 0.609223  |
| 10               | 9                | 0              | 1.768157                | -0.000015 | -0.212811 |

**1-(2-Fluoropropyl)methylether:** E = -331.9119233. TC = 0.139508.

| Center<br>Number | Atomic<br>Number | Atomic<br>Type | Coordinates (Angstroms) |  |  |
|------------------|------------------|----------------|-------------------------|--|--|
|------------------|------------------|----------------|-------------------------|--|--|



Supplementary Material (ESI) for Organic & Biomolecular Chemistry  
 This journal is (c) The Royal Society of Chemistry 2009

| Number | Number | Type | X         | Y         | Z         |
|--------|--------|------|-----------|-----------|-----------|
| 1      | 6      | 0    | -0.997503 | 0.043515  | -0.334970 |
| 2      | 1      | 0    | -0.928522 | 0.191015  | -1.417037 |
| 3      | 6      | 0    | 0.309592  | -0.495243 | 0.187862  |
| 4      | 1      | 0    | 0.329094  | -0.382352 | 1.282914  |
| 5      | 1      | 0    | 0.390986  | -1.567859 | -0.053798 |
| 6      | 6      | 0    | 2.629250  | -0.130664 | 0.141179  |
| 7      | 1      | 0    | 2.834806  | -1.200411 | -0.002280 |
| 8      | 1      | 0    | 3.379860  | 0.457754  | -0.386289 |
| 9      | 1      | 0    | 2.666670  | 0.102054  | 1.213533  |
| 10     | 8      | 0    | 1.369936  | 0.226770  | -0.411533 |
| 11     | 6      | 0    | -2.186078 | -0.808876 | 0.045922  |
| 12     | 1      | 0    | -3.110036 | -0.319763 | -0.270185 |
| 13     | 1      | 0    | -2.126607 | -1.788124 | -0.438641 |
| 14     | 1      | 0    | -2.221935 | -0.951920 | 1.129734  |
| 15     | 9      | 0    | -1.189486 | 1.332561  | 0.221595  |

**2,2-Difluorooxetane:** E = -390.1332569. TC = 0.076872.

| Center Number | Atomic Number | Atomic Type | Coordinates (Angstroms) |           |           |
|---------------|---------------|-------------|-------------------------|-----------|-----------|
|               |               |             | X                       | Y         | Z         |
| 1             | 6             | 0           | -1.714377               | 0.000116  | -0.117647 |
| 2             | 6             | 0           | 0.392327                | -0.000059 | 0.013180  |
| 3             | 6             | 0           | -0.713572               | -0.000421 | 1.077717  |
| 4             | 1             | 0           | -2.309368               | 0.904436  | -0.255072 |
| 5             | 1             | 0           | -2.310231               | -0.903598 | -0.255293 |
| 6             | 1             | 0           | -0.719129               | -0.899131 | 1.699926  |
| 7             | 1             | 0           | -0.719030               | 0.897583  | 1.700940  |
| 8             | 9             | 0           | 1.246422                | 1.123146  | 0.002820  |
| 9             | 9             | 0           | 1.247284                | -1.122536 | 0.002653  |
| 10            | 8             | 0           | -0.521483               | -0.000324 | -1.097407 |

**(2,2-Difluoropropyl)methylether:** E = -430.9567805. TC = 0.131754.

| Center Number | Atomic Number | Atomic Type | Coordinates (Angstroms) |           |           |
|---------------|---------------|-------------|-------------------------|-----------|-----------|
|               |               |             | X                       | Y         | Z         |
| 1             | 6             | 0           | -0.874425               | -0.001911 | 0.000001  |
| 2             | 6             | 0           | 0.493810                | 0.641252  | 0.000081  |
| 3             | 1             | 0           | 0.575208                | 1.278831  | -0.894003 |
| 4             | 1             | 0           | 0.575187                | 1.278586  | 0.894337  |
| 5             | 6             | 0           | 2.786742                | 0.186335  | -0.000003 |
| 6             | 1             | 0           | 2.955504                | 0.799235  | 0.895515  |
| 7             | 1             | 0           | 3.476788                | -0.656856 | -0.000197 |
| 8             | 1             | 0           | 2.955403                | 0.799565  | -0.895314 |
| 9             | 8             | 0           | 1.476266                | -0.365869 | -0.000040 |
| 10            | 6             | 0           | -2.027950               | 0.963935  | -0.000085 |
| 11            | 1             | 0           | -2.957723               | 0.391820  | -0.000158 |
| 12            | 1             | 0           | -1.992847               | 1.592316  | 0.892483  |
| 13            | 1             | 0           | -1.992695               | 1.592305  | -0.892654 |
| 14            | 9             | 0           | -0.981826               | -0.827052 | -1.106321 |
| 15            | 9             | 0           | -0.981954               | -0.827005 | 1.106359  |

**trans-2,3-Difluorooxetane:** E = -390.5786256. TC = 0.078442.

| Center Number | Atomic Number | Atomic Type | Coordinates (Angstroms) |  |  |
|---------------|---------------|-------------|-------------------------|--|--|
|---------------|---------------|-------------|-------------------------|--|--|

Supplementary Material (ESI) for Organic & Biomolecular Chemistry  
 This journal is (c) The Royal Society of Chemistry 2009

| Number | Number | Type | X         | Y         | Z         |
|--------|--------|------|-----------|-----------|-----------|
| 1      | 6      | 0    | -0.651452 | -0.281364 | 0.407548  |
| 2      | 6      | 0    | 0.644671  | -0.255319 | -0.390093 |
| 3      | 6      | 0    | -0.624617 | 1.237485  | 0.267886  |
| 4      | 1      | 0    | -0.556117 | -0.692253 | 1.413775  |
| 5      | 1      | 0    | 0.629586  | -0.665754 | -1.402998 |
| 6      | 1      | 0    | -1.372362 | 1.618631  | -0.431439 |
| 7      | 1      | 0    | -0.601489 | 1.830611  | 1.184319  |
| 8      | 8      | 0    | 0.700896  | 1.161005  | -0.350334 |
| 9      | 9      | 0    | 1.722868  | -0.819133 | 0.272239  |
| 10     | 9      | 0    | -1.713801 | -0.912432 | -0.235910 |

**1,2-Difluoropropylmethylether** (*anti* conformation): E = -430.958648.

TC = 0.132462.

| Center<br>Number | Atomic<br>Number | Atomic<br>Type | Coordinates (Angstroms) |           |           |
|------------------|------------------|----------------|-------------------------|-----------|-----------|
|                  |                  |                | X                       | Y         | Z         |
| 1                | 6                | 0              | 2.558864                | -0.292410 | 0.182206  |
| 2                | 1                | 0              | 2.534035                | -0.552277 | 1.246536  |
| 3                | 1                | 0              | 2.890147                | 0.741072  | 0.055396  |
| 4                | 1                | 0              | 3.229741                | -0.967008 | -0.346803 |
| 5                | 6                | 0              | 0.267502                | 0.223835  | 0.210192  |
| 6                | 6                | 0              | -1.071435               | -0.229812 | -0.333059 |
| 7                | 1                | 0              | -1.006621               | -0.287790 | -1.423489 |
| 8                | 6                | 0              | -2.232858               | 0.609808  | 0.135633  |
| 9                | 1                | 0              | -2.143745               | 1.628669  | -0.247275 |
| 10               | 1                | 0              | -3.165509               | 0.172681  | -0.228068 |
| 11               | 1                | 0              | -2.264625               | 0.642257  | 1.228280  |
| 12               | 8                | 0              | 1.264867                | -0.485599 | -0.406542 |
| 13               | 1                | 0              | 0.316653                | 0.150150  | 1.305410  |
| 14               | 9                | 0              | 0.402287                | 1.604804  | -0.083605 |
| 15               | 9                | 0              | -1.251338               | -1.550526 | 0.138329  |

**1,2-Difluoropropylmethylether** (*gauche* conformation): E = -430.9558637.

TC = 0.132518.

| Center<br>Number | Atomic<br>Number | Atomic<br>Type | Coordinates (Angstroms) |           |           |
|------------------|------------------|----------------|-------------------------|-----------|-----------|
|                  |                  |                | X                       | Y         | Z         |
| 1                | 6                | 0              | 2.594768                | 0.053668  | -0.194148 |
| 2                | 1                | 0              | 2.742523                | -0.619921 | -1.047196 |
| 3                | 1                | 0              | 2.760126                | -0.487094 | 0.739977  |
| 4                | 1                | 0              | 3.280235                | 0.896457  | -0.265160 |
| 5                | 6                | 0              | 0.280516                | -0.324997 | -0.287306 |
| 6                | 6                | 0              | -1.060429               | 0.367301  | -0.407198 |
| 7                | 6                | 0              | -2.221149               | -0.596794 | -0.457071 |
| 8                | 1                | 0              | -2.239808               | -1.206299 | 0.448322  |
| 9                | 1                | 0              | -3.156767               | -0.038431 | -0.531150 |
| 10               | 1                | 0              | -2.138622               | -1.254148 | -1.328582 |
| 11               | 8                | 0              | 1.276905                | 0.618501  | -0.224351 |
| 12               | 1                | 0              | 0.438926                | -1.032855 | -1.116134 |
| 13               | 1                | 0              | -1.025660               | 1.016554  | -1.288729 |
| 14               | 9                | 0              | -1.220694               | 1.208064  | 0.706878  |
| 15               | 9                | 0              | 0.283091                | -1.121102 | 0.877323  |

**cis-2,3-Difluorooxetane**: E = -390.5778789. TC = 0.078673.

Supplementary Material (ESI) for Organic & Biomolecular Chemistry  
 This journal is (c) The Royal Society of Chemistry 2009

| Center<br>Number | Atomic<br>Number | Atomic<br>Type | Coordinates (Angstroms) |           |           |
|------------------|------------------|----------------|-------------------------|-----------|-----------|
|                  |                  |                | X                       | Y         | Z         |
| 1                | 6                | 0              | -0.705144               | 0.329797  | 0.446055  |
| 2                | 6                | 0              | 0.612079                | -0.440629 | 0.520043  |
| 3                | 6                | 0              | 0.069860                | 1.292501  | -0.448374 |
| 4                | 1                | 0              | -1.005002               | 0.758283  | 1.405004  |
| 5                | 1                | 0              | -0.051548               | 1.083426  | -1.513898 |
| 6                | 1                | 0              | 0.021421                | 2.361799  | -0.238123 |
| 7                | 8                | 0              | 1.310422                | 0.700661  | 0.075085  |
| 8                | 9                | 0              | -1.791459               | -0.323982 | -0.107606 |
| 9                | 9                | 0              | 0.645188                | -1.459141 | -0.426858 |
| 10               | 1                | 0              | 1.007416                | -0.850708 | 1.450168  |

**2-Chlorooxetane:** E = -651.5542897. TC = 0.084732.

| Center<br>Number | Atomic<br>Number | Atomic<br>Type | Coordinates (Angstroms) |           |           |
|------------------|------------------|----------------|-------------------------|-----------|-----------|
|                  |                  |                | X                       | Y         | Z         |
| 1                | 1                | 0              | 0.280254                | -0.016087 | 1.723053  |
| 2                | 6                | 0              | 0.035896                | 0.018445  | 0.661364  |
| 3                | 6                | 0              | -0.939376               | 1.062698  | 0.120055  |
| 4                | 6                | 0              | -1.602382               | -0.139087 | -0.562618 |
| 5                | 1                | 0              | -1.553878               | 1.494899  | 0.913354  |
| 6                | 1                | 0              | -2.670145               | -0.296982 | -0.401102 |
| 7                | 1                | 0              | -1.349958               | -0.264211 | -1.619499 |
| 8                | 8                | 0              | -0.810664               | -1.050896 | 0.267827  |
| 9                | 1                | 0              | -0.524309               | 1.849382  | -0.510306 |
| 10               | 17               | 0              | 1.608148                | -0.000716 | -0.209466 |

**Chloromethylmethyl ether:** E = -652.7572662. TC = 0.108162.

| Center<br>Number | Atomic<br>Number | Atomic<br>Type | Coordinates (Angstroms) |           |           |
|------------------|------------------|----------------|-------------------------|-----------|-----------|
|                  |                  |                | X                       | Y         | Z         |
| 1                | 6                | 0              | -2.072639               | -0.307326 | 0.072507  |
| 2                | 1                | 0              | -2.237771               | -0.212388 | 1.152612  |
| 3                | 1                | 0              | -2.967389               | -0.000999 | -0.467310 |
| 4                | 1                | 0              | -1.822355               | -1.342995 | -0.173305 |
| 5                | 8                | 0              | -1.034358               | 0.578957  | -0.354471 |
| 6                | 6                | 0              | 0.158200                | 0.440135  | 0.341376  |
| 7                | 1                | 0              | -0.023900               | 0.383741  | 1.421398  |
| 8                | 6                | 0              | 1.062658                | 1.583746  | -0.036221 |
| 9                | 1                | 0              | 2.020281                | 1.503784  | 0.482233  |
| 10               | 1                | 0              | 1.236814                | 1.573482  | -1.114018 |
| 11               | 1                | 0              | 0.577993                | 2.523996  | 0.239878  |
| 12               | 17               | 0              | 0.976581                | -1.138800 | -0.057158 |

**2,2-Dichlorooxetane:** E = -1110.5986336. TC = 0.075569.

| Center<br>Number | Atomic<br>Number | Atomic<br>Type | Coordinates (Angstroms) |   |   |
|------------------|------------------|----------------|-------------------------|---|---|
|                  |                  |                | X                       | Y | Z |

Supplementary Material (ESI) for Organic & Biomolecular Chemistry  
 This journal is (c) The Royal Society of Chemistry 2009

|    |    |   |           |           |           |
|----|----|---|-----------|-----------|-----------|
| 1  | 1  | 0 | 2.580032  | -1.369262 | -0.319056 |
| 2  | 6  | 0 | 1.994189  | -0.466033 | -0.144256 |
| 3  | 1  | 0 | 2.607357  | 0.430402  | -0.265862 |
| 4  | 6  | 0 | 1.051208  | -0.445358 | 1.062726  |
| 5  | 6  | 0 | -0.004018 | -0.075315 | 0.020561  |
| 6  | 1  | 0 | 0.871844  | -1.436841 | 1.481215  |
| 7  | 1  | 0 | 1.232122  | 0.282803  | 1.853137  |
| 8  | 17 | 0 | -0.392108 | 1.671835  | 0.005018  |
| 9  | 17 | 0 | -1.505428 | -1.002812 | -0.002786 |
| 10 | 8  | 0 | 0.839810  | -0.420032 | -1.052695 |

**1-(1,1-Dichloroethyl)ethyl ether:** E = -1150.9795942. TC = 0.129352.

| Center<br>Number | Atomic<br>Number | Atomic<br>Type | Coordinates (Angstroms) |           |           |
|------------------|------------------|----------------|-------------------------|-----------|-----------|
|                  |                  |                | X                       | Y         | Z         |
| 1                | 6                | 0              | -1.291147               | 0.116665  | 1.662837  |
| 2                | 6                | 0              | -0.528652               | 0.019994  | 0.364111  |
| 3                | 1                | 0              | -2.362292               | 0.193504  | 1.471771  |
| 4                | 1                | 0              | -0.950081               | 1.002399  | 2.202739  |
| 5                | 1                | 0              | -1.086620               | -0.776754 | 2.256355  |
| 6                | 8                | 0              | 0.804150                | -0.059065 | 0.661438  |
| 7                | 17               | 0              | -0.893246               | 1.479715  | -0.648293 |
| 8                | 17               | 0              | -1.094604               | -1.428102 | -0.559953 |
| 9                | 6                | 0              | 1.744219                | -0.239170 | -0.423501 |
| 10               | 6                | 0              | 3.113831                | 0.044414  | 0.145134  |
| 11               | 1                | 0              | 1.491398                | 0.450852  | -1.233641 |
| 12               | 1                | 0              | 1.659285                | -1.266691 | -0.788427 |
| 13               | 1                | 0              | 3.872934                | -0.112479 | -0.627511 |
| 14               | 1                | 0              | 3.178423                | 1.077551  | 0.493890  |
| 15               | 1                | 0              | 3.327695                | -0.624700 | 0.982011  |

**3-Chlorooxetane:** E = -651.5467881. TC = 0.084693.

| Center<br>Number | Atomic<br>Number | Atomic<br>Type | Coordinates (Angstroms) |           |           |
|------------------|------------------|----------------|-------------------------|-----------|-----------|
|                  |                  |                | X                       | Y         | Z         |
| 1                | 6                | 0              | 0.070290                | 0.000000  | 0.494089  |
| 2                | 6                | 0              | -0.907472               | -1.029135 | -0.068498 |
| 3                | 6                | 0              | -0.907472               | 1.029135  | -0.068498 |
| 4                | 1                | 0              | 0.101710                | 0.000000  | 1.583992  |
| 5                | 1                | 0              | -1.202159               | -1.870811 | 0.562519  |
| 6                | 1                | 0              | -0.634035               | -1.370963 | -1.073813 |
| 7                | 1                | 0              | -1.202161               | 1.870812  | 0.562518  |
| 8                | 1                | 0              | -0.634036               | 1.370964  | -1.073813 |
| 9                | 8                | 0              | -1.938861               | -0.000001 | -0.121545 |
| 10               | 17               | 0              | 1.738206                | 0.000000  | -0.101859 |

**1-(2-Chloropropyl)methyl Ether:** E = 691.9223035. E = 0.138569.

| Center<br>Number | Atomic<br>Number | Atomic<br>Type | Coordinates (Angstroms) |           |          |
|------------------|------------------|----------------|-------------------------|-----------|----------|
|                  |                  |                | X                       | Y         | Z        |
| 1                | 6                | 0              | 2.839393                | -0.082649 | 0.156550 |
| 2                | 1                | 0              | 2.816051                | -0.374370 | 1.214720 |

Supplementary Material (ESI) for Organic & Biomolecular Chemistry  
 This journal is (c) The Royal Society of Chemistry 2009

|    |    |   |           |           |           |
|----|----|---|-----------|-----------|-----------|
| 3  | 1  | 0 | 3.232146  | 0.939935  | 0.073035  |
| 4  | 1  | 0 | 3.483576  | -0.766163 | -0.396280 |
| 5  | 6  | 0 | 0.616643  | 0.674054  | 0.206062  |
| 6  | 1  | 0 | 0.885762  | 1.727599  | 0.021254  |
| 7  | 1  | 0 | 0.606013  | 0.504638  | 1.294143  |
| 8  | 6  | 0 | -0.756425 | 0.416166  | -0.372953 |
| 9  | 1  | 0 | -0.676496 | 0.406186  | -1.463148 |
| 10 | 6  | 0 | -1.769068 | 1.448750  | 0.088239  |
| 11 | 1  | 0 | -1.467206 | 2.443935  | -0.254847 |
| 12 | 1  | 0 | -2.758266 | 1.227636  | -0.318244 |
| 13 | 1  | 0 | -1.843370 | 1.460155  | 1.179694  |
| 14 | 8  | 0 | 1.546763  | -0.184326 | -0.425141 |
| 15 | 17 | 0 | -1.307975 | -1.225463 | 0.093142  |

**cis-2,3-Dichlorooxetane:** E = -1110.5948458. TC = 0.076378.

| Center<br>Number | Atomic<br>Number | Atomic<br>Type | Coordinates (Angstroms) |           |           |
|------------------|------------------|----------------|-------------------------|-----------|-----------|
|                  |                  |                | X                       | Y         | Z         |
| 1                | 6                | 0              | 0.684406                | 0.603529  | 0.431669  |
| 2                | 6                | 0              | -0.787095               | 0.227757  | 0.674565  |
| 3                | 6                | 0              | 0.116799                | 1.557145  | -0.614817 |
| 4                | 1                | 0              | 1.068287                | 1.141504  | 1.300254  |
| 5                | 1                | 0              | -1.156968               | 0.148929  | 1.696876  |
| 6                | 1                | 0              | 0.469184                | 2.589884  | -0.622653 |
| 7                | 1                | 0              | 0.087400                | 1.135705  | -1.623953 |
| 8                | 8                | 0              | -1.187923               | 1.439142  | 0.042339  |
| 9                | 17               | 0              | 1.876420                | -0.598686 | -0.040038 |
| 10               | 17               | 0              | -1.349901               | -1.216593 | -0.197476 |

**1,2-Dichloropropylmethylether (gauche conformation):** E = -  
 1150.9712794. TC = 0.130198.

| Center<br>Number | Atomic<br>Number | Atomic<br>Type | Coordinates (Angstroms) |           |           |
|------------------|------------------|----------------|-------------------------|-----------|-----------|
|                  |                  |                | X                       | Y         | Z         |
| 1                | 6                | 0              | 2.647437                | -0.851449 | 0.329311  |
| 2                | 1                | 0              | 2.925021                | -0.464425 | 1.317412  |
| 3                | 1                | 0              | 3.019099                | -0.180743 | -0.449772 |
| 4                | 1                | 0              | 3.059900                | -1.849564 | 0.191355  |
| 5                | 6                | 0              | 0.512768                | 0.145065  | 0.521674  |
| 6                | 6                | 0              | -0.949788               | -0.227933 | 0.704395  |
| 7                | 6                | 0              | -1.819400               | 0.939254  | 1.131709  |
| 8                | 1                | 0              | -1.885068               | 1.689689  | 0.341901  |
| 9                | 1                | 0              | -2.827116               | 0.585873  | 1.361011  |
| 10               | 1                | 0              | -1.402799               | 1.406923  | 2.030631  |
| 11               | 8                | 0              | 1.227323                | -1.002382 | 0.231395  |
| 12               | 17               | 0              | 0.729704                | 1.416275  | -0.747012 |
| 13               | 1                | 0              | 0.873382                | 0.613534  | 1.448702  |
| 14               | 17               | 0              | -1.610676               | -0.993129 | -0.764141 |
| 15               | 1                | 0              | -0.950571               | -1.005341 | 1.474676  |

Supplementary Material (ESI) for Organic & Biomolecular Chemistry  
 This journal is (c) The Royal Society of Chemistry 2009

**trans-2,3-Dichlorooxetane:** E = -1110.5960168. TC = 0.076265.

| Center<br>Number | Atomic<br>Number | Atomic<br>Type | Coordinates (Angstroms) |           |           |
|------------------|------------------|----------------|-------------------------|-----------|-----------|
|                  |                  |                | X                       | Y         | Z         |
| 1                | 6                | 0              | -0.631924               | 0.120636  | 0.444304  |
| 2                | 6                | 0              | 0.610798                | 0.120719  | -0.439389 |
| 3                | 6                | 0              | -0.620285               | 1.630740  | 0.208094  |
| 4                | 1                | 0              | -0.399534               | -0.152184 | 1.474035  |
| 5                | 1                | 0              | 0.428851                | -0.140259 | -1.486118 |
| 6                | 1                | 0              | -1.285665               | 1.950698  | -0.599761 |
| 7                | 1                | 0              | -0.708572               | 2.287118  | 1.075842  |
| 8                | 17               | 0              | -2.027048               | -0.815957 | -0.091322 |
| 9                | 17               | 0              | 2.008948                | -0.799532 | 0.108060  |
| 10               | 8                | 0              | 0.765137                | 1.535670  | -0.253323 |

**(R,S)-1,2-Dichloropropylmethylether (anti conformation):**

E = -1150.9733875. TC = 0.130316.

| Center<br>Number | Atomic<br>Number | Atomic<br>Type | Coordinates (Angstroms) |           |           |
|------------------|------------------|----------------|-------------------------|-----------|-----------|
|                  |                  |                | X                       | Y         | Z         |
| 1                | 6                | 0              | 1.866952                | -1.881394 | 0.221937  |
| 2                | 1                | 0              | 1.546702                | -2.150382 | 1.234952  |
| 3                | 1                | 0              | 2.787861                | -1.292092 | 0.262743  |
| 4                | 1                | 0              | 2.027122                | -2.782382 | -0.367875 |
| 5                | 6                | 0              | 0.429491                | -0.011056 | 0.207277  |
| 6                | 6                | 0              | -0.915370               | 0.419958  | -0.355233 |
| 7                | 1                | 0              | -0.832409               | 0.445238  | -1.445071 |
| 8                | 6                | 0              | -1.436842               | 1.734373  | 0.194888  |
| 9                | 1                | 0              | -0.802723               | 2.562383  | -0.126215 |
| 10               | 1                | 0              | -2.451378               | 1.907041  | -0.170295 |
| 11               | 1                | 0              | -1.465677               | 1.712692  | 1.288455  |
| 12               | 8                | 0              | 0.830424                | -1.156501 | -0.447959 |
| 13               | 17               | 0              | -2.082414               | -0.885881 | 0.039987  |
| 14               | 17               | 0              | 1.641561                | 1.323098  | -0.040009 |
| 15               | 1                | 0              | 0.376229                | -0.154476 | 1.294136  |

**2-Bromooxetane:** E = -2761.9781931. TC = 0.084235.

| Center<br>Number | Atomic<br>Number | Atomic<br>Type | Coordinates (Angstroms) |           |           |
|------------------|------------------|----------------|-------------------------|-----------|-----------|
|                  |                  |                | X                       | Y         | Z         |
| 1                | 1                | 0              | -0.367717               | -0.030547 | 1.809403  |
| 2                | 6                | 0              | -0.553273               | 0.010652  | 0.736609  |
| 3                | 6                | 0              | -1.464609               | 1.063180  | 0.117589  |
| 4                | 6                | 0              | -2.048287               | -0.133499 | -0.646550 |
| 5                | 1                | 0              | -2.161787               | 1.472366  | 0.853664  |
| 6                | 1                | 0              | -3.127303               | -0.293058 | -0.615243 |
| 7                | 1                | 0              | -1.665832               | -0.254788 | -1.664042 |
| 8                | 8                | 0              | -1.360108               | -1.050258 | 0.270631  |
| 9                | 1                | 0              | -0.997947               | 1.864806  | -0.454206 |
| 10               | 35               | 0              | 1.245670                | 0.000037  | -0.095443 |

**Bromomethylethyl ether:** E = -2802.3601564. TC = 0.137950.

| Center<br>Number | Atomic<br>Number | Atomic<br>Type | Coordinates (Angstroms) |   |   |
|------------------|------------------|----------------|-------------------------|---|---|
|                  |                  |                | X                       | Y | Z |

Supplementary Material (ESI) for Organic & Biomolecular Chemistry  
 This journal is (c) The Royal Society of Chemistry 2009

```

-----
  1          6          0          1.868331  -0.545643   0.291540
  2          1          0          1.375134  -1.449433  -0.082372
  3          1          0          1.818347  -0.552306   1.389311
  4          8          0          1.154946   0.601013  -0.200147
  5          6          0         -0.065129   0.835323   0.401455
  6          6          0         -0.603338   2.144602  -0.110368
  7          1          0         -1.578802   2.360494   0.330426
  8          1          0          0.099610   2.940207   0.155459
  9          1          0         -0.700397   2.101248  -1.196780
 10         6          0          3.293175  -0.438543  -0.197561
 11         1          0          3.866469  -1.311022   0.131034
 12         1          0          3.316736  -0.399151  -1.289158
 13         1          0          3.770187   0.461971   0.196297
 14         1          0         -0.001607   0.774743   1.494033
 15        35          0         -1.376100  -0.620266  -0.052499
  
```

**2,2-Dibromooxetane:** E = -5331.4490599. TC = 0.074698.

| Center<br>Number | Atomic<br>Number | Atomic<br>Type | Coordinates (Angstroms) |           |           |
|------------------|------------------|----------------|-------------------------|-----------|-----------|
|                  |                  |                | X                       | Y         | Z         |
| 1                | 6                | 0              | 0.007839                | 0.463112  | 0.012411  |
| 2                | 6                | 0              | 0.265466                | 1.533260  | 1.065536  |
| 3                | 6                | 0              | 0.774059                | 2.338350  | -0.137838 |
| 4                | 1                | 0              | -0.666225               | 1.931021  | 1.472186  |
| 5                | 1                | 0              | 0.352860                | 3.330281  | -0.306192 |
| 6                | 1                | 0              | 1.859665                | 2.339440  | -0.263425 |
| 7                | 8                | 0              | 0.161130                | 1.359806  | -1.054115 |
| 8                | 1                | 0              | 0.966696                | 1.283678  | 1.861199  |
| 9                | 35               | 0              | 1.426253                | -0.900883 | 0.001179  |
| 10               | 35               | 0              | -1.714431               | -0.406866 | -0.000365 |

**1,1-Dibromoethylmethyl ether:** E = -5332.6572202. TC = 0.098365.

| Center<br>Number | Atomic<br>Number | Atomic<br>Type | Coordinates (Angstroms) |           |           |
|------------------|------------------|----------------|-------------------------|-----------|-----------|
|                  |                  |                | X                       | Y         | Z         |
| 1                | 6                | 0              | 0.000021                | -0.196147 | 2.063978  |
| 2                | 6                | 0              | 0.000001                | 0.275164  | 0.632977  |
| 3                | 1                | 0              | 0.000039                | -1.285965 | 2.102996  |
| 4                | 1                | 0              | -0.894165               | 0.192081  | 2.558325  |
| 5                | 1                | 0              | 0.894204                | 0.192107  | 2.558309  |
| 6                | 8                | 0              | -0.000031               | 1.633283  | 0.617314  |
| 7                | 6                | 0              | -0.000102               | 2.303548  | -0.655593 |
| 8                | 1                | 0              | -0.898432               | 2.038713  | -1.216637 |
| 9                | 1                | 0              | 0.897928                | 2.038371  | -1.216957 |
| 10               | 1                | 0              | 0.000149                | 3.363942  | -0.410497 |
| 11               | 35               | 0              | 1.581863                | -0.484270 | -0.308037 |
| 12               | 35               | 0              | -1.581835               | -0.484327 | -0.308026 |

**Thietane:** See Ref. 10.

**2-Fluorothietane:** E = -614.1629452. TC = 0.083390.

| Center<br>Number | Atomic<br>Number | Atomic<br>Type | Coordinates (Angstroms) |           |          |
|------------------|------------------|----------------|-------------------------|-----------|----------|
|                  |                  |                | X                       | Y         | Z        |
| 1                | 1                | 0              | 1.201028                | -0.336200 | 1.445620 |

Supplementary Material (ESI) for Organic & Biomolecular Chemistry  
 This journal is (c) The Royal Society of Chemistry 2009

|    |    |   |           |           |           |
|----|----|---|-----------|-----------|-----------|
| 2  | 6  | 0 | 0.748129  | -0.074422 | 0.488297  |
| 3  | 6  | 0 | 0.097698  | 1.296219  | 0.321255  |
| 4  | 6  | 0 | -1.137078 | 0.787573  | -0.444028 |
| 5  | 1  | 0 | -0.178181 | 1.712916  | 1.294162  |
| 6  | 1  | 0 | -2.099873 | 1.165195  | -0.095870 |
| 7  | 1  | 0 | -1.061698 | 0.907515  | -1.526166 |
| 8  | 1  | 0 | 0.733389  | 2.010780  | -0.209672 |
| 9  | 9  | 0 | 1.749088  | -0.271220 | -0.482981 |
| 10 | 16 | 0 | -0.786809 | -0.942215 | 0.077850  |

**1-(1-Fluoroethylmethyl) sulfide:** E = -714.4040618. TC = 0.098174.

| Center Number | Atomic Number | Atomic Type | Coordinates (Angstroms) |           |           |
|---------------|---------------|-------------|-------------------------|-----------|-----------|
|               |               |             | X                       | Y         | Z         |
| 1             | 6             | 0           | -2.072288               | -0.444174 | -0.000007 |
| 2             | 1             | 0           | -3.058722               | 0.023990  | 0.000073  |
| 3             | 1             | 0           | -1.968858               | -1.057342 | 0.895375  |
| 4             | 1             | 0           | -1.968954               | -1.057245 | -0.895466 |
| 5             | 6             | 0           | 0.633022                | -0.074458 | 0.000000  |
| 6             | 6             | 0           | 1.881208                | 0.760604  | -0.000024 |
| 7             | 1             | 0           | 1.910847                | 1.387119  | 0.892949  |
| 8             | 1             | 0           | 2.739276                | 0.085094  | -0.000024 |
| 9             | 1             | 0           | 1.910828                | 1.387097  | -0.893013 |
| 10            | 16            | 0           | -0.869018               | 0.905884  | 0.000004  |
| 11            | 9             | 0           | 0.649356                | -0.928578 | 1.095114  |
| 12            | 9             | 0           | 0.649335                | -0.928609 | -1.095088 |

**2,2-Difluorothietane :** E = -713.2081387. TC = 0.075616.

| Center Number | Atomic Number | Atomic Type | Coordinates (Angstroms) |           |           |
|---------------|---------------|-------------|-------------------------|-----------|-----------|
|               |               |             | X                       | Y         | Z         |
| 1             | 6             | 0           | 1.580767                | 0.670092  | 0.029254  |
| 2             | 6             | 0           | -0.590225               | 0.058915  | -0.010320 |
| 3             | 6             | 0           | 0.209624                | 1.337769  | -0.197929 |
| 4             | 1             | 0           | 2.028932                | 0.906645  | 0.994784  |
| 5             | 1             | 0           | 2.305755                | 0.832918  | -0.768701 |
| 6             | 1             | 0           | 0.086583                | 1.714238  | -1.215826 |
| 7             | 1             | 0           | -0.061041               | 2.115692  | 0.520197  |
| 8             | 9             | 0           | -1.308965               | 0.034049  | 1.162303  |
| 9             | 9             | 0           | -1.502221               | -0.211155 | -0.996597 |
| 10            | 16            | 0           | 0.858715                | -1.023512 | 0.003260  |

**1-(1,1-Difluoroethyl)methyl Sulfide:** E = -714.4040618. TC = 0.098174.

| Center Number | Atomic Number | Atomic Type | Coordinates (Angstroms) |           |           |
|---------------|---------------|-------------|-------------------------|-----------|-----------|
|               |               |             | X                       | Y         | Z         |
| 1             | 6             | 0           | -2.072288               | -0.444174 | -0.000007 |
| 2             | 1             | 0           | -3.058722               | 0.023990  | 0.000073  |
| 3             | 1             | 0           | -1.968858               | -1.057342 | 0.895375  |
| 4             | 1             | 0           | -1.968954               | -1.057245 | -0.895466 |
| 5             | 6             | 0           | 0.633022                | -0.074458 | 0.000000  |
| 6             | 6             | 0           | 1.881208                | 0.760604  | -0.000024 |
| 7             | 1             | 0           | 1.910847                | 1.387119  | 0.892949  |
| 8             | 1             | 0           | 2.739276                | 0.085094  | -0.000024 |
| 9             | 1             | 0           | 1.910828                | 1.387097  | -0.893013 |
| 10            | 16            | 0           | -0.869018               | 0.905884  | 0.000004  |



Supplementary Material (ESI) for Organic & Biomolecular Chemistry  
 This journal is (c) The Royal Society of Chemistry 2009

|    |   |   |          |           |           |
|----|---|---|----------|-----------|-----------|
| 11 | 9 | 0 | 0.649356 | -0.928578 | 1.095114  |
| 12 | 9 | 0 | 0.649335 | -0.928609 | -1.095088 |

**2-Chlorothietane:** E = -974.1705009. TC = 0.082420.

| Center<br>Number | Atomic<br>Number | Atomic<br>Type | Coordinates (Angstroms) |           |           |
|------------------|------------------|----------------|-------------------------|-----------|-----------|
|                  |                  |                | X                       | Y         | Z         |
| 1                | 1                | 0              | 0.555984                | -0.143730 | 1.726866  |
| 2                | 6                | 0              | 0.292116                | 0.036779  | 0.685402  |
| 3                | 6                | 0              | -0.485382               | 1.321223  | 0.368532  |
| 4                | 6                | 0              | -1.440125               | 0.665011  | -0.639084 |
| 5                | 1                | 0              | -1.028711               | 1.644917  | 1.261510  |
| 6                | 1                | 0              | -2.489655               | 0.956431  | -0.570869 |
| 7                | 1                | 0              | -1.097667               | 0.745606  | -1.672909 |
| 8                | 1                | 0              | 0.121494                | 2.151408  | -0.003788 |
| 9                | 16               | 0              | -1.071979               | -0.995685 | 0.058423  |
| 10               | 17               | 0              | 1.817092                | -0.091868 | -0.244982 |

**(1-Chloromethyl)methylsulfide:** E = -975.3659112. TC = 0.105066.

| Center<br>Number | Atomic<br>Number | Atomic<br>Type | Coordinates (Angstroms) |           |           |
|------------------|------------------|----------------|-------------------------|-----------|-----------|
|                  |                  |                | X                       | Y         | Z         |
| 1                | 6                | 0              | 2.067301                | -0.706049 | 0.310846  |
| 2                | 1                | 0              | 2.069195                | -0.698448 | 1.403851  |
| 3                | 1                | 0              | 1.672687                | -1.655820 | -0.053780 |
| 4                | 1                | 0              | 3.095153                | -0.590058 | -0.039692 |
| 5                | 6                | 0              | -0.470790               | 0.350179  | 0.416114  |
| 6                | 1                | 0              | -0.332250               | 0.221575  | 1.492586  |
| 7                | 6                | 0              | -1.424161               | 1.496270  | 0.133308  |
| 8                | 1                | 0              | -1.577114               | 1.615150  | -0.942332 |
| 9                | 1                | 0              | -2.392016               | 1.301013  | 0.600664  |
| 10               | 1                | 0              | -1.015432               | 2.425906  | 0.539414  |
| 11               | 16               | 0              | 1.121376                | 0.681182  | -0.351303 |
| 12               | 17               | 0              | -1.205667               | -1.197684 | -0.149498 |

**2,2-Dichlorothietane:** E = -1433.2110926. TC = 0.073389.

| Center<br>Number | Atomic<br>Number | Atomic<br>Type | Coordinates (Angstroms) |           |           |
|------------------|------------------|----------------|-------------------------|-----------|-----------|
|                  |                  |                | X                       | Y         | Z         |
| 1                | 6                | 0              | 1.996561                | 0.050017  | 0.579344  |
| 2                | 6                | 0              | -0.201241               | -0.035726 | 0.103313  |
| 3                | 6                | 0              | 0.681442                | -0.112699 | 1.354125  |
| 4                | 1                | 0              | 2.822070                | -0.584467 | 0.905543  |
| 5                | 1                | 0              | 2.324084                | 1.088575  | 0.501695  |
| 6                | 1                | 0              | 0.458371                | 0.633046  | 2.122130  |
| 7                | 1                | 0              | 0.610073                | -1.116156 | 1.780752  |
| 8                | 17               | 0              | -1.600975               | -1.117004 | 0.073689  |
| 9                | 16               | 0              | 1.193044                | -0.517241 | -0.973085 |
| 10               | 17               | 0              | -0.761606               | 1.637317  | -0.189068 |

**(1,1-Dichloroethyl)methylsulfide:** E = -1434.4053269. TC = 0.096018.

| Center<br>Number | Atomic<br>Number | Atomic<br>Type | Coordinates (Angstroms) |          |          |
|------------------|------------------|----------------|-------------------------|----------|----------|
|                  |                  |                | X                       | Y        | Z        |
| 1                | 6                | 0              | 1.293719                | 0.000095 | 1.540298 |
| 2                | 1                | 0              | 2.342296                | 0.000249 | 1.235865 |

Supplementary Material (ESI) for Organic & Biomolecular Chemistry  
 This journal is (c) The Royal Society of Chemistry 2009

|    |    |   |           |           |           |
|----|----|---|-----------|-----------|-----------|
| 3  | 1  | 0 | 1.096565  | 0.892810  | 2.138874  |
| 4  | 1  | 0 | 1.096804  | -0.892736 | 2.138779  |
| 5  | 6  | 0 | 0.401821  | 0.000044  | 0.311109  |
| 6  | 6  | 0 | -2.192179 | -0.000090 | -0.712327 |
| 7  | 1  | 0 | -1.960106 | -0.895680 | -1.290700 |
| 8  | 1  | 0 | -3.256910 | -0.000523 | -0.467426 |
| 9  | 1  | 0 | -1.960704 | 0.895989  | -1.290182 |
| 10 | 16 | 0 | -1.314593 | -0.000246 | 0.862275  |
| 11 | 17 | 0 | 0.784204  | -1.449912 | -0.679370 |
| 12 | 17 | 0 | 0.783758  | 1.450120  | -0.679224 |

2-Bromothietane: E = -3084.5977579. TC = 0.081953.

| Center<br>Number | Atomic<br>Number | Atomic<br>Type | Coordinates (Angstroms) |           |           |
|------------------|------------------|----------------|-------------------------|-----------|-----------|
|                  |                  |                | X                       | Y         | Z         |
| 1                | 1                | 0              | -0.090031               | -0.109450 | 1.833843  |
| 2                | 6                | 0              | -0.295227               | 0.060571  | 0.777991  |
| 3                | 6                | 0              | -1.060102               | 1.325722  | 0.378984  |
| 4                | 6                | 0              | -1.882656               | 0.637797  | -0.721017 |
| 5                | 1                | 0              | -1.706868               | 1.628685  | 1.209007  |
| 6                | 1                | 0              | -2.938200               | 0.908456  | -0.782573 |
| 7                | 1                | 0              | -1.418446               | 0.707248  | -1.707321 |
| 8                | 1                | 0              | -0.444943               | 2.175329  | 0.070930  |
| 9                | 16               | 0              | -1.563464               | -1.005394 | 0.043274  |
| 10               | 35               | 0              | 1.458338                | -0.039100 | -0.112343 |

(1-Bromomethyl)methylsulfide: E = -3085.7927512. TC = 0.104581.

| Center<br>Number | Atomic<br>Number | Atomic<br>Type | Coordinates (Angstroms) |           |           |
|------------------|------------------|----------------|-------------------------|-----------|-----------|
|                  |                  |                | X                       | Y         | Z         |
| 1                | 6                | 0              | 1.973441                | -1.371386 | 0.306240  |
| 2                | 1                | 0              | 1.917821                | -1.364079 | 1.397765  |
| 3                | 1                | 0              | 1.235711                | -2.067637 | -0.095714 |
| 4                | 1                | 0              | 2.973599                | -1.694462 | 0.009018  |
| 5                | 6                | 0              | 0.199319                | 0.723417  | 0.458085  |
| 6                | 1                | 0              | 0.288285                | 0.574145  | 1.536375  |
| 7                | 6                | 0              | -0.176561               | 2.150320  | 0.108899  |
| 8                | 1                | 0              | -0.311889               | 2.253986  | -0.970384 |
| 9                | 1                | 0              | -1.107825               | 2.431074  | 0.605767  |
| 10               | 1                | 0              | 0.617783                | 2.829407  | 0.435438  |
| 11               | 16               | 0              | 1.729221                | 0.286547  | -0.362714 |
| 12               | 35               | 0              | -1.293092               | -0.473180 | -0.067262 |

2,2-Dibromothietane: E = -5654.0680955. TC = 0.072571.

| Center<br>Number | Atomic<br>Number | Atomic<br>Type | Coordinates (Angstroms) |          |           |
|------------------|------------------|----------------|-------------------------|----------|-----------|
|                  |                  |                | X                       | Y        | Z         |
| 1                | 6                | 0              | -1.624686               | 1.816538 | 0.575520  |
| 2                | 6                | 0              | -0.050367               | 0.301707 | 0.117553  |
| 3                | 6                | 0              | -0.546857               | 1.046953 | 1.355829  |
| 4                | 1                | 0              | -1.763385               | 2.863050 | 0.852421  |
| 5                | 1                | 0              | -2.583854               | 1.295041 | 0.547610  |
| 6                | 1                | 0              | -0.879425               | 0.413207 | 2.182123  |
| 7                | 1                | 0              | 0.233243                | 1.731729 | 1.699632  |
| 8                | 16               | 0              | -0.696409               | 1.576318 | -0.996839 |

Supplementary Material (ESI) for Organic & Biomolecular Chemistry  
This journal is (c) The Royal Society of Chemistry 2009

|    |    |   |           |           |           |
|----|----|---|-----------|-----------|-----------|
| 9  | 35 | 0 | 1.848965  | -0.037197 | 0.017913  |
| 10 | 35 | 0 | -1.007039 | -1.406098 | -0.064364 |

**(1,1-Dibromoethyl)methylsulfide:** E = -5655.2647866. TC = 0.095268.

| Center<br>Number | Atomic<br>Number | Atomic<br>Type | Coordinates (Angstroms) |           |           |
|------------------|------------------|----------------|-------------------------|-----------|-----------|
|                  |                  |                | X                       | Y         | Z         |
| 1                | 6                | 0              | -0.104009               | -0.423752 | 2.046370  |
| 2                | 1                | 0              | -0.238645               | -1.506965 | 2.052868  |
| 3                | 1                | 0              | 0.817771                | -0.171686 | 2.578104  |
| 4                | 1                | 0              | -0.957373               | 0.045719  | 2.544889  |
| 5                | 6                | 0              | -0.016356               | 0.079741  | 0.618400  |
| 6                | 6                | 0              | 0.431920                | 2.196296  | -1.123668 |
| 7                | 1                | 0              | -0.305103               | 1.655666  | -1.721088 |
| 8                | 1                | 0              | 0.278849                | 3.269847  | -1.257277 |
| 9                | 1                | 0              | 1.441317                | 1.930655  | -1.438819 |
| 10               | 16               | 0              | 0.179993                | 1.856147  | 0.629956  |
| 11               | 35               | 0              | 1.479545                | -0.826491 | -0.285067 |
| 12               | 35               | 0              | -1.644860               | -0.488803 | -0.345921 |
